# Supplementary material
Source: publisher figshare collection journal article supplement (https://wiley.figshare.com/articles/dataset/_/3564798)
Supplement: Supplementary file 1 [file 1]

ESA Supplementary Publication Service

Document No. 8628

Tables of pollen-percentage values from cores of  
barrier-beach sediments

Supplement to

"Dynamism in the barrier-beach vegetation of  
Great South Beach, New York"

by

James S. Clark

ECOLOGICAL MONOGRAPHS Vol. 56  
1986

# HALLT'S INLET CORE 1

| NO. | TYPE                         | DEPTH OF SAMPLE (MM) |        |        |        |        |        |
|-----|------------------------------|----------------------|--------|--------|--------|--------|--------|
|     |                              | 24                   | 33     | 125    | 132    | 163    | 204    |
| 1   | PINUS HAPLOXYLON             | 0.00                 | 0.70   | 28.68  | 15.77  | 16.57  | 0.00   |
| 2   | PINUS DIPLOXYLON             | 35.58                | 6.70   | 0.00   | 15.77  | 0.00   | 30.97  |
| 3   | TOTAL PINUS                  | 35.58                | 13.40  | 28.68  | 31.53  | 16.57  | 30.97  |
| 4   | PICEA                        | 0.00                 | 0.00   | 1.00   | 2.27   | 0.84   | 0.26   |
| 5   | ABIES                        | 0.00                 | 0.00   | 0.00   | 0.00   | 0.00   | 0.00   |
| 6   | TSUGA                        | 1.00                 | 1.00   | 3.99   | 5.97   | 5.06   | 5.25   |
| 7   | FAGUS                        | 0.00                 | 0.00   | 0.00   | 0.00   | 0.00   | 0.00   |
| 8   | QUERCUS                      | 0.00                 | 0.00   | 0.00   | 0.00   | 0.00   | 0.00   |
| 9   | ACER SACCHARUM               | 1.23                 | 0.00   | 0.00   | 1.70   | 0.56   | 0.00   |
| 10  | QUERCUS                      | 35.58                | 26.80  | 37.41  | 37.50  | 46.07  | 33.00  |
| 11  | CASTANEA                     | 1.23                 | 0.00   | 0.00   | 1.15   | 0.81   | 0.00   |
| 12  | CARYA                        | 1.23                 | 0.00   | 0.00   | 1.15   | 0.81   | 0.00   |
| 13  | LIQUIDAMBAR                  | 0.00                 | 0.00   | 0.00   | 0.00   | 0.00   | 0.00   |
| 14  | RETULA                       | 0.00                 | 0.00   | 0.00   | 0.00   | 0.00   | 0.00   |
| 15  | JUGLANS UNDIFF.              | 0.00                 | 0.00   | 0.00   | 0.00   | 0.00   | 0.00   |
| 16  | JUGLANS CINEREA              | 0.00                 | 0.00   | 0.00   | 0.00   | 0.00   | 0.00   |
| 17  | JUGLANS NIGRA                | 0.00                 | 0.00   | 0.00   | 0.00   | 0.00   | 0.00   |
| 18  | FRAXINUS PENNSYLVANICA-TYPE  | 0.00                 | 0.00   | 0.00   | 0.00   | 0.00   | 0.00   |
| 19  | FRAXINUS NIGRA-TYPE          | 1.23                 | 0.00   | 0.00   | 0.00   | 0.00   | 0.00   |
| 20  | ULMUS                        | 0.00                 | 0.00   | 0.00   | 0.00   | 0.00   | 0.00   |
| 21  | OSTRYA/CARPINUS              | 0.00                 | 0.00   | 0.00   | 0.00   | 0.00   | 0.00   |
| 22  | ACER RUBRUM                  | 0.00                 | 0.00   | 0.00   | 0.00   | 0.00   | 0.00   |
| 23  | PLATANUS                     | 0.00                 | 0.00   | 0.00   | 0.00   | 0.00   | 0.00   |
| 24  | CORYLUS                      | 0.00                 | 0.00   | 0.00   | 0.00   | 0.00   | 0.00   |
| 25  | AMBROSIA-TYPE                | 17.79                | 34.02  | 9.48   | 8.41   | 11.24  | 13.42  |
| 26  | RUMEX                        | 0.00                 | 7.22   | 2.99   | 3.41   | 1.56   | 1.57   |
| 27  | PLANTAGO LANCEOLATA          | 0.00                 | 1.03   | 0.00   | 0.00   | 0.00   | 0.00   |
| 28  | PLANTAGO MAJOR               | 0.00                 | 0.00   | 0.00   | 0.00   | 0.00   | 0.00   |
| 29  | REGIONAL SUM.                | 100.00               | 100.00 | 100.00 | 100.00 | 100.00 | 100.00 |
| 30  | RHAMNUS/VITIS                | 0.00                 | 0.00   | 0.00   | 0.00   | 0.00   | 0.00   |
| 31  | THALICTRUM                   | 0.00                 | 0.00   | 0.00   | 0.00   | 0.00   | 0.00   |
| 32  | IMPATIENS                    | 0.00                 | 0.00   | 0.00   | 0.00   | 0.00   | 0.00   |
| 33  | URTICA                       | 0.00                 | 0.00   | 0.00   | 0.00   | 0.00   | 0.00   |
| 34  | LABIATAE                     | 0.00                 | 0.00   | 0.00   | 0.00   | 0.00   | 0.00   |
| 35  | LYCOPodium UNDIFF.           | 1.23                 | 1.03   | 0.00   | 0.00   | 0.00   | 0.00   |
| 36  | LYCOPodium LUCIDULUM         | 0.00                 | 0.00   | 0.00   | 0.00   | 0.00   | 0.00   |
| 37  | OSMUNDA UNDIFF.              | 3.07                 | 0.00   | 0.00   | 0.00   | 0.00   | 0.00   |
| 38  | SPHAGNUM                     | 1.23                 | 0.00   | 0.00   | 0.00   | 0.00   | 0.00   |
| 39  | PTERIDIUM                    | 1.23                 | 0.00   | 0.00   | 0.00   | 0.00   | 0.00   |
| 40  | ROTRYCHIUM                   | 0.00                 | 0.00   | 0.00   | 0.00   | 0.00   | 0.00   |
| 41  | POTAMOGETON                  | 0.00                 | 0.00   | 0.00   | 0.00   | 0.00   | 0.00   |
| 42  | NUPHAR                       | 0.00                 | 0.00   | 0.00   | 0.00   | 0.00   | 0.00   |
| 43  | HYMPHAEA                     | 0.00                 | 0.00   | 0.00   | 0.00   | 0.00   | 0.00   |
| 44  | CYPHALANTHUS                 | 0.00                 | 0.00   | 0.00   | 0.00   | 0.00   | 0.00   |
| 45  | NYSSA                        | 0.00                 | 0.00   | 0.00   | 0.00   | 0.00   | 0.00   |
| 46  | SALIX                        | 0.00                 | 0.00   | 0.00   | 0.00   | 0.00   | 0.00   |
| 47  | ALNUS CF.                    | 0.00                 | 0.00   | 0.00   | 0.00   | 0.00   | 0.00   |
| 48  | ILEX                         | 0.00                 | 0.00   | 0.00   | 0.00   | 0.00   | 0.00   |
| 49  | SPARGANIUM-TYPE              | 15.95                | 11.34  | 0.00   | 0.00   | 0.00   | 0.00   |
| 50  | TYPE A                       | 0.00                 | 0.00   | 0.00   | 0.00   | 0.00   | 0.00   |
| 51  | MONOCLETE SPORE              | 7.98                 | 0.00   | 0.00   | 0.00   | 0.00   | 0.00   |
| 52  | ARTHEMISIA                   | 0.00                 | 0.00   | 0.00   | 0.00   | 0.00   | 0.00   |
| 53  | LIGULIFLORAE                 | 0.00                 | 0.00   | 0.00   | 0.00   | 0.00   | 0.00   |
| 54  | TUBULIFLORAE UNDIFF.         | 0.00                 | 0.00   | 0.00   | 0.00   | 0.00   | 0.00   |
| 55  | TUBULIFLORAE A               | 0.00                 | 0.00   | 0.00   | 0.00   | 0.00   | 0.00   |
| 56  | TUBULIFLORAE B               | 0.00                 | 0.00   | 0.00   | 0.00   | 0.00   | 0.00   |
| 57  | TUBULIFLORAE C               | 0.00                 | 0.00   | 0.00   | 0.00   | 0.00   | 0.00   |
| 58  | LYCOPodium ANNOTINUM         | 0.00                 | 0.00   | 0.00   | 0.00   | 0.00   | 0.00   |
| 59  | LYCOPodium TRISTACHYUM       | 0.00                 | 0.00   | 0.00   | 0.00   | 0.00   | 0.00   |
| 60  | LYCOPodium INUNDATUM         | 0.00                 | 0.00   | 0.00   | 0.00   | 0.00   | 0.00   |
| 61  | POLYGONUM LAPATHIFOLIUM-TYPE | 0.00                 | 0.00   | 0.00   | 0.00   | 0.00   | 0.00   |
| 62  | POLYGONACEAE                 | 0.00                 | 0.00   | 0.00   | 0.00   | 0.00   | 0.00   |
| 63  | EPILORIUM                    | 0.00                 | 0.00   | 0.00   | 0.00   | 0.00   | 0.00   |
| 64  | UMPELLIFERAE                 | 0.00                 | 0.00   | 0.00   | 0.00   | 0.00   | 0.00   |
| 65  | CRUCIFERAE                   | 0.00                 | 0.00   | 0.00   | 0.00   | 0.00   | 0.00   |
| 66  | CARYOPHYLLACEAE              | 0.00                 | 0.00   | 0.00   | 0.00   | 0.00   | 0.00   |
| 67  | ERICACEAE                    | 0.00                 | 0.00   | 0.00   | 0.00   | 0.00   | 0.00   |
| 68  | CUPRESSACEAE                 | 0.00                 | 0.00   | 0.00   | 0.00   | 0.00   | 0.00   |
| 69  | ROSACEAE UNDIFF.             | 0.00                 | 0.00   | 0.00   | 0.00   | 0.00   | 0.00   |
| 70  | RHUS                         | 0.00                 | 0.00   | 0.00   | 0.00   | 0.00   | 0.00   |
| 71  | MYRICA-COMPTONIA             | 0.00                 | 0.00   | 0.00   | 0.00   | 0.00   | 0.00   |
| 72  | IVA CF.                      | 0.00                 | 0.00   | 0.00   | 0.00   | 0.00   | 0.00   |
| 73  | CYPERACEAE UNDIFF.           | 0.00                 | 0.00   | 0.00   | 0.00   | 0.00   | 0.00   |
| 74  | CYPERACEAE A                 | 0.00                 | 0.00   | 0.00   | 0.00   | 0.00   | 0.00   |
| 75  | CHENOPodium-TYPE             | 0.00                 | 0.00   | 0.00   | 0.00   | 0.00   | 0.00   |
| 76  | CHENOPodium A                | 0.00                 | 0.00   | 0.00   | 0.00   | 0.00   | 0.00   |
| 77  | CHENOPodium B                | 0.00                 | 0.00   | 0.00   | 0.00   | 0.00   | 0.00   |
| 78  | CHENOPodium C                | 0.00                 | 0.00   | 0.00   | 0.00   | 0.00   | 0.00   |
| 79  | GRAMINAE UNDIFF.             | 0.00                 | 0.00   | 0.00   | 0.00   | 0.00   | 0.00   |
| 80  | RUPPIA                       | 0.00                 | 0.00   | 0.00   | 0.00   | 0.00   | 0.00   |
| 81  | INDETERMINATE/OBSCURE        | 0.00                 | 0.00   | 0.00   | 0.00   | 0.00   | 0.00   |
| 82  | UNKNOWN                      | 0.00                 | 0.00   | 0.00   | 0.00   | 0.00   | 0.00   |

HALLT'S INLET CORE 2

| NO. | TYPE                        | 78    | 86    | 142   | DEF |
|-----|-----------------------------|-------|-------|-------|-----|
| 1   | PINUS HAPLOXYLON            | 6.75  | 0.00  | 0.00  |     |
| 2   | PINUS DIPLOXYLON            | 0.00  | 13.64 | 15.05 |     |
| 3   | TOTAL PINUS                 | 6.75  | 13.64 | 15.05 |     |
| 4   | PICEA                       | 0.00  | 0.00  | 0.00  |     |
| 5   | ABIES                       | 0.00  | 0.00  | 0.00  |     |
| 6   | TSUGA                       | 1.23  | 0.00  | 1.08  |     |
| 7   | FAGUS                       | 0.00  | 1.14  | 1.08  |     |
| 8   | ILIX                        | 1.23  | 0.00  | 0.00  |     |
| 9   | ACER SACCHARUM              | 1.23  | 1.14  | 0.00  |     |
| 10  | QUERCUS                     | 3.41  | 2.27  | 3.23  |     |
| 11  | CASTANEA                    | 3.41  | 2.27  | 2.27  |     |
| 12  | CARYA                       | 2.27  | 2.27  | 2.27  |     |
| 13  | LIQUIDAMBAR                 | 0.00  | 0.00  | 0.00  |     |
| 14  | BETULA                      | 0.00  | 0.00  | 0.00  |     |
| 15  | JUGLANS UNDIFF.             | 0.00  | 0.00  | 0.00  |     |
| 16  | JUGLANS CINEREA             | 0.00  | 0.00  | 0.00  |     |
| 17  | JUGLANS NIGRA               | 1.23  | 0.00  | 2.15  |     |
| 18  | FRAXINUS PENNSYLVANICA-TYPE | 1.23  | 0.00  | 0.00  |     |
| 19  | FRAXINUS NIGRA-TYPE         | 0.00  | 0.00  | 0.00  |     |
| 20  | ILMUS                       | 0.00  | 0.00  | 0.00  |     |
| 21  | OSTRYA CARPINUS             | 0.00  | 1.14  | 1.08  |     |
| 22  | ACER RUPRUM                 | 2.27  | 0.00  | 0.00  |     |
| 23  | PLATANUS                    | 0.00  | 4.41  | 0.00  |     |
| 24  | CORYLUS                     | 0.00  | 0.00  | 0.00  |     |
| 25  | AMBRUSIA-TYPE               | 3.41  | 3.41  | 2.27  |     |
| 26  | RUMEX                       | 4.41  | 5.55  | 2.27  |     |
| 27  | PLANTAGO LANCEOLATA         | 0.00  | 0.00  | 0.00  |     |
| 28  | PLANTAGO MAJOR              | 0.00  | 0.00  | 0.00  |     |
| 29  | REGIONAL SUM                | 10.00 | 10.00 | 10.00 |     |
| 30  | QUAMMUS/VITIS               | 0.00  | 0.00  | 0.00  |     |
| 31  | THALICTRUM                  | 0.00  | 0.00  | 0.00  |     |
| 32  | IMPATIENS                   | 0.00  | 0.00  | 0.00  |     |
| 33  | JRTICA                      | 0.00  | 0.00  | 0.00  |     |
| 34  | LARIATAE                    | 0.00  | 0.00  | 0.00  |     |
| 35  | LYCOPIDIUM UNDIFF.          | 1.23  | 0.00  | 1.08  |     |
| 36  | LYCOPIDIUM LUCIDULUM        | 0.00  | 0.00  | 0.00  |     |
| 37  | OSMUNDA UNDIFF.             | 1.23  | 0.00  | 1.08  |     |
| 38  | SPHAGNUM                    | 1.23  | 1.14  | 0.00  |     |
| 39  | PTERIDIUM                   | 0.00  | 0.00  | 0.00  |     |
| 40  | DIPTERYCIUM                 | 0.00  | 1.14  | 0.00  |     |
| 41  | POTAMOGETON                 | 0.00  | 0.00  | 0.00  |     |
| 42  | UJPHAR                      | 0.00  | 0.00  | 0.00  |     |
| 43  | NYMPHAEA                    | 0.00  | 0.00  | 0.00  |     |
| 44  | CEPHALANTHUS                | 0.00  | 0.00  | 0.00  |     |
| 45  | NYSSA                       | 0.00  | 0.00  | 0.00  |     |
| 46  | SALIX                       | 0.00  | 1.14  | 1.08  |     |
| 47  | ALNUS CF.                   | 0.00  | 1.14  | 1.08  |     |
| 48  | ILEX                        | 0.00  | 0.00  | 0.00  |     |
| 49  | SPARGANIUM-TYPE             | 11.04 | 3.41  | 3.41  |     |
| 50  | TYPHA                       | 1.23  | 0.00  | 3.23  |     |
| 51  | MONOLETE SPORE              | 1.23  | 0.00  | 3.23  |     |
| 52  | ARTHEMISIA                  | 1.23  | 0.00  | 1.08  |     |
| 53  | LIGULIFLORAE                | 0.00  | 0.00  | 0.00  |     |
| 54  | TURBULIFLORAE UNDIFF.       | 2.27  | 2.27  | 3.23  |     |
| 55  | TURBULIFLORAE A             | 0.00  | 0.00  | 0.00  |     |
| 56  | TURBULIFLORAE B             | 0.00  | 0.00  | 0.00  |     |
| 57  | TURBULIFLORAE C             | 0.00  | 0.00  | 0.00  |     |
| 58  | LYCOPIDIUM ANNOTINUM        | 0.00  | 0.00  | 0.00  |     |
| 59  | LYCOPIDIUM TRISTACHYUM      | 0.00  | 0.00  | 0.00  |     |
| 60  | LYCOPIDIUM INUNDATUM        | 0.00  | 0.00  | 0.00  |     |
| 61  | POLYGONACEAE                | 0.00  | 0.00  | 0.00  |     |
| 62  | EPILORIUM                   | 0.00  | 0.00  | 0.00  |     |
| 63  | UMBELLIFERAE                | 0.00  | 0.00  | 0.00  |     |
| 64  | CRUCIFERAE                  | 0.00  | 1.14  | 0.00  |     |
| 65  | CARYOPHYLLACEAE             | 0.00  | 0.00  | 0.00  |     |
| 66  | ERICACEAE                   | 0.00  | 0.00  | 0.00  |     |
| 67  | RUPRESSACEAE                | 0.00  | 0.00  | 0.00  |     |
| 68  | ROSACEAE UNDIFF.            | 0.00  | 0.00  | 0.00  |     |
| 69  | RHUS                        | 1.23  | 0.00  | 0.00  |     |
| 70  | MYRICA-COMPTONIA            | 2.27  | 0.00  | 3.23  |     |
| 71  | TYA CF.                     | 0.00  | 0.00  | 0.00  |     |
| 72  | CYPERACEAE UNDIFF.          | 4.41  | 3.41  | 3.23  |     |
| 73  | CYPERACEAE A                | 55.21 | 4.41  | 2.27  |     |
| 74  | CYPERACEAE B                | 1.23  | 0.00  | 0.00  |     |
| 75  | CYPERACEAE C                | 2.27  | 1.14  | 1.08  |     |
| 76  | CYPERACEAE D                | 0.00  | 0.00  | 0.00  |     |
| 77  | CYPERACEAE E                | 1.23  | 0.00  | 0.00  |     |
| 78  | GRAMINEAE UNDIFF.           | 77.30 | 56.82 | 3.23  |     |
| 79  | RUPPIA                      | 2.27  | 1.14  | 1.08  |     |
| 80  | INDETERMINATE/OSCURE        | 65.03 | 10.00 | 1.08  |     |
| 81  | UNKNOWN                     | 0.00  | 0.00  | 0.00  |     |

## HALLET'S INLET CORE 3

DEP

| NO. | TYPE                         | 78     | 106    | 130    |
|-----|------------------------------|--------|--------|--------|
| 1   | PINUS HAPLOXYLON             | 0.00   | 5.78   | 11.18  |
| 2   | PINUS DIPLOXYLON             | 15.43  | 5.78   | 11.18  |
| 3   | TOTAL PINUS                  | 15.43  | 11.56  | 22.36  |
| 4   | PICEA                        | 1.14   | 1.01   | 2.15   |
| 5   | ABIES                        | 0.00   | 0.00   | 0.00   |
| 6   | TSUGA                        | 1.14   | 2.01   | 1.33   |
| 7   | FAGUS                        | 0.00   | 0.00   | 0.00   |
| 8   | ILLIX                        | 0.00   | 0.00   | 0.00   |
| 9   | ACER SACCHARUM               | 2.29   | 0.00   | 0.00   |
| 10  | QUERCUS                      | 17.14  | 25.13  | 14.47  |
| 11  | CASTANEA                     | 0.00   | 5.03   | 3.95   |
| 12  | CARYA                        | 1.14   | 0.00   | 1.33   |
| 13  | LIQUIDAMBAR                  | 0.00   | 0.00   | 0.00   |
| 14  | RETULA                       | 5.71   | 8.84   | 15.79  |
| 15  | JUGLANS UNDIFF.              | 0.00   | 0.00   | 0.00   |
| 16  | JUGLANS CINEREA              | 1.14   | 0.00   | 1.33   |
| 17  | JUGLANS NIGRA                | 1.14   | 0.00   | 1.33   |
| 18  | FRAXINUS PENNSYLVANICA-TYPE  | 0.00   | 0.00   | 0.00   |
| 19  | FRAXINUS NIGRA-TYPE          | 1.14   | 0.00   | 0.00   |
| 20  | ULMUS                        | 0.00   | 1.01   | 0.00   |
| 21  | OSTRYA/CARPINUS              | 0.00   | 0.00   | 0.00   |
| 22  | ACER RUTINUM                 | 0.00   | 1.01   | 0.00   |
| 23  | PLATANUS                     | 0.00   | 0.00   | 0.00   |
| 24  | CORYLUS                      | 0.00   | 0.00   | 0.00   |
| 25  | AMBROSIA-TYPE                | 46.86  | 35.18  | 23.00  |
| 26  | RUMEX                        | 4.57   | 7.04   | 3.95   |
| 27  | PLANTAGO LANCEOLATA          | 1.14   | 3.00   | 0.00   |
| 28  | PLANTAGO MAJOR               | 0.00   | 0.00   | 0.00   |
| 29  | REGIONAL SUM                 | 100.00 | 180.00 | 180.00 |
| 30  | PHAMNUS/VITIS                | 0.00   | 0.00   | 0.00   |
| 31  | THALICTRUM                   | 0.00   | 0.00   | 0.00   |
| 32  | IMPATIENS                    | 0.00   | 0.00   | 0.00   |
| 33  | URTICA                       | 0.00   | 0.00   | 0.00   |
| 34  | LABIATAE                     | 0.00   | 0.00   | 0.00   |
| 35  | LYCOPODIUM UNDIFF.           | 0.00   | 0.00   | 0.00   |
| 36  | LYCOPODIUM LUCIDULUM         | 0.00   | 0.00   | 0.00   |
| 37  | SMUNDA UNDIFF.               | 0.00   | 0.00   | 1.32   |
| 38  | SPHAGNUM                     | 0.00   | 0.00   | 0.00   |
| 39  | PTERIDIUM                    | 0.00   | 0.00   | 0.00   |
| 40  | BOTRYCHIUM                   | 0.00   | 0.00   | 0.00   |
| 41  | POTAMOGETON                  | 2.29   | 0.00   | 0.00   |
| 42  | NUPHAR                       | 0.00   | 0.00   | 0.00   |
| 43  | NYMPHAEA                     | 0.00   | 0.00   | 0.00   |
| 44  | CEPHALANTHUS                 | 0.00   | 0.00   | 0.00   |
| 45  | NYSSA                        | 0.00   | 0.00   | 0.00   |
| 46  | SALIX                        | 0.00   | 0.00   | 0.00   |
| 47  | ALNUS CF.                    | 3.43   | 1.01   | 0.00   |
| 48  | ILEX                         | 0.00   | 0.00   | 0.00   |
| 49  | SPARGANIUM-TYPE              | 22.86  | 0.00   | 14.47  |
| 50  | MONOLETE SPORE               | 1.14   | 0.00   | 11.18  |
| 51  | ARTEMISIA                    | 4.57   | 3.00   | 3.95   |
| 52  | LIGULIFLORAE                 | 0.00   | 1.01   | 0.00   |
| 53  | TUBULIFLORAE UNDIFF.         | 118.86 | 25.13  | 6.58   |
| 54  | TUBULIFLORAE A               | 0.00   | 1.01   | 0.00   |
| 55  | TUBULIFLORAE B               | 0.00   | 0.00   | 0.00   |
| 56  | TUBULIFLORAE C               | 2.29   | 0.00   | 0.00   |
| 57  | LYCOPODIUM ANNOTINUM         | 0.00   | 0.00   | 0.00   |
| 58  | LYCOPODIUM TRISTACHYUM       | 0.00   | 0.00   | 0.00   |
| 59  | LYCOPODIUM LYNDATIUM         | 0.00   | 0.00   | 0.00   |
| 60  | POLYGONUM LAPATHIFOLIUM-TYPE | 0.00   | 0.00   | 0.00   |
| 61  | POLYGONACEAE                 | 0.00   | 0.00   | 0.00   |
| 62  | EPILOBIUM                    | 0.00   | 0.00   | 0.00   |
| 63  | UMBELLIFERAE                 | 2.29   | 5.03   | 0.00   |
| 64  | CRUCIFERAE                   | 0.00   | 0.00   | 0.00   |
| 65  | CARYOPHYLLACEAE              | 0.00   | 0.00   | 0.00   |
| 66  | ERICACEAE                    | 0.00   | 0.00   | 0.00   |
| 67  | CYPRESSACEAE                 | 0.00   | 0.00   | 0.00   |
| 68  | ROSACEAE UNDIFF.             | 2.29   | 0.00   | 0.00   |
| 69  | RHUS                         | 13.71  | 0.00   | 0.00   |
| 70  | MYRTICA-COMPTONIA            | 46.86  | 0.00   | 0.00   |
| 71  | IVA CF.                      | 1.14   | 2.01   | 0.00   |
| 72  | CYPERACEAE UNDIFF.           | 1.14   | 0.00   | 0.00   |
| 73  | CYPERACEAE A                 | 12.57  | 53.64  | 21.05  |
| 74  | CHENOPODIUM-TYPE             | 3.43   | 2.01   | 0.00   |
| 75  | CHENOPODIUM A                | 3.43   | 0.00   | 0.00   |
| 76  | CHENOPODIUM B                | 0.00   | 0.00   | 0.00   |
| 77  | CHENOPODIUM C                | 0.00   | 0.00   | 0.00   |
| 78  | GRAMINAE UNDIFF.             | 13.71  | 21.05  | 4.57   |
| 79  | PURPTA                       | 0.00   | 0.00   | 0.00   |
| 80  | INDETERMINATE/OBSOLETE       | 12.57  | 34.77  | 11.18  |
| 81  | UNKNOWN                      | 3.43   | 1.01   | 0.00   |

## HALLY'S INLET CORE 4

HALLY'S INLET CORE 4

| NO. | TYPE                          | 293   | 300    | DEPTH |
|-----|-------------------------------|-------|--------|-------|
| 1   | PTNUS HAPLOXYLON              | 0.00  | 7.64   |       |
| 2   | PTNUS DIPLOXYLON              | 0.00  | 23.04  |       |
| 4   | TOTAL PINUS                   | 20.00 | 30.72  |       |
| 5   | PICEA                         | 0.00  | 0.00   |       |
| 6   | TSUGA                         | 0.00  | 0.00   |       |
| 7   | FIGUS                         | 2.22  | 2.61   |       |
| 8   | TILIA                         | 0.00  | 0.00   |       |
| 9   | ACER SACCHARUM                | 0.00  | 0.00   |       |
| 10  | QUERCUS                       | 0.00  | 0.00   |       |
| 11  | CASTANEA                      | 20.00 | 16.99  |       |
| 12  | CARYA                         | 4.44  | 3.92   |       |
| 13  | LIQUIDAMBAR                   | 2.22  | 5.23   |       |
| 14  | BETULA                        | 0.00  | 1.31   |       |
| 15  | JUGLANS UNDIFF.               | 0.00  | 7.84   |       |
| 16  | JUGLANS CINEREA               | 0.00  | 0.00   |       |
| 17  | JUGLANS NIGRA                 | 0.00  | 0.00   |       |
| 18  | FRAXINUS PENNSYLVANICA-TYPE   | 0.00  | 0.00   |       |
| 19  | FRAXINUS NIGRA-TYPE           | 0.00  | 0.00   |       |
| 20  | U. MUS                        | 0.00  | 0.00   |       |
| 21  | OSTRYA/CARPINUS               | 0.00  | 0.00   |       |
| 22  | ACEP. RUBRUM                  | 1.11  | 0.00   |       |
| 23  | PLATANUS                      | 1.11  | 0.00   |       |
| 24  | CORYLUS                       | 0.00  | 0.00   |       |
| 25  | AMEROSIA-TYPE                 | 0.00  | 1.31   |       |
| 26  | OMEX                          | 4.44  | 19.61  |       |
| 27  | PLANTAGO LANCEOLATA           | 1.11  | 2.61   |       |
| 28  | PLANTAGO MAJOR                | 1.11  | 0.00   |       |
| 29  | REGIONAL SUM                  | 0.00  | 0.00   |       |
| 30  | PHAMNUS/VITIS                 | 10.00 | 10.00  |       |
| 31  | THALICTRUM                    | 0.00  | 0.00   |       |
| 32  | IMPATIENS                     | 0.00  | 0.00   |       |
| 33  | URTICA                        | 0.00  | 0.00   |       |
| 34  | LARIATAE                      | 0.00  | 0.00   |       |
| 35  | LYCOPODIUM UNDIFF.            | 0.00  | 0.00   |       |
| 36  | LYCOPODIUM LUTICULUM          | 0.00  | 0.00   |       |
| 37  | SMUNDA UNDIFF.                | 0.00  | 0.00   |       |
| 38  | SPHAGNUM                      | 0.00  | 2.61   |       |
| 39  | PTERIDIUM                     | 1.11  | 0.00   |       |
| 40  | PTIPYCHITUM                   | 0.00  | 0.00   |       |
| 41  | POTAMOGETON                   | 0.00  | 0.00   |       |
| 42  | NYMPHAE                       | 0.00  | 0.00   |       |
| 43  | NYMPHAEA                      | 0.00  | 0.00   |       |
| 44  | CEPHALANTHUS                  | 0.00  | 0.00   |       |
| 45  | YSSA                          | 0.00  | 0.00   |       |
| 46  | SALIX                         | 0.00  | 2.61   |       |
| 47  | ALNUS CF.                     | 2.22  | 0.00   |       |
| 48  | ILIX                          | 0.00  | 0.00   |       |
| 49  | SARGANIUM-TYPE                | 4.44  | 0.00   |       |
| 50  | TYPHA                         | 2.22  | 1.31   |       |
| 51  | MONOTILI SPORF                | 2.22  | 1.31   |       |
| 52  | ARTEMISIA                     | 2.22  | 0.00   |       |
| 53  | LIGULIFLORAE                  | 0.00  | 0.00   |       |
| 54  | TURBULIFLORAE UNDIFF.         | 2.22  | 19.61  |       |
| 55  | TURBULIFLORAE A               | 0.00  | 4.15   |       |
| 56  | TURBULIFLORAE B               | 0.00  | 0.00   |       |
| 57  | TURBULIFLORAE C               | 0.00  | 0.00   |       |
| 58  | LYCOPODIUM ANNOTINUM          | 0.00  | 0.00   |       |
| 59  | LYCOPODIUM TRISTACHYUM        | 0.00  | 0.00   |       |
| 60  | LYCOPODIUM INUNDATUM          | 0.00  | 0.00   |       |
| 61  | LYCOPODIUM LAPATHIFOLIUM-TYPE | 0.00  | 1.31   |       |
| 62  | POLYPODIACEAE                 | 0.00  | 0.00   |       |
| 63  | EPILORIUM                     | 0.00  | 0.00   |       |
| 64  | JUNCUS                        | 3.33  | 24.34  |       |
| 65  | JUNCUS                        | 0.00  | 0.00   |       |
| 66  | POACEAE                       | 0.00  | 0.00   |       |
| 67  | POACEAE                       | 0.00  | 0.00   |       |
| 68  | POACEAE                       | 0.00  | 0.00   |       |
| 69  | POACEAE UNDIFF.               | 0.00  | 3.92   |       |
| 70  | POACEAE                       | 0.00  | 3.92   |       |
| 71  | POACEAE                       | 1.11  | 1.31   |       |
| 72  | POACEAE                       | 0.00  | 1.31   |       |
| 73  | POACEAE UNDIFF.               | 2.22  | 5.23   |       |
| 74  | POACEAE                       | 25.33 | 121.07 |       |
| 75  | POACEAE                       | 1.11  | 2.61   |       |
| 76  | POACEAE                       | 1.11  | 1.31   |       |
| 77  | POACEAE                       | 1.11  | 1.31   |       |
| 78  | POACEAE UNDIFF.               | 0.00  | 0.00   |       |
| 79  | POACEAE                       | 15.55 | 75.82  |       |
| 80  | POACEAE                       | 0.00  | 0.00   |       |
| 81  | POACEAE                       | 4.44  | 6.00   |       |

# HALLT'S INLET CORE 5

| NO. | TYPE                        | 12     | 30     |
|-----|-----------------------------|--------|--------|
| 1   | PINUS HAPLOXYLON            | 28.32  | 5.56   |
| 2   | PINUS CIPLEXYLON            | 0.00   | 11.11  |
| 3   | TOTAL PINUS                 | 28.32  | 16.67  |
| 4   | POACEA                      | 1.77   | 0.00   |
| 5   | ARIES                       | 0.00   | 0.00   |
| 6   | TSUGA                       | 3.54   | 0.00   |
| 7   | FAGUS                       | 0.00   | 3.03   |
| 8   | TILIA                       | 0.00   | 0.00   |
| 9   | ACER SACCHARUM              | 2.65   | 0.00   |
| 10  | QUERCUS                     | 32.74  | 3.33   |
| 11  | CASTANEA                    | 1.77   | 4.55   |
| 12  | CARYA                       | 4.42   | 3.03   |
| 13  | LIQUIDAMBAR                 | 0.00   | 1.00   |
| 14  | BETULA                      | 0.00   | 1.00   |
| 15  | JUGLANS UNDIFF.             | 0.00   | 0.00   |
| 16  | JUGLANS CINEREA             | 0.00   | 0.00   |
| 17  | JUGLANS NIGRA               | 0.00   | 0.00   |
| 18  | FRAXINUS PENNSYLVANICA-TYPE | 2.65   | 1.55   |
| 19  | FRAXINUS NIGRA-TYPE         | 0.00   | 0.00   |
| 20  | ULMUS                       | 0.00   | 0.00   |
| 21  | OSTRYA/CARPINUS             | 0.00   | 0.00   |
| 22  | ACER RUBRUM                 | 0.00   | 0.00   |
| 23  | PLATANUS                    | 0.00   | 0.00   |
| 24  | CORYLUS                     | 0.00   | 0.00   |
| 25  | AMROSIA-TYPE                | 11.50  | 13.64  |
| 26  | RUMEX                       | 0.00   | 7.56   |
| 27  | PLANTAGO LANCEOLATA         | 0.00   | 0.00   |
| 28  | PLANTAGO MAJOR              | 0.00   | 0.00   |
| 29  | REGIOLAL SUM                | 100.00 | 100.00 |
| 30  | RHAMNUS/VITIS               | 0.00   | 0.00   |
| 31  | THALICTRUM                  | 0.00   | 0.00   |
| 32  | IMPATIENS                   | 0.00   | 0.00   |
| 33  | URTICA                      | 0.00   | 0.00   |
| 34  | LARIATAC                    | 0.00   | 0.00   |
| 35  | LYCOPODIUM UNDIFF.          | 0.00   | 0.00   |
| 36  | LYCOPODIUM LUCIDULUM        | 0.00   | 0.00   |
| 37  | OSMUNDA UNDIFF.             | 0.00   | 0.00   |
| 38  | SPHAGNUM                    | 0.00   | 1.52   |
| 39  | PTERIDIUM                   | 1.77   | 0.00   |
| 40  | POTAMOGETON                 | 0.00   | 0.00   |
| 41  | NUPHAR                      | 0.00   | 0.00   |
| 42  | NYMPHAEA                    | 0.00   | 0.00   |
| 43  | CEPHALANTHUS                | 0.00   | 0.00   |
| 44  | NYSSA                       | 0.00   | 0.00   |
| 45  | SALIX                       | 0.00   | 0.00   |
| 46  | ALNUS CF.                   | 0.00   | 3.03   |
| 47  | TILEX                       | 0.00   | 0.00   |
| 48  | SPARGANIUM-TYPE             | 5.31   | 3.03   |
| 49  | TYPHA                       | 0.00   | 0.00   |
| 50  | MONOLITE SPORE              | 4.42   | 4.55   |
| 51  | ARTERISTIA                  | 0.00   | 0.00   |
| 52  | LIGULIFLORAE                | 0.00   | 0.00   |
| 53  | TUBULIFLORAE UNDIFF.        | 0.00   | 0.00   |
| 54  | TUBULIFLORAE A              | 0.00   | 17.00  |
| 55  | TUBULIFLORAE B              | 0.00   | 0.00   |
| 56  | TUBULIFLORAE C              | 0.00   | 0.00   |
| 57  | LYCOPODIUM ANNOTINUM        | 0.00   | 0.00   |
| 58  | LYCOPODIUM TRISTACHYUM      | 0.00   | 0.00   |
| 59  | LYCOPODIUM INUNDATUM        | 0.00   | 0.00   |
| 60  | POLYGONACEAE                | 0.00   | 0.00   |
| 61  | PTILODIUM                   | 0.00   | 0.00   |
| 62  | JUGELLIFERAE                | 0.00   | 0.00   |
| 63  | CRUCIFERAE                  | 0.00   | 0.00   |
| 64  | CARYOPHYLLACEAE             | 0.00   | 0.00   |
| 65  | ERICACEAE                   | 0.00   | 0.00   |
| 66  | CUPRESSACEAE                | 0.00   | 0.00   |
| 67  | ROSACEAE UNDIFF.            | 0.00   | 0.00   |
| 68  | RHUS                        | 0.00   | 0.00   |
| 69  | MYRTICA-COMPTONIA           | 1.77   | 0.00   |
| 70  | IVA CF.                     | 0.00   | 0.00   |
| 71  | CYPERACEAE UNDIFF.          | 1.77   | 0.00   |
| 72  | CYPERACEAE A                | 14.16  | 16.67  |
| 73  | CHENOPODIUM-TYPE            | 6.19   | 0.00   |
| 74  | CHENOPODIUM A               | 3.54   | 1.52   |
| 75  | CHENOPODIUM B               | 3.54   | 1.52   |
| 76  | CHENOPODIUM C               | 1.77   | 1.52   |
| 77  | GRAMINAE UNDIFF.            | 23.89  | 6.19   |
| 78  | SUPPIA                      | 2.65   | 4.55   |
| 79  | INDETERMINATE/OSCURE        | 34.61  | 6.19   |
| 80  | UNKNOWN                     | 0.00   | 0.00   |

## HALLY'S CORE 6

## HALLY'S CORE 6

| NO. | TYPE                         | 9     | 16     | 20    | DEPTH OF<br>26 |
|-----|------------------------------|-------|--------|-------|----------------|
| 1   | FINUS HAPLOXYLON             | 9.95  | 9.17   | 8.85  | 19.59          |
| 2   | FINUS DIPLOXYLON             | 0.00  | 0.00   | 0.00  | 19.59          |
| 3   | TOTAL PINUS                  | 9.95  | 9.17   | 17.70 | 39.19          |
| 4   | PTICHIUM                     | 0.45  | 0.00   | 0.00  | 0.00           |
| 5   | ALNUS                        | 0.00  | 0.00   | 0.00  | 0.00           |
| 6   | TSUGA                        | 0.90  | 1.67   | 10.62 | 9.46           |
| 7   | FAGUS                        | 0.00  | 0.00   | 0.00  | 0.00           |
| 8   | TILIA                        | 0.00  | 0.00   | 0.00  | 0.00           |
| 9   | ACER SACCHARUM               | 0.00  | 0.00   | 0.00  | 0.00           |
| 10  | QUERCUS                      | 0.00  | 2.50   | 0.00  | 0.00           |
| 11  | CASTANEA                     | 28.96 | 17.50  | 28.32 | 18.51          |
| 12  | CARYA                        | 0.00  | 4.17   | 0.00  | 6.76           |
| 13  | LICUIDAMBAR                  | 0.90  | 1.67   | 1.77  | 2.70           |
| 14  | BETULA                       | 0.00  | 0.00   | 0.00  | 0.00           |
| 15  | JUGLANS UNDIFF.              | 11.76 | 15.00  | 10.62 | 4.09           |
| 16  | JUGLANS CINEREA              | 0.00  | 0.00   | 0.00  | 0.00           |
| 17  | JUGLANS NIGRA                | 0.00  | 0.00   | 0.00  | 0.00           |
| 18  | FRAXINUS PENNSYLVANICA-TYPE  | 0.00  | 1.67   | 0.88  | 1.35           |
| 19  | FRAXINUS NIGRA-TYPE          | 0.00  | 0.00   | 0.00  | 0.00           |
| 20  | ULMUS                        | 0.00  | 1.67   | 0.00  | 0.00           |
| 21  | CSTRYA/CARPINUS              | 0.00  | 2.50   | 0.00  | 0.00           |
| 22  | ACER RUPRUM                  | 0.00  | 0.00   | 0.00  | 0.00           |
| 23  | PLATANUS                     | 0.90  | 0.83   | 0.88  | 2.70           |
| 24  | CORILUS                      | 2.71  | 0.00   | 0.00  | 1.35           |
| 25  | AMBRROSIA-TYPE               | 2.71  | 0.00   | 0.00  | 1.35           |
| 26  | RUMEX                        | 29.86 | 37.50  | 23.89 | 12.16          |
| 27  | PLANTAGO LANCEOLATA          | 2.71  | 4.17   | 3.54  | 4.05           |
| 28  | PLANTAGO MAJOR               | 7.24  | 0.00   | 0.88  | 1.35           |
| 29  | REGIONAL SUM                 | 0.00  | 0.00   | 0.00  | 0.00           |
| 30  | RHAMNUS/VITIS                | 10.00 | 10.00  | 10.00 | 10.00          |
| 31  | THALICTRUM                   | 0.00  | 0.00   | 32.74 | 0.00           |
| 32  | IMPATIENS                    | 0.00  | 0.00   | 0.00  | 0.00           |
| 33  | URTICA                       | 0.00  | 0.00   | 0.00  | 0.00           |
| 34  | LABIATAE                     | 0.00  | 0.00   | 0.00  | 0.00           |
| 35  | LYCOPODIUM UNDIFF.           | 0.00  | 0.00   | 0.00  | 0.00           |
| 36  | LYCOPODIUM LUCIOLUM          | 0.00  | 0.00   | 0.00  | 0.00           |
| 37  | CSMUNDA UNDIFF.              | 0.00  | 0.00   | 0.00  | 0.00           |
| 38  | SPHAGNUM                     | 0.00  | 0.00   | 0.00  | 1.35           |
| 39  | PTERIDIUM                    | 0.00  | 0.00   | 0.00  | 0.00           |
| 40  | POTRYCHIUM                   | 0.90  | 0.83   | 0.88  | 0.00           |
| 41  | POTAMOGETON                  | 0.00  | 0.00   | 0.00  | 0.00           |
| 42  | NUPHAR                       | 0.90  | 7.50   | 0.00  | 0.00           |
| 43  | NYPHAEA                      | 0.00  | 0.00   | 0.00  | 0.00           |
| 44  | CYPHALANTHUS                 | 0.00  | 0.00   | 0.00  | 0.00           |
| 45  | NYSSA                        | 0.00  | 0.00   | 0.00  | 0.00           |
| 46  | SALIX                        | 0.00  | 0.00   | 0.00  | 0.00           |
| 47  | ALNUS CF.                    | 1.90  | 0.00   | 0.88  | 0.00           |
| 48  | LYFAX                        | 1.81  | 2.50   | 3.54  | 0.00           |
| 49  | PARAGANUM-TYPE               | 0.00  | 0.00   | 0.00  | 0.00           |
| 50  | TYPE                         | 1.81  | 5.83   | 0.88  | 1.35           |
| 51  | MONOCYTE SPORE               | 0.90  | 0.83   | 0.00  | 1.35           |
| 52  | LEUCOMISIA                   | 0.90  | 0.00   | 0.00  | 0.00           |
| 53  | LEUCIFLCRAE                  | 0.90  | 0.00   | 0.00  | 0.00           |
| 54  | TURULIFLCRAE UNDIFF.         | 0.90  | 0.00   | 0.00  | 0.00           |
| 55  | TURULIFLCRAE A               | 15.48 | 7.50   | 2.12  | 13.51          |
| 56  | TURULIFLCRAE B               | 0.00  | 0.83   | 0.00  | 0.00           |
| 57  | TURULIFLCRAE C               | 0.00  | 0.00   | 0.00  | 0.00           |
| 58  | LYCOPODIUM ANNOTINUM         | 0.00  | 0.00   | 0.00  | 0.00           |
| 59  | LYCOPODIUM TAISTACHYUM       | 0.00  | 0.00   | 0.00  | 0.00           |
| 60  | LYCOPODIUM INUNDATUM         | 0.00  | 0.00   | 0.00  | 0.00           |
| 61  | POLYGONUM LAPATHIFOLIUM-TYPE | 0.00  | 0.00   | 0.00  | 0.00           |
| 62  | POLYGONACEAE                 | 0.00  | 0.00   | 0.00  | 0.00           |
| 63  | EPILOBIUM                    | 0.00  | 0.00   | 0.00  | 0.00           |
| 64  | LYELLIFEREAE                 | 0.00  | 0.00   | 0.00  | 0.00           |
| 65  | CYUCIFERAE                   | 0.00  | 0.00   | 0.00  | 0.00           |
| 66  | CARYOPHYLLACEAE              | 0.00  | 0.00   | 0.00  | 0.00           |
| 67  | LYCACEAE                     | 0.00  | 0.00   | 0.00  | 0.00           |
| 68  | MYRSINACEAE                  | 0.00  | 0.00   | 0.00  | 0.00           |
| 69  | LYSACEAE UNDIFF.             | 0.00  | 0.00   | 0.00  | 0.00           |
| 70  | PHUS                         | 0.00  | 0.00   | 0.00  | 1.46           |
| 71  | MYRICA-CRYPTONIA             | 0.00  | 0.83   | 0.00  | 0.00           |
| 72  | IVA CF.                      | 0.90  | 1.67   | 2.65  | 0.00           |
| 73  | CYPERACEAE UNDIFF.           | 0.90  | 0.00   | 0.00  | 0.00           |
| 74  | CYPERACEAE A                 | 0.90  | 0.83   | 0.00  | 0.00           |
| 75  | CHEAPOPODIUM-TYPE            | 91.40 | 190.83 | 50.44 | 121.62         |
| 76  | CHEAPOPODIUM A               | 6.33  | 0.00   | 0.88  | 1.35           |
| 77  | CHEAPOPODIUM B               | 7.24  | 1.67   | 2.65  | 21.62          |
| 78  | CHEAPOPODIUM C               | 5.43  | 0.83   | 0.00  | 1.35           |
| 79  | CHEAPOPODIUM UNDIFF.         | 0.90  | 0.00   | 0.00  | 0.00           |
| 80  | SUPPIA                       | 50.68 | 300.83 | 37.17 | 54.05          |
| 81  | INDETERMINATE/OBSCURE        | 0.00  | 0.00   | 0.00  | 0.00           |
| 82  | UNKNOWN                      | 19.00 | 20.00  | 27.44 | 39.19          |
|     |                              | 0.00  | 1.67   | 0.00  | 0.00           |

HALLEY'S INLET CORE 7

| NO. | TYPE                         | 7      | 16     | 24     |
|-----|------------------------------|--------|--------|--------|
| 1   | PINUS HAPLOXYLON             | 5.02   | 0.00   | 0.00   |
| 2   | PINUS DIPLOXYLON             | 8.78   | 7.33   | 39.33  |
| 3   | TOTAL PINUS                  | 13.79  | 7.33   | 39.33  |
| 4   | PICEA                        | 0.00   | 0.00   | 0.00   |
| 5   | ABIES                        | 0.00   | 0.00   | 0.00   |
| 6   | TSUGA                        | 0.99   | 0.00   | 9.33   |
| 7   | FAGUS                        | 0.49   | 0.00   | 0.00   |
| 8   | TILIA                        | 0.00   | 0.00   | 0.00   |
| 9   | ACER SACCHARUM               | 1.48   | 0.00   | 0.00   |
| 10  | QUERCUS                      | 40.39  | 24.22  | 26.00  |
| 11  | CASTANEA                     | 0.00   | 1.52   | 0.00   |
| 12  | CARYA                        | 0.99   | 1.52   | 0.00   |
| 13  | LIQUIDAMBAR                  | 0.99   | 0.00   | 0.00   |
| 14  | BETULA                       | 15.26  | 12.12  | 4.67   |
| 15  | JUGLANS UNDIFF.              | 0.00   | 0.00   | 0.00   |
| 16  | JUGLANS CINEREA              | 0.00   | 0.00   | 0.00   |
| 17  | JUGLANS NIGRA                | 0.00   | 0.00   | 0.00   |
| 18  | FRAXINUS PENNSYLVANICA-TYPE  | 1.48   | 3.03   | 0.00   |
| 19  | FRAXINUS NIGRA-TYPE          | 1.48   | 0.00   | 0.00   |
| 20  | ULMUS                        | 4.49   | 0.00   | 0.00   |
| 21  | OSTRYA/CARPINUS              | 0.49   | 0.00   | 0.00   |
| 22  | ASPER RUBRUM                 | 3.49   | 0.00   | 0.00   |
| 23  | PLATANUS                     | 1.48   | 0.00   | 0.00   |
| 24  | CORYLUS                      | 0.00   | 0.00   | 0.00   |
| 25  | AMROSIA-TYPE                 | 10.34  | 0.00   | 14.67  |
| 26  | ZUMEX                        | 0.99   | 1.52   | 0.00   |
| 27  | PLANTAGO LANCEOLATA          | 0.00   | 0.00   | 0.00   |
| 28  | PLANTAGO MAJOR               | 0.00   | 0.00   | 0.00   |
| 29  | REGIONAL SUM                 | 100.00 | 100.00 | 100.00 |
| 30  | RHAMNUS/VITIS                | 0.00   | 0.00   | 1.33   |
| 31  | THALICTRUM                   | 0.00   | 0.00   | 0.00   |
| 32  | IMPATIENS                    | 0.00   | 0.00   | 0.00   |
| 33  | URTICA                       | 0.00   | 0.00   | 0.00   |
| 34  | LAPIDATAE                    | 0.00   | 0.00   | 0.00   |
| 35  | LYCOPodium UNDIFF.           | 1.97   | 1.52   | 0.00   |
| 36  | LYCOPodium LUCIDULUM         | 0.00   | 0.00   | 0.00   |
| 37  | OSMUNDA UNDIFF.              | 1.48   | 0.00   | 1.33   |
| 38  | SPHAGNUM                     | 0.00   | 0.00   | 0.00   |
| 39  | PTERIDIUM                    | 0.00   | 0.00   | 0.00   |
| 40  | ROTECHYUM                    | 0.00   | 0.00   | 0.00   |
| 41  | POIANOGETON                  | 0.00   | 1.52   | 0.00   |
| 42  | NUPHAR                       | 0.00   | 0.00   | 0.00   |
| 43  | NYMPHAEA                     | 0.00   | 0.00   | 0.00   |
| 44  | CEPHALANTHUS                 | 0.00   | 0.00   | 0.00   |
| 45  | NYSSA                        | 0.00   | 0.00   | 0.00   |
| 46  | SALIX                        | 0.00   | 0.00   | 0.00   |
| 47  | ALNUS CF.                    | 0.00   | 0.00   | 0.00   |
| 48  | SPARGANIUM-TYPE              | 0.00   | 0.00   | 0.00   |
| 49  | TYPHA                        | 0.00   | 0.00   | 0.00   |
| 50  | MONOLIFF SPORE               | 0.00   | 0.00   | 0.00   |
| 51  | ARTHRISIA                    | 0.00   | 0.00   | 0.00   |
| 52  | LIGULIFLORAE                 | 0.00   | 0.00   | 0.00   |
| 53  | TUBULIFLORAE UNDIFF.         | 7.33   | 1.52   | 1.33   |
| 54  | TUBULIFLORAE A               | 0.00   | 0.00   | 0.00   |
| 55  | TUBULIFLORAE B               | 0.00   | 0.00   | 0.00   |
| 56  | TUBULIFLORAE C               | 0.00   | 0.00   | 0.00   |
| 57  | LYCOPodium ANNOTINUM         | 0.49   | 0.00   | 0.00   |
| 58  | LYCOPodium TRISTACHYUM       | 0.00   | 0.00   | 0.00   |
| 59  | LYCOPodium INUNDATUM         | 0.00   | 0.00   | 0.00   |
| 60  | POLYGONUM LAPATHIFOLIUM-TYPE | 0.00   | 0.00   | 0.00   |
| 61  | POLYGONACEAE                 | 0.00   | 0.00   | 0.00   |
| 62  | EPILC M                      | 0.00   | 0.00   | 0.00   |
| 63  | UMBELLIFERAE                 | 0.00   | 0.00   | 0.00   |
| 64  | CRUCIFERAE                   | 0.00   | 0.00   | 0.00   |
| 65  | CARYOPHYLLACEAE              | 0.00   | 0.00   | 0.00   |
| 66  | ERICACEAE                    | 0.00   | 0.00   | 0.00   |
| 67  | CUPRESSACEAE                 | 0.00   | 0.00   | 0.00   |
| 68  | ROSACEAE UNDIFF.             | 1.48   | 0.00   | 0.00   |
| 69  | RHUS                         | 0.00   | 0.00   | 0.00   |
| 70  | MYRTICA-COMPTONIA            | 0.00   | 0.00   | 0.00   |
| 71  | IVA CF.                      | 1.48   | 0.00   | 0.00   |
| 72  | CYPERACEAE UNDIFF.           | 0.00   | 0.00   | 0.00   |
| 73  | CYPERACEAE A                 | 2.00   | 2.00   | 0.00   |
| 74  | CHENOPodium-TYPE             | 0.00   | 0.00   | 0.00   |
| 75  | CHENOPodium A                | 19.79  | 1.52   | 0.00   |
| 76  | CHENOPodium B                | 0.00   | 0.00   | 0.00   |
| 77  | CHENOPodium C                | 0.00   | 0.00   | 0.00   |
| 78  | GRAMINE UNDIFF.              | 9.49   | 1.52   | 0.00   |
| 79  | RUPPIA                       | 0.00   | 0.00   | 0.00   |
| 80  | INDETERMINATE/OBSOLETE       | 2.00   | 2.00   | 0.00   |
| 81  | UNKNOWN                      | 0.00   | 0.00   | 0.00   |



| NO. | TYPE                        | PERCENT OF |        |        |        |
|-----|-----------------------------|------------|--------|--------|--------|
|     |                             | 2          | 14     | 19     | 25     |
| 1   | PINUS HAPLOXYLON            | 0.00       | 3.46   | 5.79   | 5.27   |
| 2   | PINUS DYPLOXYLON            | 21.00      | 8.64   | 5.79   | 15.80  |
| 3   | TOTAL PINUS                 | 21.00      | 12.10  | 11.58  | 21.07  |
| 4   | PICEA                       | 0.00       | 0.00   | 0.00   | 0.00   |
| 5   | ABIES                       | 0.00       | 0.00   | 0.00   | 0.00   |
| 6   | TSUGA                       | 0.00       | 0.00   | 0.00   | 0.00   |
| 7   | FAGUS                       | 0.00       | 0.00   | 0.00   | 0.00   |
| 8   | TILIA                       | 0.00       | 0.00   | 0.00   | 0.00   |
| 9   | ACER SACCHARUM              | 0.00       | 0.00   | 0.00   | 0.00   |
| 10  | QUERCUS                     | 35.74      | 26.11  | 21.05  | 27.89  |
| 11  | CASTANEA                    | 0.00       | 1.27   | 0.00   | 0.00   |
| 12  | CARYA                       | 2.33       | 0.64   | 0.00   | 0.00   |
| 13  | LIQUIDAMBAR                 | 0.00       | 0.00   | 0.00   | 0.00   |
| 14  | BETULA                      | 14.66      | 13.58  | 6.62   | 6.62   |
| 15  | JUGLANS UNDIFF.             | 0.00       | 0.00   | 0.00   | 0.00   |
| 16  | JUGLANS CIN. REA            | 0.00       | 0.00   | 0.00   | 0.00   |
| 17  | JUGLANS NIGRA               | 0.00       | 0.00   | 0.00   | 0.00   |
| 18  | FRAXINUS PENNSYLVANICA-TYPE | 0.00       | 0.00   | 0.00   | 0.00   |
| 19  | FRAXINUS NIGRA-TYPE         | 0.00       | 0.00   | 0.00   | 0.00   |
| 20  | ULMUS                       | 1.72       | 1.27   | 1.40   | 5.44   |
| 21  | OSTRYA/CARPINUS             | 0.00       | 0.00   | 0.00   | 0.00   |
| 22  | ACER RUBRUM                 | 0.00       | 0.00   | 0.00   | 0.00   |
| 23  | PLATANUS                    | 0.00       | 0.00   | 0.00   | 0.00   |
| 24  | CORYLUS                     | 0.00       | 0.00   | 0.00   | 0.00   |
| 25  | AMBROSIA-TYPE               | 10.00      | 34.39  | 42.70  | 24.33  |
| 26  | RUMEX                       | 0.00       | 0.00   | 0.00   | 0.00   |
| 27  | PLANTAGO LANCEOLATA         | 0.00       | 0.00   | 0.00   | 0.00   |
| 28  | PLANTAGO MAJOR              | 0.00       | 0.00   | 0.00   | 0.00   |
| 29  | REGIONAL SUM                | 100.00     | 100.00 | 100.00 | 100.00 |
| 30  | RHAMNUS/VITIS               | 0.00       | 0.00   | 0.00   | 0.00   |
| 31  | THALICTRUM                  | 0.00       | 0.00   | 0.00   | 0.00   |
| 32  | IMPATIENS                   | 0.00       | 0.00   | 0.00   | 0.00   |
| 33  | URTICA                      | 0.00       | 0.00   | 0.00   | 0.00   |
| 34  | LABIATAE                    | 0.00       | 0.00   | 0.00   | 0.00   |
| 35  | LYCOPODIUM UNDIFF.          | 0.00       | 0.00   | 0.00   | 0.00   |
| 36  | LYCOPODIUM LUCIDULUM        | 0.00       | 0.00   | 0.00   | 0.00   |
| 37  | OSMUNDA UNDIFF.             | 0.00       | 0.00   | 0.00   | 0.00   |
| 38  | SPHAGNUM                    | 0.00       | 0.00   | 0.00   | 0.00   |
| 39  | PTERIDIUM                   | 0.00       | 0.00   | 0.00   | 0.00   |
| 40  | DOTRYCHUM                   | 0.00       | 0.00   | 0.00   | 0.00   |
| 41  | POTAMOGETON                 | 0.00       | 0.00   | 0.00   | 0.00   |
| 42  | NUPHAR                      | 0.00       | 0.00   | 0.00   | 0.00   |
| 43  | NYMPHAEA                    | 0.00       | 0.00   | 0.00   | 0.00   |
| 44  | CEPHALANTHUS                | 0.00       | 0.00   | 0.00   | 0.00   |
| 45  | NYSSA                       | 0.00       | 0.00   | 0.00   | 0.00   |
| 46  | SALIX                       | 0.00       | 0.00   | 0.00   | 0.00   |
| 47  | ALNUS CF.                   | 0.00       | 0.00   | 0.00   | 0.00   |
| 48  | ILEX                        | 0.00       | 0.00   | 0.00   | 0.00   |
| 49  | SPARGANIUM-TYPE             | 0.00       | 1.27   | 0.00   | 0.00   |
| 50  | TYPHA                       | 0.00       | 0.00   | 0.00   | 0.00   |
| 51  | MONOLETE SPORE              | 0.00       | 0.00   | 0.00   | 0.00   |
| 52  | ARTEMISIA                   | 0.00       | 0.00   | 0.00   | 0.00   |
| 53  | LIGULIFLORAE UNDIFF.        | 0.00       | 0.00   | 0.00   | 0.00   |
| 54  | TUBULIFLORAE A              | 0.00       | 0.00   | 0.00   | 0.00   |
| 55  | TUBULIFLORAE B              | 0.00       | 0.00   | 0.00   | 0.00   |
| 56  | TUBULIFLORAE C              | 0.00       | 0.00   | 0.00   | 0.00   |
| 57  | LYCOPODIUM ANNOTINUM        | 0.00       | 0.00   | 0.00   | 0.00   |
| 58  | LYCOPODIUM TRISTACHYUM      | 0.00       | 0.00   | 0.00   | 0.00   |
| 59  | LYCOPODIUM LACINIOSUM       | 0.00       | 0.00   | 0.00   | 0.00   |
| 60  | LYCOPODIUM LACINIOSUM-TYPE  | 0.00       | 0.00   | 0.00   | 0.00   |
| 61  | POLYGONACEAE                | 0.00       | 0.00   | 0.00   | 0.00   |
| 62  | PTILODIUM                   | 0.00       | 0.00   | 0.00   | 0.00   |
| 63  | UMBELLIFERAE                | 0.00       | 0.00   | 0.00   | 0.00   |
| 64  | CRUCIFERAE                  | 0.00       | 0.00   | 0.00   | 0.00   |
| 65  | CARYOPHYLLACEAE             | 0.00       | 0.00   | 0.00   | 0.00   |
| 66  | ERICACEAE                   | 0.00       | 0.00   | 0.00   | 0.00   |
| 67  | CUPRESSACEAE                | 0.00       | 0.00   | 0.00   | 0.00   |
| 68  | ROSACEAE UNDIFF.            | 0.00       | 0.00   | 0.00   | 0.00   |
| 69  | RHUS                        | 0.00       | 0.00   | 0.00   | 0.00   |
| 70  | MYRICA-COIPTONIA            | 0.00       | 0.00   | 0.00   | 0.00   |
| 71  | IVA CF.                     | 0.00       | 0.00   | 0.00   | 0.00   |
| 72  | CYPERACEAE UNDIFF.          | 0.00       | 0.00   | 0.00   | 0.00   |
| 73  | CYPERACEAE A                | 0.00       | 0.00   | 0.00   | 0.00   |
| 74  | CHEENOPODIUM-TYPE           | 0.00       | 0.00   | 0.00   | 0.00   |
| 75  | CHEENOPODIUM A              | 0.00       | 0.00   | 0.00   | 0.00   |
| 76  | CHEENOPODIUM B              | 0.00       | 0.00   | 0.00   | 0.00   |
| 77  | CHEENOPODIUM C              | 0.00       | 0.00   | 0.00   | 0.00   |
| 78  | GRAMINAE UNDIFF.            | 0.00       | 0.00   | 0.00   | 0.00   |
| 79  | RUPPIA                      | 0.00       | 0.00   | 0.00   | 0.00   |
| 80  | INDETERMINATE/OBSCURE       | 0.00       | 0.00   | 0.00   | 0.00   |
| 81  | UNKNOWN                     | 0.00       | 0.00   | 0.00   | 0.00   |

| NO. | TYPE                         | 8      | 17     | 21     | 29     | 80     |
|-----|------------------------------|--------|--------|--------|--------|--------|
| 1   | PINUS MARITIMA               | 3.14   | 10.00  | 0.00   | 17.62  | 19.00  |
| 2   | PINUS DIPLOXYLON             | 9.41   | 10.00  | 13.68  | 5.00   | 19.00  |
| 3   | TOTAL PINUS                  | 12.55  | 20.00  | 13.68  | 22.62  | 38.00  |
| 4   | PICEA                        | 0.33   | 1.00   | 0.00   | 0.00   | 0.00   |
| 5   | ABIES                        | 0.00   | 0.00   | 0.00   | 0.00   | 0.00   |
| 6   | TSUGA                        | 1.00   | 0.00   | 0.00   | 0.00   | 0.00   |
| 7   | FAGUS                        | 0.00   | 0.00   | 0.00   | 0.00   | 0.00   |
| 8   | TILIA                        | 0.00   | 0.00   | 0.00   | 0.00   | 0.00   |
| 9   | ACER SACCHARUM               | 0.00   | 0.00   | 4.27   | 0.00   | 0.00   |
| 10  | QUERCUS                      | 27.72  | 20.00  | 34.19  | 32.00  | 50.00  |
| 11  | CASTANEA                     | 1.32   | 1.00   | 1.00   | 1.00   | 0.00   |
| 12  | CAFFEA                       | 0.66   | 1.00   | 3.42   | 0.00   | 0.00   |
| 13  | LIQUIDAMBAR                  | 1.32   | 0.00   | 0.00   | 0.00   | 0.00   |
| 14  | BETULA                       | 0.00   | 1.00   | 4.27   | 0.00   | 0.00   |
| 15  | JUGLANS UNDIFF.              | 0.00   | 0.00   | 0.00   | 0.00   | 0.00   |
| 16  | JUGLANS CINEREA              | 0.00   | 0.00   | 0.00   | 0.00   | 0.00   |
| 17  | JUGLANS NIGRA                | 0.00   | 0.00   | 0.00   | 0.00   | 0.00   |
| 18  | FRAXINUS PENNSYLVANICA-TYPE  | 0.00   | 0.00   | 0.00   | 0.00   | 0.00   |
| 19  | FRAXINUS NIGRA-TYPE          | 0.00   | 0.00   | 0.00   | 0.00   | 0.00   |
| 20  | ULMUS                        | 0.00   | 0.00   | 2.00   | 0.00   | 0.00   |
| 21  | OSTRYA/CARPINUS              | 0.00   | 0.00   | 0.00   | 0.00   | 0.00   |
| 22  | ACER RUBRUM                  | 1.98   | 0.00   | 0.00   | 0.00   | 0.00   |
| 23  | PLATANUS                     | 0.00   | 0.00   | 0.00   | 0.00   | 0.00   |
| 24  | CORYLUS                      | 0.00   | 0.00   | 0.00   | 0.00   | 0.00   |
| 25  | AMRROSTIA-TYPE               | 36.96  | 37.00  | 29.91  | 11.46  | 6.61   |
| 26  | RUMEX                        | 1.98   | 2.00   | 2.56   | 3.44   | 0.00   |
| 27  | PLANTAGO LANCEOLATA          | 0.00   | 0.00   | 0.00   | 0.00   | 0.00   |
| 28  | PLANTAGO MAJOR               | 0.00   | 0.00   | 0.00   | 0.00   | 0.00   |
| 29  | REGIONAL SUM                 | 100.00 | 100.00 | 100.00 | 100.00 | 100.00 |
| 30  | RHAMNUS/VITIS                | 0.00   | 0.00   | 0.00   | 0.00   | 0.00   |
| 31  | THALICTRUM                   | 0.00   | 0.00   | 0.00   | 0.00   | 0.00   |
| 32  | IMPATIENS                    | 0.00   | 0.00   | 0.00   | 0.00   | 0.00   |
| 33  | URTICA                       | 0.00   | 0.00   | 0.00   | 0.00   | 0.00   |
| 34  | LABIATAE                     | 0.00   | 0.00   | 0.00   | 0.00   | 0.00   |
| 35  | LYCOPODIUM UNDIFF.           | 0.00   | 0.00   | 0.00   | 0.00   | 0.00   |
| 36  | LYCOPODIUM LUCICULUM         | 0.00   | 0.00   | 0.00   | 0.00   | 0.00   |
| 37  | OSMUNDA UNDIFF.              | 0.00   | 0.00   | 0.00   | 0.00   | 0.00   |
| 38  | SPHAGNUM                     | 0.00   | 0.00   | 0.00   | 0.00   | 0.00   |
| 39  | PIERIDIUM                    | 0.00   | 0.00   | 0.00   | 0.00   | 0.00   |
| 40  | BOTRYCHUM                    | 0.00   | 0.00   | 0.00   | 0.00   | 0.00   |
| 41  | POTAMOGETON                  | 0.00   | 0.00   | 0.00   | 0.00   | 0.00   |
| 42  | NUPHAR                       | 0.00   | 0.00   | 0.00   | 0.00   | 0.00   |
| 43  | NYMPHAEA                     | 0.00   | 0.00   | 0.00   | 0.00   | 0.00   |
| 44  | CEPHALANTHUS                 | 0.00   | 0.00   | 0.00   | 0.00   | 0.00   |
| 45  | NYSSA                        | 0.00   | 0.00   | 0.00   | 0.00   | 0.00   |
| 46  | SALIX                        | 1.98   | 0.00   | 0.00   | 0.00   | 0.00   |
| 47  | ALNUS CF.                    | 1.98   | 0.00   | 0.00   | 0.00   | 0.00   |
| 48  | ILEX                         | 0.00   | 0.00   | 0.00   | 0.00   | 0.00   |
| 49  | SPARGANIUM-TYPE              | 2.26   | 1.00   | 1.71   | 5.77   | 0.00   |
| 50  | TYPHA                        | 2.26   | 0.00   | 0.00   | 0.00   | 0.00   |
| 51  | MONOCYTE SPORE               | 0.00   | 0.00   | 0.00   | 0.00   | 0.00   |
| 52  | ARTEMISIA                    | 0.00   | 0.00   | 0.00   | 0.00   | 0.00   |
| 53  | LIGULIFLORAE                 | 0.00   | 0.00   | 0.00   | 0.00   | 0.00   |
| 54  | TUBULIFLORAE UNDIFF.         | 4.62   | 4.00   | 3.42   | 2.26   | 0.00   |
| 55  | TUBULIFLORAE A               | 0.00   | 0.00   | 0.00   | 0.00   | 0.00   |
| 56  | TUBULIFLORAE B               | 0.00   | 0.00   | 0.00   | 0.00   | 0.00   |
| 57  | TUBULIFLORAE C               | 0.00   | 0.00   | 0.00   | 0.00   | 0.00   |
| 58  | LYCOPODIUM ANACTINUM         | 0.00   | 0.00   | 0.00   | 0.00   | 0.00   |
| 59  | LYCOPODIUM TRISTACHYUM       | 0.00   | 0.00   | 0.00   | 0.00   | 0.00   |
| 60  | LYCOPODIUM INUNDATUM         | 0.00   | 0.00   | 0.00   | 0.00   | 0.00   |
| 61  | POLYGONUM LAPATHIFOLIUM-TYPE | 0.00   | 0.00   | 0.00   | 0.00   | 0.00   |
| 62  | POLYGONACEAE                 | 0.00   | 0.00   | 0.00   | 0.00   | 0.00   |
| 63  | EPILOBIUM                    | 0.00   | 0.00   | 0.00   | 0.00   | 0.00   |
| 64  | UMBELLIFEREAE                | 0.00   | 0.00   | 0.00   | 0.00   | 0.00   |
| 65  | CRUCIFEREAE                  | 0.00   | 0.00   | 0.00   | 0.00   | 0.00   |
| 66  | CARYOPHYLLACEAE              | 0.00   | 0.00   | 0.00   | 0.00   | 0.00   |
| 67  | ERICACEAE                    | 0.00   | 0.00   | 0.00   | 0.00   | 0.00   |
| 68  | CYPRESSACEAE                 | 0.00   | 0.00   | 0.00   | 0.00   | 0.00   |
| 69  | ROSACEAE UNDIFF.             | 0.00   | 0.00   | 0.00   | 0.00   | 0.00   |
| 70  | RHUS                         | 0.00   | 0.00   | 0.00   | 0.00   | 0.00   |
| 71  | MYRICA-COMPTONIA             | 4.62   | 1.00   | 1.00   | 0.00   | 0.00   |
| 72  | IVA CF.                      | 0.00   | 0.00   | 0.00   | 0.00   | 0.00   |
| 73  | CYPERACEAE UNDIFF.           | 0.00   | 0.00   | 0.00   | 0.00   | 0.00   |
| 74  | CYPERACEAE A                 | 0.00   | 0.00   | 0.00   | 0.00   | 0.00   |
| 75  | CYPERACEAE B                 | 0.00   | 0.00   | 0.00   | 0.00   | 0.00   |
| 76  | CYPERACEAE C                 | 0.00   | 0.00   | 0.00   | 0.00   | 0.00   |
| 77  | GRAMINAE UNDIFF.             | 0.00   | 0.00   | 0.00   | 0.00   | 0.00   |
| 78  | RUPPIA                       | 0.00   | 0.00   | 0.00   | 0.00   | 0.00   |
| 79  | INDETERMINATE/OBSCURE        | 0.00   | 0.00   | 0.00   | 0.00   | 0.00   |
| 80  | UNKNOWN                      | 0.00   | 0.00   | 0.00   | 0.00   | 0.00   |

## LANE'S ISLAND CORE 5

| NO. | TYPE                         | 47     | 54     |
|-----|------------------------------|--------|--------|
| 1   | PINUS HAPLOXYLON             | 8.70   | 19.30  |
| 2   | PINUS DIPLOXYLON             | 6.53   | 0.00   |
| 3   | TOTAL PINUS                  | 15.23  | 19.30  |
| 4   | PICEA                        | 1.23   | 0.00   |
| 5   | ABIES                        | 0.00   | 0.00   |
| 6   | TSUGA                        | 0.00   | 0.00   |
| 7   | FAGUS                        | 0.00   | 0.00   |
| 8   | TILIA                        | 0.00   | 0.00   |
| 9   | ACER SACCHARUM               | 2.06   | 1.32   |
| 10  | QUERCUS                      | 19.34  | 33.33  |
| 11  | CASTANEA                     | 2.06   | 3.88   |
| 12  | CARYA                        | 0.82   | 3.51   |
| 13  | LIQULIDAMBAR                 | 7.41   | 0.44   |
| 14  | BETULA                       | 7.82   | 10.53  |
| 15  | JUGLANS UNDIFF.              | 0.00   | 0.00   |
| 16  | JUGLANS CINEREA              | 0.82   | 0.00   |
| 17  | JUGLANS NIGRA                | 0.41   | 0.44   |
| 18  | FRAXINUS PENNSYLVANICA-TYPE  | 1.23   | 0.00   |
| 19  | FRAXINUS NIGRA-TYPE          | 0.00   | 0.00   |
| 20  | ULMUS                        | 0.41   | 0.44   |
| 21  | CORYLIA/CARPINUS             | 0.41   | 0.00   |
| 22  | ACER RUBRUM                  | 0.41   | 0.44   |
| 23  | PLATANUS                     | 0.41   | 0.00   |
| 24  | CORYLUS                      | 0.00   | 0.00   |
| 25  | AMFOSIA-TYPE                 | 2.39   | 24.56  |
| 26  | FUMEX                        | 1.23   | 1.32   |
| 27  | PLANTAGO LANCEOLATA          | 2.47   | 1.75   |
| 28  | PLANTAGO MAJOR               | 0.00   | 0.00   |
| 29  | REGIONAL SUM                 | 100.00 | 100.00 |
| 30  | PHAMNUS/VITIS                | 0.41   | 0.00   |
| 31  | THALICTRUM                   | 0.00   | 0.00   |
| 32  | IMPATIENS                    | 0.00   | 0.00   |
| 33  | URTICA                       | 0.00   | 0.00   |
| 34  | LARIATAE                     | 1.23   | 0.00   |
| 35  | LYCOPodium UNDIFF.           | 0.00   | 0.00   |
| 36  | LYCOPodium LUCIDULUM         | 0.00   | 0.00   |
| 37  | CSHLMDA UNDIFF.              | 1.65   | 0.44   |
| 38  | SPHAGNUM                     | 0.00   | 0.00   |
| 39  | PTERIDIUM                    | 0.82   | 0.00   |
| 40  | POTAMOGETON                  | 1.23   | 0.88   |
| 41  | NUPIAR                       | 0.00   | 0.00   |
| 42  | NYMPHAEA                     | 0.00   | 0.00   |
| 43  | C. PELLANTHUS                | 0.00   | 0.00   |
| 44  | AYSCA                        | 0.00   | 0.00   |
| 45  | SALIX                        | 0.00   | 0.00   |
| 46  | ALNUS CF.                    | 0.82   | 0.88   |
| 47  | ILEX                         | 0.41   | 0.00   |
| 48  | LYCOPodium-TYPE              | 5.17   | 0.88   |
| 49  | TYPE A                       | 1.23   | 0.00   |
| 50  | MUSCULITE SPORE              | 12.56  | 2.19   |
| 51  | ASTENTISIA                   | 0.00   | 0.44   |
| 52  | LIGULIFLORAE                 | 0.00   | 0.44   |
| 53  | TUBULIFLORAE UNDIFF.         | 98.33  | 2.19   |
| 54  | TUBULIFLORAE A               | 2.67   | 0.00   |
| 55  | TUBULIFLORAE B               | 0.00   | 0.00   |
| 56  | TUBULIFLORAE C               | 0.00   | 0.00   |
| 57  | LYCOPodium ANNOTINUM         | 0.32   | 0.00   |
| 58  | LYCOPodium TRISTACHYUM       | 0.00   | 0.00   |
| 59  | LYCOPodium INNOCIUM          | 0.00   | 0.00   |
| 60  | POLYGONUM LAPATHIFOLIUM-TYPE | 0.00   | 0.00   |
| 61  | POLYGONACEAE                 | 0.00   | 0.00   |
| 62  | EPILOBIUM                    | 0.82   | 0.00   |
| 63  | UMBELLIFERAE                 | 42.39  | 0.00   |
| 64  | CRUCIFERAE                   | 0.00   | 0.00   |
| 65  | CARYOPHYLLACEAE              | 0.00   | 0.00   |
| 66  | ERICACEAE                    | 0.00   | 0.00   |
| 67  | CUPRESSACEAE                 | 0.00   | 0.44   |
| 68  | ROSACEAE UNDIFF.             | 0.00   | 0.00   |
| 69  | RUBUS                        | 0.82   | 0.00   |
| 70  | MYRICA-CORYMBIA              | 3.29   | 0.88   |
| 71  | IVA CF.                      | 0.41   | 0.00   |
| 72  | CYPERACEAE UNDIFF.           | 6.58   | 0.00   |
| 73  | CYPERACEAE A                 | 236.21 | 1.32   |
| 74  | CHENOPODIUM-TYPE             | 1.23   | 0.00   |
| 75  | CHENOPODIUM A                | 2.47   | 33.77  |
| 76  | CHENOPODIUM B                | 0.41   | 0.00   |
| 77  | CHENOPODIUM C                | 0.00   | 0.44   |
| 78  | CRABINAE UNDIFF.             | 25.10  | 9.21   |
| 79  | RUPPIA                       | 10.00  | 0.00   |
| 80  | INDETERMINATE/OBSCURE        | 16.21  | 48.68  |
| 81  | UNKNOWN                      | 4.93   | 0.00   |

## LANE'S ISLAND CORE 6

DEP

| NC. | TYPE                         | 66     | 69    | 69    |
|-----|------------------------------|--------|-------|-------|
| 1   | PINUS HAPLOXYLON             | 8.39   | 11.85 | 4.16  |
| 2   | PINUS DIPLOXYLON             | 29.37  | 16.53 | 16.85 |
| 22  | TOTAL PINUS                  | 37.76  | 28.38 | 21.01 |
| 3   | PICEA                        | 3.86   | 0.52  | 2.86  |
| 4   | ABIES                        | 0.00   | 0.00  | 0.41  |
| 5   | TSUGA                        | 2.04   | 3.11  | 5.71  |
| 6   | FAGUS                        | 0.00   | 1.84  | 0.00  |
| 7   | QUERCUS                      | 0.00   | 1.00  | 0.82  |
| 8   | TILO                         | 1.02   | 1.04  | 1.54  |
| 9   | ACER SACCHARUM               | 26.53  | 27.98 | 18.78 |
| 10  | QUERCUS                      | 0.00   | 2.07  | 3.27  |
| 11  | CASTANEA                     | 1.02   | 1.04  | 1.23  |
| 12  | CARYA                        | 0.00   | 0.00  | 0.82  |
| 13  | LIQUIDAMBAR                  | 10.20  | 7.25  | 9.80  |
| 14  | BETULA                       | 0.00   | 0.00  | 0.00  |
| 15  | JUGLANS UNDIFF.              | 0.00   | 0.00  | 0.00  |
| 16  | JUGLANS CINEREA              | 0.00   | 0.00  | 0.00  |
| 17  | JUGLANS NIGRA                | 0.00   | 0.00  | 2.15  |
| 18  | FRAXINUS PENNSYLVANICA-TYPE  | 2.04   | 4.15  | 1.74  |
| 19  | FRAXINUS NIGRA-TYPE          | 0.00   | 0.00  | 0.82  |
| 20  | ULMUS                        | 1.02   | 3.11  | 2.45  |
| 21  | OSTRYA/CARPINUS              | 0.00   | 0.00  | 0.00  |
| 22  | ACER RUPESTRIS               | 1.02   | 2.07  | 0.00  |
| 23  | PLATANUS                     | 7.14   | 0.00  | 0.00  |
| 24  | CORYLUS                      | 0.00   | 0.00  | 0.00  |
| 25  | AMBROSIA-TYPE                | 7.14   | 27.98 | 16.74 |
| 26  | RUMEX                        | 0.00   | 2.07  | 4.08  |
| 27  | PLANTAGO LANCEOLATA          | 0.00   | 0.00  | 2.45  |
| 28  | PLANTAGO MAJOR               | 0.00   | 0.00  | 0.00  |
| 29  | REGIONAL SUM                 | 10.88  | 16.88 | 16.00 |
| 30  | RHAMNUS/VITIS                | 0.00   | 0.00  | 0.00  |
| 31  | THALICTRUM                   | 0.00   | 0.00  | 0.00  |
| 32  | IMPATIENS                    | 0.00   | 0.00  | 0.00  |
| 33  | JRRTICA                      | 0.00   | 0.00  | 0.00  |
| 34  | LARIATAE                     | 0.00   | 0.00  | 0.00  |
| 35  | LYCOPodium UNDIFF.           | 0.00   | 0.00  | 0.00  |
| 36  | LYCOPodium LUCIDULUM         | 0.00   | 0.00  | 0.00  |
| 37  | OSMUNDA UNDIFF.              | 0.00   | 0.00  | 0.00  |
| 38  | SPHAGNUM                     | 0.00   | 0.00  | 2.45  |
| 39  | PTERIDIUM                    | 1.02   | 0.00  | 0.00  |
| 40  | ROTRYCHUM                    | 0.00   | 0.00  | 0.00  |
| 41  | POTAMOGETON                  | 0.00   | 0.00  | 0.00  |
| 42  | NUPHAR                       | 0.00   | 0.00  | 0.00  |
| 43  | NYMFAEA                      | 0.00   | 0.00  | 0.00  |
| 44  | CEPHALANTHUS                 | 0.00   | 0.00  | 0.00  |
| 45  | NYSSA                        | 0.00   | 0.00  | 0.00  |
| 46  | SALIX                        | 0.00   | 0.00  | 5.71  |
| 47  | ALNUS CF.                    | 0.00   | 1.04  | 0.00  |
| 48  | ILEX                         | 0.00   | 0.00  | 0.00  |
| 49  | SPARGANIUM-TYPE              | 0.00   | 1.04  | 0.00  |
| 50  | TYPHA                        | 0.00   | 0.00  | 0.00  |
| 51  | MONOLITE SPORE               | 0.00   | 7.25  | 5.71  |
| 52  | ARTEMISIA                    | 0.00   | 0.00  | 0.00  |
| 53  | LIGULIFLORAE                 | 0.00   | 0.00  | 0.00  |
| 54  | TUBULIFLORAE UNDIFF.         | 4.08   | 14.51 | 5.71  |
| 55  | TUBULIFLORAE A               | 0.00   | 2.07  | 4.08  |
| 56  | TUBULIFLORAE B               | 0.00   | 0.00  | 0.00  |
| 57  | TUBULIFLORAE C               | 0.00   | 0.00  | 0.00  |
| 58  | LYCOPodium ANNOTINUM         | 0.00   | 1.04  | 0.00  |
| 59  | LYCOPodium TRISTACHYUM       | 0.00   | 0.00  | 0.00  |
| 60  | LYCOPodium INUNDATUM         | 0.00   | 0.00  | 0.00  |
| 61  | POLYGONUM LAPATHIFOLIUM-TYPE | 0.00   | 0.00  | 0.00  |
| 62  | POLYGONACEAE                 | 0.00   | 0.00  | 0.00  |
| 63  | EPILORIUM                    | 0.00   | 0.00  | 0.00  |
| 64  | UMBELLIFERAE                 | 0.00   | 1.04  | 1.54  |
| 65  | CRUCIFERAE                   | 0.00   | 0.00  | 0.00  |
| 66  | CARYOPHYLLACEAE              | 0.00   | 0.00  | 0.00  |
| 67  | ERICACEAE                    | 0.00   | 0.00  | 0.00  |
| 68  | CUPRESSACEAE                 | 0.00   | 0.00  | 0.00  |
| 69  | ROSACEAE UNDIFF.             | 0.00   | 0.00  | 0.00  |
| 70  | RHUS                         | 0.00   | 0.00  | 0.82  |
| 71  | MYRTICA-COMPTONIA            | 2.04   | 2.07  | 2.45  |
| 72  | IVA CF.                      | 1.02   | 0.00  | 0.00  |
| 73  | CYPERACEAE UNDIFF.           | 0.00   | 1.04  | 4.08  |
| 74  | CYPERACEAE A                 | 0.00   | 4.08  | 21.22 |
| 75  | CHENOPODIUM-TYPE             | 1.02   | 3.11  | 4.08  |
| 76  | CHENOPODIUM A                | 4.08   | 3.11  | 4.08  |
| 77  | CHENOPODIUM B                | 0.00   | 0.00  | 0.00  |
| 78  | CHENOPODIUM C                | 3.06   | 0.00  | 2.45  |
| 79  | GRAMINAE UNDIFF.             | 120.41 | 8.88  | 33.47 |
| 80  | RUPPIA                       | 5.71   | 3.11  | 3.06  |
| 81  | INDETERMINATE/OBSCURE        | 0.00   | 0.00  | 0.00  |
| 82  | UNKNOWN                      | 0.00   | 0.00  | 0.00  |

LANE'S ISLAND CORE 7

LANE'S ISLAND CORE

| NO. | TYPE                         | 21     | 27     |
|-----|------------------------------|--------|--------|
| 1   | PINUS MAPLOXYLON             | 0.00   | 1.09   |
| 2   | PINUS DIPLOXYLON             | 11.59  | 11.97  |
| 3   | TOTAL PINUS                  | 11.59  | 13.06  |
| 4   | PICEA                        | 0.00   | 0.59   |
| 5   | ABIES                        | 0.00   | 0.00   |
| 6   | TSUGA                        | 0.97   | 0.89   |
| 7   | FAGUS                        | 0.00   | 0.00   |
| 8   | TILIA                        | 0.48   | 0.00   |
| 9   | ACER SACCHARUM               | 0.00   | 0.00   |
| 10  | CUSCUTUS                     | 17.39  | 35.91  |
| 11  | CASTANEA                     | 16.28  | 1.83   |
| 12  | CARYA                        | 1.93   | 1.78   |
| 13  | LIQUIDAMBAR                  | 0.48   | 10.00  |
| 14  | BETULA                       | 11.11  | 13.65  |
| 15  | JUGLANS UNDIFF.              | 0.00   | 0.00   |
| 16  | JUGLANS CINEREA              | 0.00   | 0.00   |
| 17  | JUGLANS NIGRA                | 0.00   | 0.30   |
| 18  | FRAXINUS PENNSYLVANICA-TYPE  | 0.48   | 0.00   |
| 19  | FRAXINUS NIGRA-TYPE          | 0.00   | 0.00   |
| 20  | ULMUS                        | 0.97   | 2.67   |
| 21  | OSTRYA/CARPINUS              | 0.00   | 0.89   |
| 22  | ACER RUBRUM                  | 0.00   | 1.19   |
| 23  | FLATANUS                     | 0.00   | 0.30   |
| 24  | CORYLUS                      | 0.00   | 0.00   |
| 25  | AMBROSIA-TYPE                | 42.51  | 23.74  |
| 26  | RUMEX                        | 2.42   | 1.78   |
| 27  | PLANTAGO LANCEOLATA          | 3.38   | 2.37   |
| 28  | PLANTAGO MAJOR               | 0.00   | 0.00   |
| 29  | REGIONAL SUM                 | 100.00 | 100.00 |
| 30  | RHAMNUS/VITIS                | 0.00   | 0.00   |
| 31  | THALICTRUM                   | 0.00   | 0.00   |
| 32  | IMPATIENS                    | 0.00   | 0.00   |
| 33  | URTICA                       | 0.00   | 0.00   |
| 34  | LABIATAE                     | 0.00   | 0.50   |
| 35  | LYCOPODIUM UNDIFF.           | 0.00   | 1.78   |
| 36  | LYCOPODIUM LUCIDULUM         | 0.48   | 0.00   |
| 37  | CSMUNDA UNDIFF.              | 0.48   | 0.30   |
| 38  | SPHAGNUM                     | 0.48   | 0.30   |
| 39  | PTERIDIUM                    | 0.48   | 0.30   |
| 40  | BOTRYCHIUM                   | 0.48   | 0.00   |
| 41  | POTAMOGETON                  | 0.00   | 0.00   |
| 42  | NUPHAR                       | 0.00   | 0.00   |
| 43  | NYMPHAEA                     | 0.00   | 0.00   |
| 44  | CEPHALANTHUS                 | 0.00   | 0.00   |
| 45  | NYSSA                        | 0.00   | 0.59   |
| 46  | SALIX                        | 0.48   | 1.19   |
| 47  | ALNUS CF.                    | 0.48   | 3.26   |
| 48  | ILEX                         | 0.00   | 0.00   |
| 49  | SPARGANIUM-TYPE              | 15.46  | 12.46  |
| 50  | TYPHA                        | 0.48   | 0.30   |
| 51  | MONOCLETE SPORE              | 4.35   | 1.78   |
| 52  | ARTEMISIA                    | 0.00   | 0.00   |
| 53  | LIGULIFLORAE                 | 0.00   | 0.00   |
| 54  | TUBULIFLORAE UNDIFF.         | 17.87  | 6.82   |
| 55  | TUBULIFLORAE A               | 12.56  | 0.30   |
| 56  | TUBULIFLORAE B               | 0.00   | 0.00   |
| 57  | TUBULIFLORAE C               | 0.00   | 0.00   |
| 58  | LYCOPODIUM ANNOTINUM         | 0.00   | 0.00   |
| 59  | LYCOPODIUM TRISTACHYUM       | 0.00   | 0.00   |
| 60  | LYCOPODIUM INUNDATUM         | 6.00   | 0.00   |
| 61  | POLYGONUM LAPATHIFOLIUM-TYPE | 0.00   | 0.00   |
| 62  | POLYGONACEAE                 | 0.00   | 0.00   |
| 63  | EPILOBIUM                    | 0.00   | 0.00   |
| 64  | UMBELLIFERAE                 | 39.61  | 2.08   |
| 65  | CRUCIFERAE                   | 0.00   | 0.00   |
| 66  | CARYOPHYLLACEAE              | 0.00   | 0.00   |
| 67  | ERICACEAE                    | 0.00   | 0.00   |
| 68  | CUPRESSACEAE                 | 33.33  | 1.59   |
| 69  | ROSCACEAE UNDIFF.            | 0.48   | 1.19   |
| 70  | RUUS                         | 0.48   | 1.48   |
| 71  | MYRICA-CCAFONIA              | 0.48   | 2.97   |
| 72  | IVA CF.                      | 0.00   | 0.59   |
| 73  | CYPERACEAE UNDIFF.           | 0.00   | 0.30   |
| 74  | CYPERACEAE A                 | 58.94  | 2.37   |
| 75  | CHEENOPODIUM-TYPE            | 0.00   | 0.89   |
| 76  | CHEENOPODIUM A               | 0.48   | 16.02  |
| 77  | CHEENOPODIUM B               | 0.00   | 0.00   |
| 78  | CHEENOPODIUM C               | 0.00   | 0.59   |
| 79  | GRAMINAE UNDIFF.             | 94.20  | 56.08  |
| 80  | RUPPIA                       | 100.00 | 100.00 |
| 81  | INDETERMINATE/OBSCURE        | 100.00 | 13.65  |
| 82  | UNKNOWN                      | 0.00   | 0.59   |

| TYPE |                               | DEPTH OF SAMPL |       |       |       |       |
|------|-------------------------------|----------------|-------|-------|-------|-------|
|      |                               | 6              | 11    | 17    | 24    | 35    |
| 1    | PINUS HARPOXYLON              | 35.45          | 17.21 | 15.59 | 18.35 | 7.06  |
| 2    | PINUS HARPOXYLON              | 0.00           | 17.21 | 15.59 | 18.35 | 9.42  |
| 3    | TOTAL PINUS                   | 35.45          | 34.43 | 31.18 | 36.70 | 16.48 |
| 4    | ALNUS                         | 0.37           | 0.41  | 0.61  | 0.61  | 0.12  |
| 5    | ALNUS                         | 0.00           | 0.00  | 0.00  | 0.00  | 0.00  |
| 6    | ALNUS                         | 4.48           | 0.00  | 2.00  | 1.99  | 1.23  |
| 7    | ALNUS                         | 0.75           | 0.41  | 0.34  | 0.00  | 0.49  |
| 8    | TILIA                         | 0.00           | 0.00  | 0.00  | 0.00  | 0.00  |
| 9    | ACER SACCHARUM                | 0.00           | 0.00  | 0.00  | 0.00  | 0.00  |
| 10   | CUSCUS                        | 0.00           | 0.00  | 0.00  | 0.00  | 0.00  |
| 11   | CISTACEA                      | 0.00           | 0.00  | 0.00  | 0.00  | 0.00  |
| 12   | CISTACEA                      | 0.00           | 0.00  | 0.00  | 0.00  | 0.00  |
| 13   | LIQIDAMBAR                    | 2.99           | 2.87  | 1.61  | 3.67  | 1.97  |
| 14   | BETULA                        | 0.00           | 0.00  | 0.00  | 0.00  | 0.00  |
| 15   | JUGLANS UNDIFF.               | 0.00           | 5.74  | 0.00  | 13.46 | 0.00  |
| 16   | JUGLANS CINEREA               | 0.00           | 0.00  | 0.00  | 0.00  | 0.00  |
| 17   | JUGLANS NIGRA                 | 0.00           | 0.00  | 0.00  | 0.00  | 0.00  |
| 18   | FRAXINUS PENNSYLVANICA-TYPE   | 0.00           | 0.00  | 0.00  | 0.00  | 0.00  |
| 19   | FRAXINUS NIGRA-TYPE           | 0.00           | 0.00  | 0.00  | 0.00  | 0.00  |
| 20   | ULMUS                         | 0.00           | 0.00  | 0.00  | 0.00  | 0.00  |
| 21   | CORYLIA/CARINUS               | 0.00           | 0.00  | 0.00  | 0.00  | 0.00  |
| 22   | ACEA RUBRUM                   | 0.00           | 0.00  | 0.00  | 0.00  | 0.00  |
| 23   | PANUS                         | 0.00           | 0.00  | 0.00  | 0.00  | 0.00  |
| 24   | CORYLIA                       | 0.00           | 0.00  | 0.00  | 0.00  | 0.00  |
| 25   | AMPHOSTIA-TYPE                | 11.19          | 10.66 | 11.29 | 29.00 | 31.49 |
| 26   | RUMEX                         | 0.00           | 0.00  | 0.00  | 0.00  | 0.00  |
| 27   | PLANTAGO LANCEOLATA           | 0.00           | 0.00  | 0.00  | 0.00  | 0.00  |
| 28   | PLANTAGO MAJOR                | 0.00           | 0.00  | 0.00  | 0.00  | 0.00  |
| 29   | REGIONAL SUM                  | 0.00           | 0.00  | 0.00  | 0.00  | 0.00  |
| 30   | THALICTRUM                    | 0.00           | 0.00  | 0.00  | 0.00  | 0.00  |
| 31   | IMPATIENS                     | 0.00           | 0.00  | 0.00  | 0.00  | 0.00  |
| 32   | LYCOPodium UNDIFF.            | 0.00           | 0.00  | 0.00  | 0.00  | 0.00  |
| 33   | LYCOPodium LUCIDULUM          | 0.00           | 0.00  | 0.00  | 0.00  | 0.00  |
| 34   | OSYRIS UNDIFF.                | 0.00           | 0.00  | 0.00  | 0.00  | 0.00  |
| 35   | SPHAGNUM                      | 1.49           | 1.64  | 1.08  | 1.41  | 0.00  |
| 36   | PTERIDIUM                     | 0.00           | 1.23  | 1.08  | 1.41  | 0.00  |
| 37   | BOTRYCHUM                     | 0.00           | 0.00  | 0.00  | 0.00  | 0.00  |
| 38   | POTAMOGETON                   | 0.00           | 0.00  | 0.00  | 0.00  | 0.00  |
| 39   | NUPHAR                        | 0.00           | 0.00  | 0.00  | 0.00  | 0.00  |
| 40   | NYMPHAEA                      | 0.00           | 0.00  | 0.00  | 0.00  | 0.00  |
| 41   | CEREPALANTHUS                 | 0.00           | 0.00  | 0.00  | 0.00  | 0.00  |
| 42   | NYSSA                         | 0.37           | 0.00  | 0.00  | 0.00  | 0.00  |
| 43   | SALIX                         | 0.75           | 0.00  | 0.00  | 0.00  | 0.00  |
| 44   | ALNUS CF.                     | 2.24           | 1.64  | 1.08  | 1.41  | 0.00  |
| 45   | ILEX                          | 0.00           | 0.00  | 0.00  | 0.00  | 0.00  |
| 46   | SPARGANIUM-TYPE               | 0.37           | 0.00  | 0.00  | 0.00  | 0.00  |
| 47   | TYPHA                         | 0.37           | 0.00  | 0.00  | 0.00  | 0.00  |
| 48   | MONOCLETE SPOLE               | 4.10           | 2.87  | 5.61  | 4.23  | 2.98  |
| 49   | APTEMISIA                     | 0.00           | 0.00  | 0.00  | 0.00  | 0.00  |
| 50   | LIGULIFLORAE                  | 0.00           | 0.00  | 0.00  | 0.00  | 0.00  |
| 51   | TUBULIFLORAE UNDIFF.          | 0.00           | 0.00  | 0.00  | 0.00  | 0.00  |
| 52   | TUBULIFLORAE A                | 0.00           | 0.00  | 0.00  | 0.00  | 0.00  |
| 53   | TUBULIFLORAE B                | 0.00           | 0.00  | 0.00  | 0.00  | 0.00  |
| 54   | TUBULIFLORAE C                | 0.00           | 0.00  | 0.00  | 0.00  | 0.00  |
| 55   | LYCOPodium ANNOTINUM          | 0.00           | 0.00  | 0.00  | 0.00  | 0.00  |
| 56   | LYCOPodium TRISTACHYUM        | 0.00           | 0.00  | 0.00  | 0.00  | 0.00  |
| 57   | LYCOPodium UNDIFF.            | 0.00           | 0.00  | 0.00  | 0.00  | 0.00  |
| 58   | LYCOPodium UNDIFF.            | 0.00           | 0.00  | 0.00  | 0.00  | 0.00  |
| 59   | LYCOPodium UNDIFF.            | 0.00           | 0.00  | 0.00  | 0.00  | 0.00  |
| 60   | POLYPODIUM LEPIDOPHYLLUM-TYPE | 0.00           | 0.00  | 0.00  | 0.00  | 0.00  |
| 61   | POLYPODIUM UNDIFF.            | 0.00           | 0.00  | 0.00  | 0.00  | 0.00  |
| 62   | EPILOBIA                      | 0.00           | 0.00  | 0.00  | 0.00  | 0.00  |
| 63   | URBELLIFERAE                  | 0.00           | 0.00  | 0.00  | 0.00  | 0.00  |
| 64   | CRUCIFERAE                    | 0.00           | 0.00  | 0.00  | 0.00  | 0.00  |
| 65   | CARYOPHYLLACEAE               | 0.00           | 0.00  | 0.00  | 0.00  | 0.00  |
| 66   | ERICACEAE                     | 0.00           | 0.00  | 0.00  | 0.00  | 0.00  |
| 67   | COMPOSITAE                    | 0.00           | 0.00  | 0.00  | 0.00  | 0.00  |
| 68   | POACEAE UNDIFF.               | 0.00           | 0.00  | 0.00  | 0.00  | 0.00  |
| 69   | PHUS                          | 0.00           | 0.00  | 0.00  | 0.00  | 0.00  |
| 70   | MYRICA-COMPTONIA              | 0.00           | 0.00  | 0.00  | 0.00  | 0.00  |
| 71   | IVA CF.                       | 0.00           | 0.00  | 0.00  | 0.00  | 0.00  |
| 72   | CYPERACEAE UNDIFF.            | 0.00           | 0.00  | 0.00  | 0.00  | 0.00  |
| 73   | CYPERACEAE A                  | 0.00           | 0.00  | 0.00  | 0.00  | 0.00  |
| 74   | CHEMOPODIUM-TYPE              | 0.00           | 0.00  | 0.00  | 0.00  | 0.00  |
| 75   | CHEMOPODIUM A                 | 0.00           | 0.00  | 0.00  | 0.00  | 0.00  |
| 76   | CHEMOPODIUM B                 | 0.00           | 0.00  | 0.00  | 0.00  | 0.00  |
| 77   | CHEMOPODIUM C                 | 0.00           | 0.00  | 0.00  | 0.00  | 0.00  |
| 78   | GRANTINAE UNDIFF.             | 0.00           | 0.00  | 0.00  | 0.00  | 0.00  |
| 79   | RUPA                          | 0.00           | 0.00  | 0.00  | 0.00  | 0.00  |
| 80   | INDETERMINATE/OBSCURE         | 0.00           | 0.00  | 0.00  | 0.00  | 0.00  |
| 81   | UNKNOWN                       | 0.00           | 0.00  | 0.00  | 0.00  | 0.00  |

| NO. | TYPE                         | 283    | 289    | 301    |
|-----|------------------------------|--------|--------|--------|
| 1   | PINUS HAPLOXYLON             | 0.00   | 22.64  | 16.93  |
| 2   | PINUS DIPLOXYLON             | 0.00   | 0.00   | 0.00   |
| 3   | REGIONAL SUM                 | 0.00   | 22.64  | 16.93  |
| 4   | PICEA                        | 0.00   | 1.33   | 0.00   |
| 5   | ABIES                        | 0.00   | 0.00   | 0.00   |
| 6   | TSUGA                        | 0.00   | 9.93   | 10.22  |
| 7   | FAGUS                        | 0.00   | 1.23   | 1.92   |
| 8   | TILIA                        | 0.00   | 0.00   | 0.00   |
| 9   | ACER SACCHARUM               | 0.00   | 0.00   | 1.22   |
| 10  | QUERCUS                      | 0.00   | 4.05   | 4.20   |
| 11  | CASTANEA                     | 18.18  | 1.62   | 2.56   |
| 12  | CARYA                        | 27.27  | 3.23   | 1.92   |
| 13  | LIQUIDAMBAR                  | 0.00   | 0.00   | 0.64   |
| 14  | BETULA                       | 0.00   | 12.94  | 6.39   |
| 15  | JUGLANS UNDIFF.              | 0.00   | 0.00   | 0.00   |
| 16  | JUGLANS CINEREA              | 0.00   | 0.00   | 0.00   |
| 17  | JUGLANS NIGRA                | 0.00   | 0.00   | 0.00   |
| 18  | FRAXINUS PENNSYLVANICA-TYPE  | 0.00   | 0.54   | 1.92   |
| 19  | FRAXINUS NIGRA-TYPE          | 0.00   | 0.54   | 0.00   |
| 20  | ILNUS                        | 0.00   | 0.54   | 0.00   |
| 21  | OSTRYA/CARPINUS              | 0.00   | 0.00   | 0.00   |
| 22  | ACER RUBRUM                  | 4.92   | 0.00   | 0.00   |
| 23  | PLATANUS                     | 4.92   | 1.08   | 0.00   |
| 24  | CORYLUS                      | 4.92   | 0.00   | 0.00   |
| 25  | AMBROSIA-TYPE                | 31.82  | 3.23   | 6.39   |
| 26  | RUMEX                        | 0.00   | 0.00   | 0.00   |
| 27  | PLANTAGO LANCEOLATA          | 0.00   | 0.00   | 0.00   |
| 28  | PLANTAGO MAJOR               | 0.00   | 0.00   | 0.00   |
| 29  | SUBS                         | 100.00 | 100.00 | 100.00 |
| 30  | RHAMNUS/VITIS                | 0.00   | 0.00   | 0.00   |
| 31  | THALICTRUM                   | 0.00   | 0.54   | 0.64   |
| 32  | IMPATIENS                    | 0.00   | 0.00   | 0.00   |
| 33  | URTICA                       | 0.00   | 0.00   | 0.00   |
| 34  | LABIATAE                     | 0.00   | 0.00   | 0.00   |
| 35  | LYCOPodium UNDIFF.           | 0.00   | 0.00   | 0.00   |
| 36  | LYCOPodium LUCIDULUM         | 0.00   | 0.00   | 0.00   |
| 37  | OSMUNDA UNDIFF.              | 4.92   | 1.08   | 0.64   |
| 38  | SPHAGNUM                     | 4.92   | 1.62   | 0.00   |
| 39  | PTERIDIUM                    | 0.00   | 0.00   | 0.00   |
| 40  | BOTRYCHIUM                   | 0.00   | 0.00   | 0.00   |
| 41  | POTAMOGETON                  | 0.00   | 0.94   | 0.00   |
| 42  | NUPHAR                       | 0.00   | 0.00   | 0.00   |
| 43  | CEPHALANTHUS                 | 0.00   | 0.00   | 0.00   |
| 44  | NYSSA                        | 0.00   | 0.00   | 0.00   |
| 45  | SALIX                        | 0.00   | 0.00   | 0.00   |
| 46  | ALNUS CF.                    | 4.92   | 1.62   | 1.92   |
| 47  | ILEX                         | 0.00   | 0.00   | 0.00   |
| 48  | SPARGANIUM-TYPE              | 0.00   | 0.54   | 0.00   |
| 49  | TYPHA                        | 0.00   | 0.00   | 0.00   |
| 50  | MONOLETE SPORE               | 13.82  | 5.39   | 0.64   |
| 51  | ARTEMISIA                    | 9.09   | 0.00   | 0.64   |
| 52  | LIGULIFLORAE                 | 0.00   | 0.00   | 0.00   |
| 53  | TUBULIFLORAE UNDIFF.         | 26.64  | 1.78   | 8.31   |
| 54  | TUBULIFLORAE A               | 236.36 | 1.08   | 2.56   |
| 55  | TUBULIFLORAE B               | 0.00   | 0.00   | 0.00   |
| 56  | TUBULIFLORAE C               | 0.00   | 0.00   | 0.00   |
| 57  | LYCOPodium ANNOTINUM         | 0.00   | 0.00   | 0.00   |
| 58  | LYCOPodium TRISTACHYUM       | 0.00   | 0.00   | 0.00   |
| 59  | LYCOPodium INJUNCTUM         | 0.00   | 0.00   | 0.00   |
| 60  | POLYGONUM LAPATHIFOLIUM-TYPE | 0.00   | 0.00   | 0.00   |
| 61  | POLYGONACEAE                 | 0.00   | 0.00   | 0.00   |
| 62  | EPILOBIUM                    | 0.00   | 0.00   | 0.00   |
| 63  | UMBELLIFERAE                 | 0.00   | 0.00   | 0.00   |
| 64  | CRUCIFERAE                   | 0.00   | 0.00   | 0.00   |
| 65  | CARYOPHYLLACEAE              | 0.00   | 0.00   | 0.00   |
| 66  | ERICACEAE                    | 0.00   | 0.00   | 0.00   |
| 67  | CUPRESSACEAE                 | 0.00   | 0.00   | 0.00   |
| 68  | ROSACEAE UNDIFF.             | 0.00   | 0.00   | 0.00   |
| 69  | RHUS                         | 3.82   | 0.00   | 1.08   |
| 70  | MYRICA-COMPTONIA             | 37.82  | 0.00   | 0.00   |
| 71  | IVA CF.                      | 0.00   | 1.40   | 3.08   |
| 72  | CYPERACEAE UNDIFF.           | 13.64  | 1.78   | 1.92   |
| 73  | CYPERACEAE A                 | 26.64  | 1.08   | 2.56   |
| 74  | CHENOPODIUM-TYPE             | 13.64  | 1.08   | 1.92   |
| 75  | CHENOPODIUM A                | 0.00   | 7.55   | 2.56   |
| 76  | CHENOPODIUM B                | 0.00   | 1.08   | 0.00   |
| 77  | CHENOPODIUM C                | 31.82  | 0.54   | 1.08   |
| 78  | GRAMINAE UNDIFF.             | 59.09  | 43.67  | 265.18 |
| 79  | RUPPIA                       | 0.00   | 0.00   | 0.64   |
| 80  | INDETERMINATE/OBSCURE        | 140.91 | 22.64  | 21.09  |
| 81  | UNKNOWN                      | 59.09  | 0.00   | 0.64   |

## WEST OF GUNNING POINT CORE 3

| NC. | TYPE                        | 137   | 258   | 267   | 276   | DEPTH OF SAM |
|-----|-----------------------------|-------|-------|-------|-------|--------------|
| 1   | PINUS HAPLOXYLON            | 7.32  | 11.34 | 3.72  | 12.84 | 14.74        |
| 2   | PINUS DITLOXYLON            | 0.00  | 0.00  | 0.00  | 0.00  | 0.00         |
| 3   | TOTAL PINUS                 | 7.32  | 11.34 | 3.72  | 12.84 | 14.74        |
| 4   | PICEA                       | 0.00  | 0.00  | 0.00  | 0.00  | 0.00         |
| 5   | ARTES                       | 0.00  | 0.00  | 0.00  | 0.00  | 0.00         |
| 6   | TSUGA                       | 0.00  | 0.00  | 0.00  | 0.00  | 0.00         |
| 7   | FAGUS                       | 0.00  | 0.00  | 0.00  | 0.00  | 0.00         |
| 8   | YLLIA                       | 0.00  | 0.00  | 0.00  | 0.00  | 0.00         |
| 9   | ACER SACCHARUM              | 0.00  | 0.00  | 0.00  | 0.00  | 0.00         |
| 10  | QUERCUS                     | 23.61 | 4.00  | 5.00  | 48.16 | 47.76        |
| 11  | CASTANEA                    | 1.36  | 0.00  | 0.00  | 2.19  | 2.04         |
| 12  | CARYA                       | 0.22  | 0.00  | 0.00  | 0.00  | 0.00         |
| 13  | LIGUOAMBAR                  | 0.00  | 0.00  | 0.00  | 0.00  | 0.00         |
| 14  | RETULA                      | 0.00  | 1.97  | 12.00 | 0.00  | 0.00         |
| 15  | JUGLANS UNDIFF.             | 0.00  | 0.00  | 0.00  | 0.00  | 0.00         |
| 16  | JUGLANS CINEREA             | 0.00  | 0.00  | 0.00  | 0.00  | 0.00         |
| 17  | JUGLANS NIGRA               | 0.22  | 0.00  | 0.00  | 0.00  | 0.00         |
| 18  | FRAXINUS PENNSYLVANICA-TYPE | 0.00  | 0.00  | 0.00  | 0.00  | 0.00         |
| 19  | FRAXINUS NIGRA-TYPE         | 0.00  | 0.00  | 0.00  | 0.00  | 0.00         |
| 20  | ULMUS                       | 0.00  | 0.00  | 0.00  | 0.00  | 0.00         |
| 21  | OSTRYA/CARPINUS             | 0.00  | 0.00  | 0.00  | 0.00  | 0.00         |
| 22  | ACER RUBRUM                 | 0.00  | 0.00  | 0.00  | 0.00  | 0.00         |
| 23  | PLATANUS                    | 0.00  | 0.00  | 0.00  | 0.00  | 0.00         |
| 24  | CORYLUS                     | 0.00  | 0.00  | 0.00  | 0.00  | 0.00         |
| 25  | AMBROSIA-TYPE               | 0.12  | 0.00  | 0.00  | 0.00  | 0.00         |
| 26  | RUMEX                       | 0.00  | 0.00  | 0.00  | 0.00  | 0.00         |
| 27  | PLANTAGO LANCEOLATA         | 0.00  | 0.00  | 0.00  | 0.00  | 0.00         |
| 28  | PLANTAGO MAJOR              | 0.00  | 0.00  | 0.00  | 0.00  | 0.00         |
| 29  | REGIONAL SUM                | 18.00 | 18.00 | 18.00 | 18.00 | 18.00        |
| 30  | RHAMNUS/VITIS               | 0.00  | 0.00  | 0.00  | 0.00  | 0.00         |
| 31  | THALICTRUM                  | 0.00  | 0.00  | 0.00  | 0.00  | 0.00         |
| 32  | IMPATIENS                   | 0.00  | 0.00  | 0.00  | 0.00  | 0.00         |
| 33  | URTICA                      | 0.00  | 0.00  | 0.00  | 0.00  | 0.00         |
| 34  | LABIATAE                    | 0.22  | 0.00  | 0.00  | 0.00  | 0.00         |
| 35  | LYCOPODIUM UNDIFF.          | 0.00  | 0.00  | 0.00  | 0.00  | 0.00         |
| 36  | LYCOPODIUM LUCIDULUM        | 0.00  | 0.00  | 0.00  | 0.00  | 0.00         |
| 37  | OSMUNDA UNDIFF.             | 1.22  | 1.68  | 0.00  | 0.00  | 0.00         |
| 38  | SPHAGNUM                    | 0.00  | 0.00  | 0.00  | 0.00  | 0.00         |
| 39  | PTERIDIUM                   | 0.00  | 0.00  | 0.00  | 0.00  | 0.00         |
| 40  | BOTRYCHIUM                  | 0.00  | 0.00  | 0.00  | 0.00  | 0.00         |
| 41  | POTAMOGETON                 | 0.00  | 0.00  | 0.00  | 0.00  | 0.00         |
| 42  | NUPHAR                      | 0.00  | 0.00  | 0.00  | 0.00  | 0.00         |
| 43  | NYMPHAEA                    | 0.00  | 0.00  | 0.00  | 0.00  | 0.00         |
| 44  | CEPHALANTHUS                | 0.00  | 0.00  | 0.00  | 0.00  | 0.00         |
| 45  | NYSSA                       | 0.00  | 0.00  | 0.00  | 0.00  | 0.00         |
| 46  | SALIX                       | 0.00  | 0.00  | 0.00  | 0.00  | 0.00         |
| 47  | ALNUS CF.                   | 0.00  | 0.00  | 0.00  | 0.00  | 0.00         |
| 48  | TIFF.                       | 0.00  | 0.00  | 0.00  | 0.00  | 0.00         |
| 49  | SPARGANIUM-TYPE             | 0.22  | 0.00  | 0.00  | 0.00  | 0.00         |
| 50  | TYPHA                       | 0.00  | 0.00  | 0.00  | 0.00  | 0.00         |
| 51  | MONOLETE SPORE              | 0.00  | 0.00  | 0.00  | 0.00  | 0.00         |
| 52  | ARTEMISIA                   | 0.00  | 0.00  | 0.00  | 0.00  | 0.00         |
| 53  | LIGULIFLORAE                | 0.00  | 0.00  | 0.00  | 0.00  | 0.00         |
| 54  | TURBULIFLORAE UNDIFF.       | 0.00  | 0.00  | 0.00  | 0.00  | 0.00         |
| 55  | TURBULIFLORAE A             | 0.00  | 0.00  | 0.00  | 0.00  | 0.00         |
| 56  | TURBULIFLORAE B             | 0.00  | 0.00  | 0.00  | 0.00  | 0.00         |
| 57  | TURBULIFLORAE C             | 0.00  | 0.00  | 0.00  | 0.00  | 0.00         |
| 58  | LYCOPODIUM PNOTINUM         | 0.00  | 0.00  | 0.00  | 0.00  | 0.00         |
| 59  | LYCOPODIUM TRISTACHYUM      | 0.00  | 0.00  | 0.00  | 0.00  | 0.00         |
| 60  | LYCOPODIUM LANCEOLATUM-TYPE | 0.00  | 0.00  | 0.00  | 0.00  | 0.00         |
| 61  | POLYGONACEAE                | 0.00  | 0.00  | 0.00  | 0.00  | 0.00         |
| 62  | EPILOBIUM                   | 0.00  | 0.00  | 0.00  | 0.00  | 0.00         |
| 63  | UMBELLIFEREAE               | 0.00  | 0.00  | 0.00  | 0.00  | 0.00         |
| 64  | CRUCIFERAE                  | 0.00  | 0.00  | 0.00  | 0.00  | 0.00         |
| 65  | CARYOPHYLLACEAE             | 0.00  | 0.00  | 0.00  | 0.00  | 0.00         |
| 66  | ERICACEAE                   | 0.00  | 0.00  | 0.00  | 0.00  | 0.00         |
| 67  | CUPRESSACEAE                | 0.00  | 0.00  | 0.00  | 0.00  | 0.00         |
| 68  | ROSACEAE UNDIFF.            | 0.00  | 0.00  | 0.00  | 0.00  | 0.00         |
| 69  | RHUS                        | 0.00  | 0.00  | 0.00  | 0.00  | 0.00         |
| 70  | MYRICA-COMPTONIA            | 0.00  | 0.00  | 0.00  | 0.00  | 0.00         |
| 71  | IVA CF.                     | 0.00  | 0.00  | 0.00  | 0.00  | 0.00         |
| 72  | CYPERACEAE UNDIFF.          | 0.00  | 0.00  | 0.00  | 0.00  | 0.00         |
| 73  | CYPERACEAE A                | 0.00  | 0.00  | 0.00  | 0.00  | 0.00         |
| 74  | CHENOPODIUM-TYPE            | 0.00  | 0.00  | 0.00  | 0.00  | 0.00         |
| 75  | CHENOPODIUM A               | 0.00  | 0.00  | 0.00  | 0.00  | 0.00         |
| 76  | CHENOPODIUM B               | 0.00  | 0.00  | 0.00  | 0.00  | 0.00         |
| 77  | CHENOPODIUM C               | 0.00  | 0.00  | 0.00  | 0.00  | 0.00         |
| 78  | GRAMINAE UNDIFF.            | 0.00  | 0.00  | 0.00  | 0.00  | 0.00         |
| 79  | RUPPIA                      | 0.00  | 0.00  | 0.00  | 0.00  | 0.00         |
| 80  | INDETERMINATE/ORSCLEF       | 0.00  | 0.00  | 0.00  | 0.00  | 0.00         |
| 81  | UNKNOWN                     | 0.00  | 0.00  | 0.00  | 0.00  | 0.00         |



| NO. | TYPE                        | DEPTH OF SAMPLE |      |       |      |       |
|-----|-----------------------------|-----------------|------|-------|------|-------|
|     |                             | 64              | 105  | 193   | 199  | 205   |
| 1   | PINUS HAPLOXYLON            | 0.00            | 0.00 | 7.61  | 0.00 | 17.16 |
| 2   | PINUS DIPLOXYLON            | 0.00            | 0.00 | 7.61  | 0.00 | 0.00  |
| 3   | TOTAL PINUS                 | 0.00            | 0.00 | 15.22 | 0.00 | 17.16 |
| 4   | PICEA                       | 0.00            | 0.00 | 0.00  | 0.00 | 0.00  |
| 5   | ABIES                       | 0.00            | 0.00 | 0.00  | 0.00 | 0.00  |
| 6   | TSUGA                       | 0.00            | 0.00 | 0.00  | 0.00 | 0.00  |
| 7   | FAGUS                       | 0.00            | 0.00 | 0.00  | 0.00 | 0.00  |
| 8   | TILIA                       | 0.00            | 0.00 | 0.00  | 0.00 | 0.00  |
| 9   | ACER SACCHARUM              | 0.00            | 0.00 | 0.00  | 0.00 | 0.00  |
| 10  | QUERCUS                     | 0.00            | 0.00 | 0.00  | 0.00 | 0.00  |
| 11  | CASTANEA                    | 0.00            | 0.00 | 0.00  | 0.00 | 0.00  |
| 12  | CARYA                       | 0.00            | 0.00 | 0.00  | 0.00 | 0.00  |
| 13  | LIQUIDAMBAR                 | 0.00            | 0.00 | 0.00  | 0.00 | 0.00  |
| 14  | BETULA                      | 0.00            | 0.00 | 0.00  | 0.00 | 0.00  |
| 15  | JUGLANS UNDIFF.             | 0.00            | 0.00 | 0.00  | 0.00 | 0.00  |
| 16  | JUGLANS CINEREA             | 0.00            | 0.00 | 0.00  | 0.00 | 0.00  |
| 17  | JUGLANS NIGRA               | 0.00            | 0.00 | 0.00  | 0.00 | 0.00  |
| 18  | FRAXINUS PENNSYLVANICA-TYPE | 0.00            | 0.00 | 0.00  | 0.00 | 0.00  |
| 19  | FRAXINUS NIGRA-TYPE         | 0.00            | 0.00 | 0.00  | 0.00 | 0.00  |
| 20  | ULNUS                       | 0.00            | 0.00 | 0.00  | 0.00 | 0.00  |
| 21  | OSTRYA CARPINUS             | 0.00            | 0.00 | 0.00  | 0.00 | 0.00  |
| 22  | ACER RUBRUM                 | 0.00            | 0.00 | 0.00  | 0.00 | 0.00  |
| 23  | PLATANUS                    | 0.00            | 0.00 | 0.00  | 0.00 | 0.00  |
| 24  | CORYLUS                     | 0.00            | 0.00 | 0.00  | 0.00 | 0.00  |
| 25  | AMBROSIA-TYPE               | 63.43           | 0.00 | 0.00  | 0.00 | 0.00  |
| 26  | RUMEX                       | 0.00            | 0.00 | 0.00  | 0.00 | 0.00  |
| 27  | PLANTAGO LANCEOLATA         | 0.00            | 0.00 | 0.00  | 0.00 | 0.00  |
| 28  | PLANTAGO MAJOR              | 0.00            | 0.00 | 0.00  | 0.00 | 0.00  |
| 29  | REGIONAL SUM                | 18.00           | 0.00 | 0.00  | 0.00 | 0.00  |
| 30  | PHANUS VITIS                | 0.00            | 0.00 | 0.00  | 0.00 | 0.00  |
| 31  | THALICTRUM                  | 0.00            | 0.00 | 0.00  | 0.00 | 0.00  |
| 32  | IMPATIENS                   | 0.00            | 0.00 | 0.00  | 0.00 | 0.00  |
| 33  | URTICA                      | 0.00            | 0.00 | 0.00  | 0.00 | 0.00  |
| 34  | LABIATAE                    | 0.00            | 0.00 | 0.00  | 0.00 | 0.00  |
| 35  | LYCOPODIUM UNDIFF.          | 0.00            | 0.00 | 0.00  | 0.00 | 0.00  |
| 36  | LYCOPODIUM LUCIDULUM        | 0.00            | 0.00 | 0.00  | 0.00 | 0.00  |
| 37  | OSHUNDA UNDIFF.             | 0.00            | 0.00 | 0.00  | 0.00 | 0.00  |
| 38  | SPHAGNUM                    | 0.00            | 0.00 | 0.00  | 0.00 | 0.00  |
| 39  | PTERIDIUM                   | 0.00            | 0.00 | 0.00  | 0.00 | 0.00  |
| 40  | BOTRYCHIUM                  | 0.00            | 0.00 | 0.00  | 0.00 | 0.00  |
| 41  | POTAMOGETON                 | 0.00            | 0.00 | 0.00  | 0.00 | 0.00  |
| 42  | NUPHAR                      | 0.00            | 0.00 | 0.00  | 0.00 | 0.00  |
| 43  | NYMPHAEA                    | 0.00            | 0.00 | 0.00  | 0.00 | 0.00  |
| 44  | CEPHALANTHUS                | 0.00            | 0.00 | 0.00  | 0.00 | 0.00  |
| 45  | NYSSA                       | 0.00            | 0.00 | 0.00  | 0.00 | 0.00  |
| 46  | SALIX                       | 0.00            | 0.00 | 0.00  | 0.00 | 0.00  |
| 47  | ALNUS CF.                   | 0.00            | 0.00 | 0.00  | 0.00 | 0.00  |
| 48  | ILEX                        | 0.00            | 0.00 | 0.00  | 0.00 | 0.00  |
| 49  | SPARGANIUM-TYPE             | 24.11           | 0.00 | 0.00  | 0.00 | 0.00  |
| 50  | TYPHA                       | 0.00            | 0.00 | 0.00  | 0.00 | 0.00  |
| 51  | MONOLETE SPORE              | 47.52           | 0.00 | 0.00  | 0.00 | 0.00  |
| 52  | ARTEMISIA                   | 0.00            | 0.00 | 0.00  | 0.00 | 0.00  |
| 53  | LYGULIFLORAE                | 0.00            | 0.00 | 0.00  | 0.00 | 0.00  |
| 54  | TUBULIFLORAE UNDIFF.        | 0.00            | 0.00 | 0.00  | 0.00 | 0.00  |
| 55  | TUBULIFLORAE A              | 0.00            | 0.00 | 0.00  | 0.00 | 0.00  |
| 56  | TUBULIFLORAE B              | 0.00            | 0.00 | 0.00  | 0.00 | 0.00  |
| 57  | TUBULIFLORAE C              | 0.00            | 0.00 | 0.00  | 0.00 | 0.00  |
| 58  | LYCOPODIUM ANNOTINUM        | 0.00            | 0.00 | 0.00  | 0.00 | 0.00  |
| 59  | LYCOPODIUM TRISTACHYUM      | 0.00            | 0.00 | 0.00  | 0.00 | 0.00  |
| 60  | LYCOPODIUM INMYDRIUM        | 0.00            | 0.00 | 0.00  | 0.00 | 0.00  |
| 61  | POLYGONACEAE                | 0.00            | 0.00 | 0.00  | 0.00 | 0.00  |
| 62  | EPILOBIUM                   | 0.00            | 0.00 | 0.00  | 0.00 | 0.00  |
| 63  | UMBELLIFERAE                | 0.00            | 0.00 | 0.00  | 0.00 | 0.00  |
| 64  | CRUCIFERAE                  | 0.00            | 0.00 | 0.00  | 0.00 | 0.00  |
| 65  | CARYOPHYLLACEAE             | 0.00            | 0.00 | 0.00  | 0.00 | 0.00  |
| 66  | ERTCACEAE                   | 0.00            | 0.00 | 0.00  | 0.00 | 0.00  |
| 67  | CUPRESSACEAE                | 0.00            | 0.00 | 0.00  | 0.00 | 0.00  |
| 68  | ROSACEAE UNDIFF.            | 0.00            | 0.00 | 0.00  | 0.00 | 0.00  |
| 69  | RHUS                        | 0.00            | 0.00 | 0.00  | 0.00 | 0.00  |
| 70  | NYRICA-COMPTONIA            | 0.00            | 0.00 | 0.00  | 0.00 | 0.00  |
| 71  | IVA CF.                     | 0.00            | 0.00 | 0.00  | 0.00 | 0.00  |
| 72  | CYPERACEAE UNDIFF.          | 0.00            | 0.00 | 0.00  | 0.00 | 0.00  |
| 73  | CYPERACEAE A                | 0.00            | 0.00 | 0.00  | 0.00 | 0.00  |
| 74  | CHENOPODIUM-TYPE            | 0.00            | 0.00 | 0.00  | 0.00 | 0.00  |
| 75  | CHENOPODIUM A               | 0.00            | 0.00 | 0.00  | 0.00 | 0.00  |
| 76  | CHENOPODIUM B               | 0.00            | 0.00 | 0.00  | 0.00 | 0.00  |
| 77  | CHENOPODIUM C               | 0.00            | 0.00 | 0.00  | 0.00 | 0.00  |
| 78  | GRAMINAE UNDIFF.            | 0.00            | 0.00 | 0.00  | 0.00 | 0.00  |
| 79  | RUPPIA                      | 0.00            | 0.00 | 0.00  | 0.00 | 0.00  |
| 80  | LYCETERMINATE/OBSCURE       | 0.00            | 0.00 | 0.00  | 0.00 | 0.00  |
| 81  | UNKNOWN                     | 0.00            | 0.00 | 0.00  | 0.00 | 0.00  |

## WEST OF GUNNING POINT CORE 5

| NO. | TYPE                         | 96    | 105   | 112   |
|-----|------------------------------|-------|-------|-------|
| 1   | PINUS HAPLOXYLON             | 11.76 | 12.41 | 18.64 |
| 2   | PINUS DIPLOXYLON             | 11.76 | 6.09  | 4.66  |
| 3   | TOTAL PINUS                  | 23.52 | 18.50 | 23.30 |
| 4   | PICEA                        | 1.47  | 0.00  | 0.00  |
| 5   | ABIES                        | 0.00  | 0.00  | 0.00  |
| 6   | TSUGA                        | 4.41  | 0.00  | 0.00  |
| 7   | TAXUS                        | 7.35  | 0.00  | 0.00  |
| 8   | TILIA                        | 0.00  | 0.00  | 0.00  |
| 9   | ACER ACCHARUM                | 0.00  | 0.00  | 0.00  |
| 10  | JUGLANS                      | 50.00 | 49.09 | 43.71 |
| 11  | CORYLIA                      | 2.94  | 0.00  | 0.00  |
| 12  | LIQUIDAMBAR                  | 0.00  | 0.00  | 0.00  |
| 13  | BETULA                       | 0.00  | 0.00  | 13.19 |
| 14  | JUGLANS UNDIFF.              | 0.00  | 0.00  | 0.00  |
| 15  | JUGLANS CINEREA              | 0.00  | 0.00  | 0.00  |
| 16  | JUGLANS NIGRA                | 0.00  | 0.00  | 0.00  |
| 17  | FRAXINUS PENNSYLANICA-TYPE   | 0.00  | 0.00  | 0.00  |
| 18  | FRAXINUS NIGRA-TYPE          | 0.00  | 0.00  | 0.00  |
| 19  | ULMUS                        | 0.00  | 1.19  | 0.00  |
| 20  | OSTEA/CARPINUS               | 0.00  | 0.00  | 0.00  |
| 21  | ACER RUBRUM                  | 0.00  | 0.00  | 0.00  |
| 22  | PLATANUS                     | 0.00  | 0.00  | 0.00  |
| 23  | CORYLUS                      | 0.00  | 0.00  | 0.00  |
| 24  | AMBROSIA-TYPE                | 0.00  | 0.00  | 0.00  |
| 25  | PUMEX                        | 0.00  | 0.00  | 0.00  |
| 26  | P. ANTIAGO LANCEOLATA        | 0.00  | 0.00  | 0.00  |
| 27  | P. ANTIAGO MAJOR             | 0.00  | 0.00  | 0.00  |
| 28  | REGIONAL SUM                 | 10.00 | 10.00 | 10.00 |
| 29  | RHAMNUS VITIS                | 0.00  | 0.00  | 0.00  |
| 30  | THALITRUA                    | 0.00  | 0.00  | 0.00  |
| 31  | IMPATIENS                    | 0.00  | 0.00  | 0.00  |
| 32  | URTICA                       | 0.00  | 0.00  | 0.00  |
| 33  | LABRUM                       | 0.00  | 0.00  | 0.00  |
| 34  | LYCOPodium UNDIFF.           | 0.00  | 0.00  | 0.00  |
| 35  | LYCOPodium LUCIDUM           | 0.00  | 0.00  | 0.00  |
| 36  | OSMUNDA UNDIFF.              | 1.47  | 0.00  | 0.00  |
| 37  | SAGITTARIA                   | 0.00  | 0.00  | 0.00  |
| 38  | PTERIDIUM                    | 0.00  | 0.00  | 0.00  |
| 39  | BOTRYCHIUM                   | 0.00  | 0.00  | 0.00  |
| 40  | POTAMOGETON                  | 0.00  | 0.00  | 0.00  |
| 41  | UJPHAR                       | 0.00  | 0.00  | 0.00  |
| 42  | NYMPHAEA                     | 0.00  | 0.00  | 0.00  |
| 43  | LEPIS ANTHUS                 | 0.00  | 0.00  | 0.00  |
| 44  | NYSSA                        | 0.00  | 0.00  | 0.00  |
| 45  | SALIX                        | 0.00  | 0.00  | 0.00  |
| 46  | ALNUS CF.                    | 0.00  | 0.00  | 0.00  |
| 47  | ILEX                         | 0.00  | 0.00  | 0.00  |
| 48  | SARGANTUM-TYPE               | 0.00  | 0.00  | 0.00  |
| 49  | LYCOPodium                   | 1.47  | 0.00  | 0.00  |
| 50  | MONOTYLE SPORE               | 0.00  | 0.00  | 0.00  |
| 51  | ARTEMISIA                    | 1.47  | 0.00  | 0.00  |
| 52  | LYCOPodium FLOREAE           | 0.00  | 0.00  | 0.00  |
| 53  | TUBULIFLOREAE UNDIFF.        | 13.14 | 17.02 | 4.11  |
| 54  | TUBULIFLOREAE A              | 1.47  | 0.00  | 0.00  |
| 55  | TUBULIFLOREAE B              | 0.00  | 0.00  | 0.00  |
| 56  | TUBULIFLOREAE C              | 0.00  | 0.00  | 0.00  |
| 57  | LYCOPodium ANGIOLEPIDUM      | 0.00  | 0.00  | 0.00  |
| 58  | LYCOPodium TRISTICHYUM       | 0.00  | 0.00  | 0.00  |
| 59  | LYCOPodium INUNDATUM         | 0.00  | 0.00  | 0.00  |
| 60  | POLYPODIUM LIPATIDOLIUM-TYPE | 0.00  | 0.00  | 0.00  |
| 61  | POLYPODIUM                   | 0.00  | 0.00  | 0.00  |
| 62  | ESTERIDIUM                   | 0.00  | 0.00  | 0.00  |
| 63  | UMBELLIFERAE                 | 0.00  | 0.00  | 0.00  |
| 64  | CRUCIFERAE                   | 0.00  | 0.00  | 0.00  |
| 65  | CARYOPHYLLACEAE              | 0.00  | 0.00  | 0.00  |
| 66  | ERICACEAE                    | 0.00  | 0.00  | 0.00  |
| 67  | CUPRESSACEAE                 | 1.47  | 0.00  | 0.00  |
| 68  | ROSACEAE UNDIFF.             | 0.00  | 0.00  | 0.00  |
| 69  | RHUS                         | 0.00  | 0.00  | 0.00  |
| 70  | MYRTACEAE COMPTONIA          | 10.12 | 2.95  | 0.00  |
| 71  | IVA CF.                      | 0.00  | 0.00  | 0.00  |
| 72  | CYPERACEAE UNDIFF.           | 10.29 | 2.40  | 0.00  |
| 73  | CYPERACEAE A                 | 0.00  | 0.00  | 0.00  |
| 74  | CYPERACEAE B                 | 0.00  | 0.00  | 0.00  |
| 75  | CYPERACEAE C                 | 0.00  | 0.00  | 0.00  |
| 76  | CYPERACEAE D                 | 0.00  | 0.00  | 0.00  |
| 77  | CYPERACEAE E                 | 0.00  | 0.00  | 0.00  |
| 78  | CYPERACEAE F                 | 0.00  | 0.00  | 0.00  |
| 79  | CYPERACEAE G                 | 0.00  | 0.00  | 0.00  |
| 80  | CYPERACEAE H                 | 0.00  | 0.00  | 0.00  |
| 81  | CYPERACEAE I                 | 0.00  | 0.00  | 0.00  |
| 82  | CYPERACEAE J                 | 0.00  | 0.00  | 0.00  |
| 83  | CYPERACEAE K                 | 0.00  | 0.00  | 0.00  |
| 84  | CYPERACEAE L                 | 0.00  | 0.00  | 0.00  |
| 85  | CYPERACEAE M                 | 0.00  | 0.00  | 0.00  |
| 86  | CYPERACEAE N                 | 0.00  | 0.00  | 0.00  |
| 87  | CYPERACEAE O                 | 0.00  | 0.00  | 0.00  |
| 88  | CYPERACEAE P                 | 0.00  | 0.00  | 0.00  |
| 89  | CYPERACEAE Q                 | 0.00  | 0.00  | 0.00  |
| 90  | CYPERACEAE R                 | 0.00  | 0.00  | 0.00  |
| 91  | CYPERACEAE S                 | 0.00  | 0.00  | 0.00  |
| 92  | CYPERACEAE T                 | 0.00  | 0.00  | 0.00  |
| 93  | CYPERACEAE U                 | 0.00  | 0.00  | 0.00  |
| 94  | CYPERACEAE V                 | 0.00  | 0.00  | 0.00  |
| 95  | CYPERACEAE W                 | 0.00  | 0.00  | 0.00  |
| 96  | CYPERACEAE X                 | 0.00  | 0.00  | 0.00  |
| 97  | CYPERACEAE Y                 | 0.00  | 0.00  | 0.00  |
| 98  | CYPERACEAE Z                 | 0.00  | 0.00  | 0.00  |
| 99  | CYPERACEAE AA                | 0.00  | 0.00  | 0.00  |
| 100 | CYPERACEAE AB                | 0.00  | 0.00  | 0.00  |
| 101 | CYPERACEAE AC                | 0.00  | 0.00  | 0.00  |
| 102 | CYPERACEAE AD                | 0.00  | 0.00  | 0.00  |
| 103 | CYPERACEAE AE                | 0.00  | 0.00  | 0.00  |
| 104 | CYPERACEAE AF                | 0.00  | 0.00  | 0.00  |
| 105 | CYPERACEAE AG                | 0.00  | 0.00  | 0.00  |
| 106 | CYPERACEAE AH                | 0.00  | 0.00  | 0.00  |
| 107 | CYPERACEAE AI                | 0.00  | 0.00  | 0.00  |
| 108 | CYPERACEAE AJ                | 0.00  | 0.00  | 0.00  |
| 109 | CYPERACEAE AK                | 0.00  | 0.00  | 0.00  |
| 110 | CYPERACEAE AL                | 0.00  | 0.00  | 0.00  |
| 111 | CYPERACEAE AM                | 0.00  | 0.00  | 0.00  |
| 112 | CYPERACEAE AN                | 0.00  | 0.00  | 0.00  |
| 113 | CYPERACEAE AO                | 0.00  | 0.00  | 0.00  |
| 114 | CYPERACEAE AP                | 0.00  | 0.00  | 0.00  |
| 115 | CYPERACEAE AQ                | 0.00  | 0.00  | 0.00  |
| 116 | CYPERACEAE AR                | 0.00  | 0.00  | 0.00  |
| 117 | CYPERACEAE AS                | 0.00  | 0.00  | 0.00  |
| 118 | CYPERACEAE AT                | 0.00  | 0.00  | 0.00  |
| 119 | CYPERACEAE AU                | 0.00  | 0.00  | 0.00  |
| 120 | CYPERACEAE AV                | 0.00  | 0.00  | 0.00  |
| 121 | CYPERACEAE AW                | 0.00  | 0.00  | 0.00  |
| 122 | CYPERACEAE AX                | 0.00  | 0.00  | 0.00  |
| 123 | CYPERACEAE AY                | 0.00  | 0.00  | 0.00  |
| 124 | CYPERACEAE AZ                | 0.00  | 0.00  | 0.00  |
| 125 | CYPERACEAE BA                | 0.00  | 0.00  | 0.00  |
| 126 | CYPERACEAE BB                | 0.00  | 0.00  | 0.00  |
| 127 | CYPERACEAE BC                | 0.00  | 0.00  | 0.00  |
| 128 | CYPERACEAE BD                | 0.00  | 0.00  | 0.00  |
| 129 | CYPERACEAE BE                | 0.00  | 0.00  | 0.00  |
| 130 | CYPERACEAE BF                | 0.00  | 0.00  | 0.00  |
| 131 | CYPERACEAE BG                | 0.00  | 0.00  | 0.00  |
| 132 | CYPERACEAE BH                | 0.00  | 0.00  | 0.00  |
| 133 | CYPERACEAE BI                | 0.00  | 0.00  | 0.00  |
| 134 | CYPERACEAE BJ                | 0.00  | 0.00  | 0.00  |
| 135 | CYPERACEAE BK                | 0.00  | 0.00  | 0.00  |
| 136 | CYPERACEAE BL                | 0.00  | 0.00  | 0.00  |
| 137 | CYPERACEAE BM                | 0.00  | 0.00  | 0.00  |
| 138 | CYPERACEAE BN                | 0.00  | 0.00  | 0.00  |
| 139 | CYPERACEAE BO                | 0.00  | 0.00  | 0.00  |
| 140 | CYPERACEAE BP                | 0.00  | 0.00  | 0.00  |
| 141 | CYPERACEAE BQ                | 0.00  | 0.00  | 0.00  |
| 142 | CYPERACEAE BR                | 0.00  | 0.00  | 0.00  |
| 143 | CYPERACEAE BS                | 0.00  | 0.00  | 0.00  |
| 144 | CYPERACEAE BT                | 0.00  | 0.00  | 0.00  |
| 145 | CYPERACEAE BU                | 0.00  | 0.00  | 0.00  |
| 146 | CYPERACEAE BV                | 0.00  | 0.00  | 0.00  |
| 147 | CYPERACEAE BW                | 0.00  | 0.00  | 0.00  |
| 148 | CYPERACEAE BX                | 0.00  | 0.00  | 0.00  |
| 149 | CYPERACEAE BY                | 0.00  | 0.00  | 0.00  |
| 150 | CYPERACEAE BZ                | 0.00  | 0.00  | 0.00  |
| 151 | CYPERACEAE CA                | 0.00  | 0.00  | 0.00  |
| 152 | CYPERACEAE CB                | 0.00  | 0.00  | 0.00  |
| 153 | CYPERACEAE CC                | 0.00  | 0.00  | 0.00  |
| 154 | CYPERACEAE CD                | 0.00  | 0.00  | 0.00  |
| 155 | CYPERACEAE CE                | 0.00  | 0.00  | 0.00  |
| 156 | CYPERACEAE CF                | 0.00  | 0.00  | 0.00  |
| 157 | CYPERACEAE CG                | 0.00  | 0.00  | 0.00  |
| 158 | CYPERACEAE CH                | 0.00  | 0.00  | 0.00  |
| 159 | CYPERACEAE CI                | 0.00  | 0.00  | 0.00  |
| 160 | CYPERACEAE CJ                | 0.00  | 0.00  | 0.00  |
| 161 | CYPERACEAE CK                | 0.00  | 0.00  | 0.00  |
| 162 | CYPERACEAE CL                | 0.00  | 0.00  | 0.00  |
| 163 | CYPERACEAE CM                | 0.00  | 0.00  | 0.00  |
| 164 | CYPERACEAE CN                | 0.00  | 0.00  | 0.00  |
| 165 | CYPERACEAE CO                | 0.00  | 0.00  | 0.00  |
| 166 | CYPERACEAE CP                | 0.00  | 0.00  | 0.00  |
| 167 | CYPERACEAE CQ                | 0.00  | 0.00  | 0.00  |
| 168 | CYPERACEAE CR                | 0.00  | 0.00  | 0.00  |
| 169 | CYPERACEAE CS                | 0.00  | 0.00  | 0.00  |
| 170 | CYPERACEAE CT                | 0.00  | 0.00  | 0.00  |
| 171 | CYPERACEAE CU                | 0.00  | 0.00  | 0.00  |
| 172 | CYPERACEAE CV                | 0.00  | 0.00  | 0.00  |
| 173 | CYPERACEAE CW                | 0.00  | 0.00  | 0.00  |
| 174 | CYPERACEAE CX                | 0.00  | 0.00  | 0.00  |
| 175 | CYPERACEAE CY                | 0.00  | 0.00  | 0.00  |
| 176 | CYPERACEAE CZ                | 0.00  | 0.00  | 0.00  |
| 177 | CYPERACEAE DA                | 0.00  | 0.00  | 0.00  |
| 178 | CYPERACEAE DB                | 0.00  | 0.00  | 0.00  |
| 179 | CYPERACEAE DC                | 0.00  | 0.00  | 0.00  |
| 180 | CYPERACEAE DD                | 0.00  | 0.00  | 0.00  |
| 181 | CYPERACEAE DE                | 0.00  | 0.00  | 0.00  |
| 182 | CYPERACEAE DF                | 0.00  | 0.00  | 0.00  |
| 183 | CYPERACEAE DG                | 0.00  | 0.00  | 0.00  |
| 184 | CYPERACEAE DH                | 0.00  | 0.00  | 0.00  |
| 185 | CYPERACEAE DI                | 0.00  | 0.00  | 0.00  |
| 186 | CYPERACEAE DJ                | 0.00  | 0.00  | 0.00  |
| 187 | CYPERACEAE DK                | 0.00  | 0.00  | 0.00  |
| 188 | CYPERACEAE DL                | 0.00  | 0.00  | 0.00  |
| 189 | CYPERACEAE DM                | 0.00  | 0.00  | 0.00  |
| 190 | CYPERACEAE DN                | 0.00  | 0.00  | 0.00  |
| 191 | CYPERACEAE DO                | 0.00  | 0.00  | 0.00  |
| 192 | CYPERACEAE DP                | 0.00  | 0.00  | 0.00  |
| 193 | CYPERACEAE DQ                | 0.00  | 0.00  | 0.00  |
| 194 | CYPERACEAE DR                | 0.00  | 0.00  | 0.00  |
| 195 | CYPERACEAE DS                | 0.00  | 0.00  | 0.00  |
| 196 | CYPERACEAE DT                | 0.00  | 0.00  | 0.00  |
| 197 | CYPERACEAE DU                | 0.00  | 0.00  | 0.00  |
| 198 | CYPERACEAE DV                | 0.00  | 0.00  | 0.00  |
| 199 | CYPERACEAE DW                | 0.00  | 0.00  | 0.00  |
| 200 | CYPERACEAE DX                | 0.00  | 0.00  | 0.00  |
| 201 | CYPERACEAE DY                | 0.00  | 0.00  | 0.00  |
| 202 | CYPERACEAE DZ                | 0.00  | 0.00  | 0.00  |
| 203 | CYPERACEAE EA                | 0.00  | 0.00  | 0.00  |
| 204 | CYPERACEAE EB                | 0.00  | 0.00  | 0.00  |
| 205 | CYPERACEAE EC                | 0.00  | 0.00  | 0.00  |
| 206 | CYPERACEAE ED                | 0.00  | 0.00  | 0.00  |
| 207 | CYPERACEAE EE                | 0.00  | 0.00  | 0.00  |
| 208 | CYPERACEAE EF                | 0.00  | 0.00  | 0.00  |
| 209 | CYPERACEAE EG                | 0.00  | 0.00  | 0.00  |
| 210 | CYPERACEAE EH                | 0.00  | 0.00  | 0.00  |
| 211 | CYPERACEAE EI                | 0.00  | 0.00  | 0.00  |
| 212 | CYPERACEAE EJ                | 0.00  | 0.00  | 0.00  |
| 213 | CYPERACEAE EK                | 0.00  | 0.00  | 0.00  |
| 214 | CYPERACEAE EL                | 0.00  | 0.00  | 0.00  |
| 215 | CYPERACEAE EM                | 0.00  | 0.00  | 0.00  |
| 216 | CYPERACEAE EN                | 0.00  | 0.00  | 0.00  |
| 217 | CYPERACEAE EO                | 0.00  | 0.00  | 0.00  |
| 218 | CYPERACEAE EP                | 0.00  | 0.00  | 0.00  |
| 219 | CYPERACEAE EQ                | 0.00  | 0.00  | 0.00  |
| 220 | CYPERACEAE ER                | 0.00  | 0.00  | 0.00  |
| 221 | CYPERACEAE ES                | 0.00  | 0.00  | 0.00  |
| 222 | CYPERACEAE ET                | 0.00  | 0.00  | 0.00  |
| 223 | CYPERACEAE EU                | 0.00  | 0.00  | 0.00  |
| 224 | CYPERACEAE EV                | 0.00  | 0.00  | 0.00  |
| 225 | CYPERACEAE EW                | 0.00  | 0.00  | 0.00  |
| 226 | CYPERACEAE EX                | 0.00  | 0.00  | 0.00  |
| 227 | CYPERACEAE EY                | 0.00  | 0.00  | 0.00  |
| 228 | CYPERACEAE EZ                | 0.00  | 0.00  | 0.00  |
| 229 | CYPERACEAE FA                | 0.00  | 0.00  | 0.00  |
| 230 | CYPERACEAE FB                | 0.00  | 0.00  | 0.00  |
| 231 | CYPERACEAE FC                | 0.00  | 0.00  | 0.00  |
| 232 | CYPERACEAE FD                | 0.00  | 0.00  | 0.00  |
| 233 | CYPERACEAE FE                | 0.00  | 0.00  | 0.00  |
| 234 | CYPERACEAE FF                | 0.00  | 0.00  | 0.00  |
| 235 | CYPERACEAE FG                | 0.00  | 0.00  | 0.00  |
| 236 | CYPERACEAE FH                | 0.00  | 0.00  | 0.00  |
| 237 | CYPERACEAE FI                | 0.00  | 0.00  | 0.00  |
| 238 | CYPERACEAE FJ                | 0.00  | 0.00  | 0.00  |
| 239 | CYPERACEAE FK                | 0.00  | 0.00  | 0.00  |
| 240 | CYPERACEAE FL                | 0.00  | 0.00  | 0.00  |
| 241 | CYPERACEAE FM                | 0.00  | 0.00  | 0.00  |
| 242 | CYPERACEAE FN                | 0.00  | 0.00  | 0.00  |
| 243 | CYPERACEAE FO                |       |       |       |

| NO. | TYPE                        | DEPTH OF SAMPLE |      |       |       |       |
|-----|-----------------------------|-----------------|------|-------|-------|-------|
|     |                             | 186             | 189  | 237   | 241   | 247   |
| 1   | PINUS HARPOXYLON            | 3.61            | 2.15 | 4.86  | 2.56  | 9.04  |
| 2   | PINUS DIPLOXYLON            | 10.04           | 4.04 | 14.04 | 15.04 | 9.04  |
| 3   | TOTAL PINUS                 | 13.65           | 6.19 | 18.90 | 17.60 | 18.08 |
| 4   | PICEA                       | 0.00            | 0.00 | 0.00  | 0.00  | 0.00  |
| 5   | ABIES                       | 0.00            | 0.00 | 0.00  | 0.00  | 0.00  |
| 6   | TSUGA                       | 0.00            | 0.00 | 0.00  | 0.00  | 0.00  |
| 7   | FAGUS                       | 0.00            | 0.00 | 0.00  | 0.00  | 0.00  |
| 8   | TILIA                       | 0.00            | 0.00 | 0.00  | 0.00  | 0.00  |
| 9   | ACER SACCHARUM              | 0.00            | 0.00 | 0.00  | 0.00  | 0.00  |
| 10  | QUERCUS                     | 0.00            | 0.00 | 0.00  | 0.00  | 0.00  |
| 11  | CASTANEA                    | 0.00            | 0.00 | 0.00  | 0.00  | 0.00  |
| 12  | CARYA                       | 0.00            | 0.00 | 0.00  | 0.00  | 0.00  |
| 13  | LIQUIDAMBAR                 | 0.00            | 0.00 | 0.00  | 0.00  | 0.00  |
| 14  | BETULA                      | 0.00            | 0.00 | 0.00  | 0.00  | 0.00  |
| 15  | JUGLANS UNDIFF.             | 0.00            | 0.00 | 0.00  | 0.00  | 0.00  |
| 16  | JUGLANS CINEREA             | 0.00            | 0.00 | 0.00  | 0.00  | 0.00  |
| 17  | JUGLANS NIGRA               | 0.00            | 0.00 | 0.00  | 0.00  | 0.00  |
| 18  | FRAXINUS PENNSYLVANICA-TYPE | 0.00            | 0.00 | 0.00  | 0.00  | 0.00  |
| 19  | FRAXINUS NIGRA-TYPE         | 0.00            | 0.00 | 0.00  | 0.00  | 0.00  |
| 20  | ULMUS                       | 0.00            | 0.00 | 0.00  | 0.00  | 0.00  |
| 21  | OSTEA/CARPINUS              | 0.00            | 0.00 | 0.00  | 0.00  | 0.00  |
| 22  | ACER RUBRUM                 | 0.00            | 0.00 | 0.00  | 0.00  | 0.00  |
| 23  | PLATANUS                    | 0.00            | 0.00 | 0.00  | 0.00  | 0.00  |
| 24  | CORYLUS                     | 0.00            | 0.00 | 0.00  | 0.00  | 0.00  |
| 25  | AMEROSIA-TYPE               | 0.00            | 0.00 | 0.00  | 0.00  | 0.00  |
| 26  | RUNEX                       | 0.00            | 0.00 | 0.00  | 0.00  | 0.00  |
| 27  | PLANTAGO LANCEOLATA         | 0.00            | 0.00 | 0.00  | 0.00  | 0.00  |
| 28  | PLANTAGO MAJOR              | 0.00            | 0.00 | 0.00  | 0.00  | 0.00  |
| 29  | REGIONAL SUM                | 0.00            | 0.00 | 0.00  | 0.00  | 0.00  |
| 30  | RHAMNUS/VITIS               | 0.00            | 0.00 | 0.00  | 0.00  | 0.00  |
| 31  | THALICTRUM                  | 0.00            | 0.00 | 0.00  | 0.00  | 0.00  |
| 32  | IMPATIENS                   | 0.00            | 0.00 | 0.00  | 0.00  | 0.00  |
| 33  | URTICA                      | 0.00            | 0.00 | 0.00  | 0.00  | 0.00  |
| 34  | LABIATAE                    | 0.00            | 0.00 | 0.00  | 0.00  | 0.00  |
| 35  | LYCOPODIUM UNDIFF.          | 0.00            | 0.00 | 0.00  | 0.00  | 0.00  |
| 36  | LYCOPODIUM LUCIDULUM        | 0.00            | 0.00 | 0.00  | 0.00  | 0.00  |
| 37  | OSMUNDA UNDIFF.             | 0.00            | 0.00 | 0.00  | 0.00  | 0.00  |
| 38  | SPHAGNUM                    | 0.00            | 0.00 | 0.00  | 0.00  | 0.00  |
| 39  | PTERIDIUM                   | 0.00            | 0.00 | 0.00  | 0.00  | 0.00  |
| 40  | BOTRYCHUM                   | 0.00            | 0.00 | 0.00  | 0.00  | 0.00  |
| 41  | POTAMOGETON                 | 0.00            | 0.00 | 0.00  | 0.00  | 0.00  |
| 42  | NUPHAR                      | 0.00            | 0.00 | 0.00  | 0.00  | 0.00  |
| 43  | NYMPHAEA                    | 0.00            | 0.00 | 0.00  | 0.00  | 0.00  |
| 44  | CYPHALANTHUS                | 0.00            | 0.00 | 0.00  | 0.00  | 0.00  |
| 45  | NYSSA                       | 0.00            | 0.00 | 0.00  | 0.00  | 0.00  |
| 46  | SALIX                       | 0.00            | 0.00 | 0.00  | 0.00  | 0.00  |
| 47  | ALNUS CF.                   | 0.00            | 0.00 | 0.00  | 0.00  | 0.00  |
| 48  | SPARGANIUM-TYPE             | 0.00            | 0.00 | 0.00  | 0.00  | 0.00  |
| 49  | TYPHA                       | 0.00            | 0.00 | 0.00  | 0.00  | 0.00  |
| 50  | MONOCOTYLEDON               | 0.00            | 0.00 | 0.00  | 0.00  | 0.00  |
| 51  | APT-MISIA                   | 0.00            | 0.00 | 0.00  | 0.00  | 0.00  |
| 52  | LIGULIFLORAE                | 0.00            | 0.00 | 0.00  | 0.00  | 0.00  |
| 53  | TUBULIFLORAE UNDIFF.        | 0.00            | 0.00 | 0.00  | 0.00  | 0.00  |
| 54  | TUBULIFLORAE A              | 0.00            | 0.00 | 0.00  | 0.00  | 0.00  |
| 55  | TUBULIFLORAE B              | 0.00            | 0.00 | 0.00  | 0.00  | 0.00  |
| 56  | TUBULIFLORAE C              | 0.00            | 0.00 | 0.00  | 0.00  | 0.00  |
| 57  | LYCOPODIUM ANNOTINUM        | 0.00            | 0.00 | 0.00  | 0.00  | 0.00  |
| 58  | LYCOPODIUM TRISTACHYUM      | 0.00            | 0.00 | 0.00  | 0.00  | 0.00  |
| 59  | LYCOPODIUM INYVATIUM-TYPE   | 0.00            | 0.00 | 0.00  | 0.00  | 0.00  |
| 60  | POLYGONACEAE                | 0.00            | 0.00 | 0.00  | 0.00  | 0.00  |
| 61  | EPILABIUM                   | 0.00            | 0.00 | 0.00  | 0.00  | 0.00  |
| 62  | UICILLIFLORAE               | 0.00            | 0.00 | 0.00  | 0.00  | 0.00  |
| 63  | CHENOPODIACEAE              | 0.00            | 0.00 | 0.00  | 0.00  | 0.00  |
| 64  | CARYOPHYLLACEAE             | 0.00            | 0.00 | 0.00  | 0.00  | 0.00  |
| 65  | ERICACEAE                   | 0.00            | 0.00 | 0.00  | 0.00  | 0.00  |
| 66  | CUPRESSACEAE                | 0.00            | 0.00 | 0.00  | 0.00  | 0.00  |
| 67  | ROSACEAE UNDIFF.            | 0.00            | 0.00 | 0.00  | 0.00  | 0.00  |
| 68  | RHUS                        | 0.00            | 0.00 | 0.00  | 0.00  | 0.00  |
| 69  | MYRTICA-COMPTONIA           | 0.00            | 0.00 | 0.00  | 0.00  | 0.00  |
| 70  | IVA CF.                     | 0.00            | 0.00 | 0.00  | 0.00  | 0.00  |
| 71  | CYP-RACIA UNDIFF.           | 0.00            | 0.00 | 0.00  | 0.00  | 0.00  |
| 72  | CYP-RACIA A                 | 0.00            | 0.00 | 0.00  | 0.00  | 0.00  |
| 73  | CHENOPODIUM-TYPE            | 0.00            | 0.00 | 0.00  | 0.00  | 0.00  |
| 74  | CHENOPODIUM A               | 0.00            | 0.00 | 0.00  | 0.00  | 0.00  |
| 75  | CHENOPODIUM B               | 0.00            | 0.00 | 0.00  | 0.00  | 0.00  |
| 76  | CHENOPODIUM C               | 0.00            | 0.00 | 0.00  | 0.00  | 0.00  |
| 77  | GRAMINA UNDIFF.             | 0.00            | 0.00 | 0.00  | 0.00  | 0.00  |
| 78  | RUPPIA                      | 0.00            | 0.00 | 0.00  | 0.00  | 0.00  |
| 79  | UNKNOWN                     | 0.00            | 0.00 | 0.00  | 0.00  | 0.00  |
| 80  | UNKNOWN                     | 0.00            | 0.00 | 0.00  | 0.00  | 0.00  |
| 81  | UNKNOWN                     | 0.00            | 0.00 | 0.00  | 0.00  | 0.00  |

| NO. | TYPE                         | 54    | 62    |
|-----|------------------------------|-------|-------|
| 1   | PINUS HAPLOXYLON             | 6.12  | 3.53  |
| 2   | PINUS DIPLOXYLON             | 18.36 | 10.59 |
| 3   | TOTAL PINUS                  | 24.48 | 14.12 |
| 4   | ALNUS                        | 1.00  | 1.00  |
| 5   | ABUTILON                     | 1.00  | 1.00  |
| 6   | TSUGA                        | 1.00  | 1.00  |
| 7   | FAGUS                        | 1.00  | 1.00  |
| 8   | TILIA                        | 1.00  | 1.00  |
| 9   | ACER SACCHARUM               | 1.00  | 1.00  |
| 10  | QUERCUS                      | 1.00  | 1.00  |
| 11  | CASTANEA                     | 1.00  | 1.00  |
| 12  | CARYA                        | 1.00  | 1.00  |
| 13  | LIQUIDAMBAR                  | 1.00  | 1.00  |
| 14  | BETULA                       | 1.00  | 1.00  |
| 15  | JUGLANS UNDIFF.              | 1.00  | 1.00  |
| 16  | JUGLANS CINEREA              | 1.00  | 1.00  |
| 17  | JUGLANS NIGRA                | 1.00  | 1.00  |
| 18  | FRAXINUS PENNSYLVANICA-TYPE  | 1.00  | 1.00  |
| 19  | FRAXINUS NIGRA-TYPE          | 1.00  | 1.00  |
| 20  | ULMUS                        | 1.00  | 1.00  |
| 21  | OSTRYA /CARPINUS             | 1.00  | 1.00  |
| 22  | ACER RUBRUM                  | 1.00  | 1.00  |
| 23  | PLATANUS                     | 1.00  | 1.00  |
| 24  | GORYLUS                      | 1.00  | 1.00  |
| 25  | AMBROSIA-TYPE                | 1.00  | 1.00  |
| 26  | RUMEX                        | 1.00  | 1.00  |
| 27  | PLANTAGO LANCEOLATA          | 1.00  | 1.00  |
| 28  | PLANTAGO MAJOR               | 1.00  | 1.00  |
| 29  | REGIONAL SUM                 | 1.00  | 1.00  |
| 30  | RHAMNUS/VITIS                | 1.00  | 1.00  |
| 31  | THALICTRUM                   | 1.00  | 1.00  |
| 32  | IMPATIENS                    | 1.00  | 1.00  |
| 33  | URTICA                       | 1.00  | 1.00  |
| 34  | LABIATAE                     | 1.00  | 1.00  |
| 35  | LYCOPODIUM UNDIFF.           | 1.00  | 1.00  |
| 36  | LYCOPODIUM LUCIDULUM         | 1.00  | 1.00  |
| 37  | OSMUNDA UNDIFF.              | 1.00  | 1.00  |
| 38  | SPHAGNUM                     | 1.00  | 1.00  |
| 39  | PTERIDIUM                    | 1.00  | 1.00  |
| 40  | BOTRYCHIUM                   | 1.00  | 1.00  |
| 41  | POTAMOGETON                  | 1.00  | 1.00  |
| 42  | NUPHAR                       | 1.00  | 1.00  |
| 43  | NYMPHAEA                     | 1.00  | 1.00  |
| 44  | CEPHALANTHUS                 | 1.00  | 1.00  |
| 45  | NYSSA                        | 1.00  | 1.00  |
| 46  | SALIX                        | 1.00  | 1.00  |
| 47  | ALNUS CF.                    | 1.00  | 1.00  |
| 48  | ILEX                         | 1.00  | 1.00  |
| 49  | SPARGANIUM-TYPE              | 1.00  | 1.00  |
| 50  | TYPHA                        | 1.00  | 1.00  |
| 51  | MONOLETE SPORE               | 1.00  | 1.00  |
| 52  | ARTEMISIA                    | 1.00  | 1.00  |
| 53  | LIGULIFLORAE                 | 1.00  | 1.00  |
| 54  | TUBULIFLORAE UNDIFF.         | 1.00  | 1.00  |
| 55  | TUBULIFLORAE A               | 1.00  | 1.00  |
| 56  | TUBULIFLORAE B               | 1.00  | 1.00  |
| 57  | TUBULIFLORAE C               | 1.00  | 1.00  |
| 58  | LYCOPODIUM ANNOT INUM        | 1.00  | 1.00  |
| 59  | LYCOPODIUM TRISTATUM         | 1.00  | 1.00  |
| 60  | POLYGONUM LAPATHIFOLIUM-TYPE | 1.00  | 1.00  |
| 61  | POLYGONACEAE                 | 1.00  | 1.00  |
| 62  | EPILOBIUM                    | 1.00  | 1.00  |
| 63  | UMBELLIFERAE                 | 1.00  | 1.00  |
| 64  | CRUCIFERAE                   | 1.00  | 1.00  |
| 65  | CARYOPHYLLACEAE              | 1.00  | 1.00  |
| 66  | ERYCACEAE                    | 1.00  | 1.00  |
| 67  | RUBRACEAE                    | 1.00  | 1.00  |
| 68  | ROSACEAE UNDIFF.             | 1.00  | 1.00  |
| 69  | RHUS                         | 1.00  | 1.00  |
| 70  | MYRTICA-COMPTONIA            | 1.00  | 1.00  |
| 71  | IVA CF.                      | 1.00  | 1.00  |
| 72  | CYPERACEAE UNDIFF.           | 1.00  | 1.00  |
| 73  | CYPERACEAE A                 | 1.00  | 1.00  |
| 74  | CHENOPODIUM-TYPE             | 1.00  | 1.00  |
| 75  | CHENOPODIUM A                | 1.00  | 1.00  |
| 76  | CHENOPODIUM B                | 1.00  | 1.00  |
| 77  | CHENOPODIUM C                | 1.00  | 1.00  |
| 78  | GRAMINEAE UNDIFF.            | 1.00  | 1.00  |
| 79  | RUPPIA                       | 1.00  | 1.00  |
| 80  | INDETERMINATE/OBSCURE        | 1.00  | 1.00  |
| 81  | UNKNOWN                      | 1.00  | 1.00  |



| NO. | TYPE                         | DEPTH OF SAMPLE (CM) |       |       |       |       |       |
|-----|------------------------------|----------------------|-------|-------|-------|-------|-------|
|     |                              | 24                   | 33    | 125   | 132   | 163   | 204   |
| 1   | FINUS HAFLOXYLON             | 0.00                 | 6.70  | 28.68 | 18.77 | 16.57 | 0.00  |
| 2   | FINUS DIPLOXYLON             | 35.58                | 6.70  | 0.00  | 15.77 | 0.00  | 30.97 |
| 3   | TOTAL PINUS                  | 35.58                | 13.40 | 28.68 | 31.53 | 16.57 | 30.97 |
| 4   | PICEA                        | 0.00                 | 0.00  | 1.00  | 2.27  | 0.84  | 0.26  |
| 5   | ABIES                        | 0.00                 | 0.00  | 0.00  | 0.00  | 0.00  | 0.00  |
| 6   | TSUGA                        | 1.84                 | 1.83  | 3.99  | 5.97  | 5.86  | 5.25  |
| 7   | FAGUS                        | 0.00                 | 0.00  | 0.00  | 0.00  | 0.00  | 1.05  |
| 8   | TILIA                        | 0.00                 | 0.00  | 0.00  | 0.00  | 0.00  | 0.00  |
| 9   | ACER SACCHARUM               | 1.84                 | 0.00  | 1.70  | 1.70  | 0.56  | 0.82  |
| 10  | QUERCUS                      | 35.58                | 28.68 | 37.41 | 37.50 | 4.07  | 31.07 |
| 11  | CASTANEA                     | 0.00                 | 0.15  | 1.00  | 1.14  | 0.00  | 0.00  |
| 12  | CARYA                        | 1.23                 | 0.00  | 3.99  | 1.99  | 0.00  | 1.15  |
| 13  | LIQUIDAMBAR                  | 0.00                 | 0.00  | 0.50  | 0.00  | 0.00  | 0.00  |
| 14  | BETULA                       | 0.00                 | 0.00  | 0.00  | 0.00  | 0.00  | 0.00  |
| 15  | JUGLANS UNDIFF.              | 0.00                 | 0.00  | 0.00  | 0.00  | 0.00  | 0.00  |
| 16  | JUGLANS CINEREA              | 0.00                 | 0.00  | 0.00  | 0.00  | 0.00  | 0.00  |
| 17  | JUGLANS NIGRA                | 0.00                 | 0.00  | 0.00  | 0.00  | 0.00  | 0.00  |
| 18  | FRAXINUS PENNSYLVANICA-TYPE  | 0.00                 | 0.00  | 1.50  | 0.28  | 0.00  | 0.00  |
| 19  | FRAXINUS NIGRA-TYPE          | 1.23                 | 0.00  | 0.00  | 0.00  | 0.00  | 0.00  |
| 20  | ULMUS                        | 0.00                 | 0.00  | 0.50  | 0.85  | 0.00  | 0.00  |
| 21  | OSTRYA/CARPINUS              | 0.00                 | 1.03  | 1.50  | 0.28  | 1.12  | 0.00  |
| 22  | ACER RUBRUM                  | 0.00                 | 0.00  | 1.00  | 0.28  | 0.00  | 0.00  |
| 23  | PLATANUS                     | 0.00                 | 0.00  | 0.00  | 0.00  | 0.00  | 0.00  |
| 24  | CORYLUS                      | 0.00                 | 0.00  | 0.00  | 0.00  | 1.12  | 0.00  |
| 25  | AMBROSIA-TYPE                | 17.79                | 34.02 | 9.48  | 8.81  | 11.24 | 13.12 |
| 26  | RUMEX                        | 0.00                 | 7.22  | 2.99  | 3.41  | 0.56  | 1.57  |
| 27  | PLANTAGO LANCEOLATA          | 0.00                 | 1.03  | 0.50  | 0.28  | 0.00  | 0.00  |
| 28  | PLANTAGO MAJOR               | 0.00                 | 0.00  | 0.00  | 0.00  | 0.00  | 0.00  |
| 29  | REGIONAL SUN                 | 18.00                | 18.00 | 18.00 | 18.00 | 18.00 | 18.00 |
| 30  | PHAMNUS/VITIS                | 0.00                 | 0.00  | 0.00  | 0.00  | 0.00  | 0.00  |
| 31  | THALICTRUM                   | 0.00                 | 0.00  | 0.00  | 0.00  | 0.00  | 0.00  |
| 32  | IMPATIENS                    | 0.00                 | 0.00  | 0.00  | 0.00  | 0.00  | 0.00  |
| 33  | URTICA                       | 0.00                 | 0.00  | 0.00  | 0.00  | 0.00  | 0.00  |
| 34  | LABIATAE                     | 1.61                 | 0.00  | 0.00  | 0.00  | 0.00  | 0.00  |
| 35  | LYCOPodium UNDIFF.           | 1.23                 | 1.03  | 0.00  | 0.00  | 0.00  | 0.00  |
| 36  | LYCOPodium LUCIDULUM         | 0.00                 | 0.00  | 0.00  | 0.57  | 0.00  | 0.00  |
| 37  | CSMUNDA UNDIFF.              | 3.07                 | 0.00  | 0.00  | 0.00  | 0.56  | 1.05  |
| 38  | SPHAGNUM                     | 1.23                 | 0.00  | 0.50  | 0.28  | 3.37  | 0.52  |
| 39  | PTERIDIUM                    | 6.13                 | 0.00  | 0.50  | 1.99  | 0.00  | 1.57  |
| 40  | POTRYCHUM                    | 0.00                 | 0.00  | 0.00  | 0.00  | 0.00  | 0.00  |
| 41  | POTAMOGETON                  | 0.61                 | 0.00  | 0.00  | 0.00  | 0.00  | 0.00  |
| 42  | MUPHAR                       | 0.00                 | 0.00  | 0.00  | 0.00  | 0.00  | 0.00  |
| 43  | NYMPHAEA                     | 0.00                 | 0.00  | 0.00  | 0.00  | 0.00  | 0.00  |
| 44  | C-PHALANTHUS                 | 0.00                 | 0.00  | 0.00  | 0.00  | 0.00  | 0.00  |
| 45  | NYSSA                        | 0.00                 | 0.00  | 0.00  | 0.00  | 0.00  | 0.00  |
| 46  | SALIX                        | 0.61                 | 0.00  | 0.50  | 0.00  | 0.00  | 0.00  |
| 47  | ALNUS CF.                    | 0.61                 | 0.03  | 1.50  | 1.42  | 1.69  | 1.57  |
| 48  | ILEX                         | 0.00                 | 0.00  | 0.00  | 0.00  | 0.00  | 0.00  |
| 49  | SPARGANIUM-TYPE              | 15.95                | 12.34 | 0.00  | 0.00  | 0.00  | 0.00  |
| 50  | LYPLA                        | 0.00                 | 0.00  | 0.50  | 0.00  | 0.00  | 0.00  |
| 51  | CONCLETE SPORE               | 0.00                 | 0.00  | 0.00  | 0.00  | 0.00  | 0.00  |
| 52  | ARTEMISIA                    | 0.00                 | 0.00  | 0.00  | 0.00  | 0.00  | 0.00  |
| 53  | LIGULIFLORAE                 | 0.00                 | 0.00  | 0.00  | 0.00  | 0.00  | 0.00  |
| 54  | TUBULIFLORAE UNDIFF.         | 0.00                 | 0.00  | 0.00  | 0.00  | 0.00  | 0.00  |
| 55  | TUBULIFLORAE A               | 0.00                 | 0.00  | 0.00  | 0.00  | 0.00  | 0.00  |
| 56  | TUBULIFLORAE B               | 0.00                 | 0.00  | 0.00  | 0.00  | 0.00  | 0.00  |
| 57  | TUBULIFLORAE C               | 0.00                 | 0.00  | 0.00  | 0.00  | 0.00  | 0.00  |
| 58  | LYCOPodium ANNOTINUM         | 0.00                 | 0.00  | 0.00  | 0.00  | 0.00  | 0.00  |
| 59  | LYCOPodium TRISTACHYUM       | 0.00                 | 0.00  | 0.00  | 0.00  | 0.00  | 0.00  |
| 60  | LYCOPodium INUNDATUM         | 0.00                 | 0.00  | 0.00  | 0.00  | 0.00  | 0.00  |
| 61  | POLYGONUM LAPATHIFOLIUM-TYPE | 0.00                 | 0.00  | 0.00  | 0.00  | 0.00  | 0.00  |
| 62  | POLYGONACEAE                 | 0.00                 | 0.00  | 0.00  | 0.00  | 0.00  | 0.00  |
| 63  | POILORIUM                    | 0.00                 | 0.00  | 0.00  | 0.00  | 0.00  | 0.00  |
| 64  | UPELLETEREAE                 | 0.00                 | 0.00  | 0.00  | 0.00  | 0.00  | 0.00  |
| 65  | CRUCIFERAE                   | 0.00                 | 0.00  | 0.00  | 0.00  | 0.00  | 0.00  |
| 66  | CARYOPHYLLACEAE              | 0.00                 | 0.00  | 0.00  | 0.00  | 0.00  | 0.00  |
| 67  | ERICACEAE                    | 0.00                 | 0.00  | 0.00  | 0.00  | 0.00  | 0.00  |
| 68  | CURRESSACEAE                 | 0.00                 | 0.00  | 0.00  | 0.00  | 0.00  | 0.00  |
| 69  | ROSACEAE UNDIFF.             | 0.61                 | 0.00  | 0.00  | 0.00  | 0.00  | 1.05  |
| 70  | RHUS                         | 0.61                 | 0.00  | 0.00  | 0.00  | 0.00  | 0.00  |
| 71  | MYRICA-COMPTONIA             | 0.00                 | 0.00  | 0.00  | 0.00  | 0.00  | 0.00  |
| 72  | IVA CF.                      | 0.00                 | 0.00  | 0.00  | 0.00  | 0.00  | 0.00  |
| 73  | CYPERACEAE UNDIFF.           | 0.00                 | 0.00  | 0.00  | 0.00  | 0.00  | 0.00  |
| 74  | CYPERACEAE A                 | 0.00                 | 0.00  | 0.00  | 0.00  | 0.00  | 0.00  |
| 75  | CHENOPodium-TYPE             | 0.00                 | 0.00  | 0.00  | 0.00  | 0.00  | 0.00  |
| 76  | CHENOPodium A                | 0.00                 | 0.00  | 0.00  | 0.00  | 0.00  | 0.00  |
| 77  | CHENOPodium B                | 0.00                 | 0.00  | 0.00  | 0.00  | 0.00  | 0.00  |
| 78  | CHENOPodium C                | 0.00                 | 0.00  | 0.00  | 0.00  | 0.00  | 0.00  |
| 79  | GRANINAE UNDIFF.             | 0.00                 | 0.00  | 0.00  | 0.00  | 0.00  | 0.00  |
| 80  | RUPPIA                       | 0.00                 | 0.00  | 0.00  | 0.00  | 0.00  | 0.00  |
| 81  | INDETERMINATE/OBSCURE        | 0.00                 | 0.00  | 0.00  | 0.00  | 0.00  | 0.00  |
| 82  | UNKNOWN                      | 0.00                 | 0.00  | 0.00  | 0.00  | 0.00  | 0.00  |

|      |                             | DEATH OF SANGLI (M) |        |        |        |        |        |        |        |  |
|------|-----------------------------|---------------------|--------|--------|--------|--------|--------|--------|--------|--|
| TYPE |                             | 86                  | 92     | 96     | 102    | 109    | 115    | 121    | 125    |  |
| 1    | PINUS HAPLOXYLON            | 13.74               | 22.77  | 14.38  | 40.00  | 50.00  | 64.77  | 10.49  | 10.07  |  |
| 2    | PINUS DIPLOYXILON           | 7.94                | 6.83   | 11.37  | 0.00   | 0.00   | 0.00   | 17.62  | 17.62  |  |
| 3    | TOTAL PINUS                 | 21.68               | 29.60  | 25.75  | 40.00  | 50.00  | 64.77  | 28.11  | 27.69  |  |
| 4    | PICEA                       | 1.18                | 0.47   | 1.01   | 0.00   | 1.22   | 0.00   | 0.00   | 0.00   |  |
| 5    | ABIES                       | 0.00                | 0.00   | 0.00   | 0.00   | 0.00   | 0.00   | 0.00   | 0.00   |  |
| 6    | TSUGA                       | 11.76               | 6.30   | 6.89   | 0.00   | 3.66   | 11.36  | 7.60   | 4.99   |  |
| 7    | PECEGIA                     | 1.57                | 0.00   | 0.00   | 0.00   | 0.00   | 0.00   | 0.00   | 0.00   |  |
| 8    | TILIA                       | 0.00                | 0.00   | 0.00   | 0.00   | 0.00   | 0.00   | 0.00   | 0.00   |  |
| 9    | ACEF SACCHARUM              | 2.45                | 1.57   | 0.41   | 0.00   | 4.00   | 2.27   | 2.00   | 0.00   |  |
| 10   | QUERCUS                     | 32.16               | 37.00  | 43.81  | 27.69  | 26.83  | 13.54  | 41.26  | 43.63  |  |
| 11   | CASTANEA                    | 3.42                | 3.42   | 4.87   | 7.77   | 3.66   | 1.14   | 2.80   | 1.54   |  |
| 12   | CORYA                       | 0.00                | 0.00   | 0.00   | 0.00   | 0.00   | 0.00   | 0.00   | 0.00   |  |
| 13   | LICUIGAMHAR                 | 0.00                | 0.00   | 0.00   | 0.00   | 0.00   | 0.00   | 0.00   | 0.00   |  |
| 14   | BIFULA                      | 0.00                | 12.00  | 7.71   | 10.00  | 0.00   | 0.00   | 0.00   | 0.00   |  |
| 15   | JUGLANS UNDIFF.             | 0.00                | 0.00   | 0.00   | 0.00   | 0.00   | 0.00   | 0.00   | 0.00   |  |
| 16   | JUGLANS CINREA              | 0.00                | 0.00   | 0.00   | 0.00   | 0.00   | 0.00   | 0.00   | 0.00   |  |
| 17   | JUGLANS NIGRA               | 0.00                | 0.00   | 0.00   | 0.00   | 0.00   | 0.00   | 0.00   | 0.00   |  |
| 18   | FALXINUS PENNSYLVANICA-TYPE | 0.00                | 0.00   | 0.00   | 0.00   | 0.00   | 0.00   | 0.00   | 0.00   |  |
| 19   | FALXINUS NIGRA-TYPE         | 0.00                | 0.00   | 0.00   | 0.00   | 0.00   | 0.00   | 0.00   | 0.00   |  |
| 20   | ULMUS                       | 1.57                | 0.41   | 1.61   | 0.00   | 0.00   | 0.00   | 0.00   | 1.47   |  |
| 21   | OSTRYA/CARPINUS             | 0.00                | 0.00   | 0.00   | 0.00   | 0.00   | 0.00   | 0.00   | 0.00   |  |
| 22   | ACEF RUBRUM                 | 2.15                | 1.22   | 1.22   | 1.22   | 0.00   | 3.41   | 0.00   | 0.00   |  |
| 23   | PLATANUS                    | 0.00                | 0.00   | 0.00   | 0.00   | 0.00   | 0.00   | 0.00   | 0.00   |  |
| 24   | CORYLUS                     | 0.00                | 0.00   | 0.00   | 0.00   | 0.00   | 0.00   | 0.00   | 0.00   |  |
| 25   | AMEPOSIA-TYPE               | 7.64                | 0.41   | 3.25   | 1.54   | 0.00   | 1.14   | 0.00   | 0.49   |  |
| 26   | RUFEX                       | 0.00                | 0.00   | 0.00   | 0.00   | 0.00   | 0.00   | 0.00   | 0.00   |  |
| 27   | PLANTAGO LANCEOLATA         | 0.00                | 0.00   | 0.00   | 0.00   | 0.00   | 0.00   | 0.00   | 0.00   |  |
| 28   | PLANTAGO MAJOR              | 0.00                | 0.00   | 0.00   | 0.00   | 0.00   | 0.00   | 0.00   | 0.00   |  |
| 29   | REGIONAL SUM                | 100.00              | 100.00 | 100.00 | 100.00 | 100.00 | 100.00 | 100.00 | 100.00 |  |
| 30   | RACIUS/VITIS                | 0.00                | 0.00   | 0.00   | 0.00   | 0.00   | 0.00   | 0.00   | 0.00   |  |
| 31   | TRALICTUM                   | 0.00                | 0.00   | 0.00   | 0.00   | 0.00   | 0.00   | 0.00   | 0.00   |  |
| 32   | IMPATIENS                   | 0.00                | 0.00   | 0.00   | 0.00   | 0.00   | 0.00   | 0.00   | 0.00   |  |
| 33   | UTICA                       | 0.00                | 0.00   | 0.00   | 0.00   | 0.00   | 0.00   | 0.00   | 0.00   |  |
| 34   | LYCOPOLIUM UNDIFF.          | 0.00                | 0.00   | 0.00   | 0.00   | 0.00   | 0.00   | 0.00   | 0.00   |  |
| 35   | LYCOPOLIUM LUCIDOLUM        | 0.00                | 0.00   | 0.00   | 0.00   | 0.00   | 0.00   | 0.00   | 0.00   |  |
| 36   | OSMUNDA UNDIFF.             | 1.57                | 0.00   | 0.81   | 0.00   | 0.00   | 0.00   | 0.00   | 0.00   |  |
| 37   | SPHAGNUM                    | 0.00                | 0.00   | 0.00   | 0.00   | 0.00   | 0.00   | 0.00   | 0.00   |  |
| 38   | PICEADILUM                  | 0.00                | 0.00   | 0.00   | 0.00   | 0.00   | 0.00   | 0.00   | 0.00   |  |
| 39   | EUSTACHIUM                  | 0.00                | 0.00   | 0.00   | 0.00   | 0.00   | 0.00   | 0.00   | 0.00   |  |
| 40   | POLANOCTON                  | 0.00                | 0.00   | 0.00   | 0.00   | 0.00   | 0.00   | 0.00   | 0.00   |  |
| 41   | NYSSE                       | 0.00                | 0.00   | 0.00   | 0.00   | 0.00   | 0.00   | 0.00   | 0.00   |  |
| 42   | NYSSA                       | 0.00                | 0.00   | 0.00   | 0.00   | 0.00   | 0.00   | 0.00   | 0.00   |  |
| 43   | SERNALATINUS                | 0.00                | 0.00   | 0.00   | 0.00   | 0.00   | 0.00   | 0.00   | 0.00   |  |
| 44   | NYSSE                       | 0.00                | 0.00   | 0.00   | 0.00   | 0.00   | 0.00   | 0.00   | 0.00   |  |
| 45   | SALIX                       | 0.00                | 0.00   | 0.00   | 0.00   | 0.00   | 0.00   | 0.00   | 0.00   |  |
| 46   | ALNUS CF.                   | 0.00                | 0.00   | 0.00   | 0.00   | 0.00   | 0.00   | 0.00   | 0.00   |  |
| 47   | ILTY                        | 0.00                | 0.00   | 0.00   | 0.00   | 0.00   | 0.00   | 0.00   | 0.00   |  |
| 48   | SEAFEGANIUM-TYPE            | 0.00                | 0.00   | 0.00   | 0.00   | 0.00   | 0.00   | 0.00   | 0.00   |  |
| 49   | TYPHA                       | 0.00                | 0.00   | 0.00   | 0.00   | 0.00   | 0.00   | 0.00   | 0.00   |  |
| 50   | MULCETIA SECAF              | 0.00                | 0.00   | 0.00   | 0.00   | 0.00   | 0.00   | 0.00   | 0.00   |  |
| 51   | ATENSISIA                   | 0.00                | 0.00   | 0.00   | 0.00   | 0.00   | 0.00   | 0.00   | 0.00   |  |
| 52   | LIGULIFLOAF                 | 0.00                | 0.00   | 0.00   | 0.00   | 0.00   | 0.00   | 0.00   | 0.00   |  |
| 53   | TURULIFLOAF UNDIFF.         | 10.20               | 4.41   | 5.27   | 18.62  | 13.41  | 4.00   | 1.00   | 1.00   |  |
| 54   | TURULIFLOAF                 | 0.00                | 0.00   | 0.00   | 0.00   | 0.00   | 0.00   | 0.00   | 0.00   |  |
| 55   | TURULIFLOAF                 | 0.00                | 0.00   | 0.00   | 0.00   | 0.00   | 0.00   | 0.00   | 0.00   |  |
| 56   | TURULIFLOAF                 | 0.00                | 0.00   | 0.00   | 0.00   | 0.00   | 0.00   | 0.00   | 0.00   |  |
| 57   | LYCOPOLIUM UNDIFF.          | 0.00                | 0.00   | 0.00   | 0.00   | 0.00   | 0.00   | 0.00   | 0.00   |  |
| 58   | LYCOPOLIUM UNDIFF.          | 0.00                | 0.00   | 0.00   | 0.00   | 0.00   | 0.00   | 0.00   | 0.00   |  |
| 59   | LYCOPOLIUM UNDIFF.          | 0.00                | 0.00   | 0.00   | 0.00   | 0.00   | 0.00   | 0.00   | 0.00   |  |
| 60   | LYCOPOLIUM UNDIFF.          | 0.00                | 0.00   | 0.00   | 0.00   | 0.00   | 0.00   | 0.00   | 0.00   |  |
| 61   | LYCOPOLIUM UNDIFF.          | 0.00                | 0.00   | 0.00   | 0.00   | 0.00   | 0.00   | 0.00   | 0.00   |  |
| 62   | LYCOPOLIUM UNDIFF.          | 0.00                | 0.00   | 0.00   | 0.00   | 0.00   | 0.00   | 0.00   | 0.00   |  |
| 63   | LYCOPOLIUM UNDIFF.          | 0.00                | 0.00   | 0.00   | 0.00   | 0.00   | 0.00   | 0.00   | 0.00   |  |
| 64   | LYCOPOLIUM UNDIFF.          | 0.00                | 0.00   | 0.00   | 0.00   | 0.00   | 0.00   | 0.00   | 0.00   |  |
| 65   | LYCOPOLIUM UNDIFF.          | 0.00                | 0.00   | 0.00   | 0.00   | 0.00   | 0.00   | 0.00   | 0.00   |  |
| 66   | LYCOPOLIUM UNDIFF.          | 0.00                | 0.00   | 0.00   | 0.00   | 0.00   | 0.00   | 0.00   | 0.00   |  |
| 67   | LYCOPOLIUM UNDIFF.          | 0.00                | 0.00   | 0.00   | 0.00   | 0.00   | 0.00   | 0.00   | 0.00   |  |
| 68   | LYCOPOLIUM UNDIFF.          | 0.00                | 0.00   | 0.00   | 0.00   | 0.00   | 0.00   | 0.00   | 0.00   |  |
| 69   | LYCOPOLIUM UNDIFF.          | 0.00                | 0.00   | 0.00   | 0.00   | 0.00   | 0.00   | 0.00   | 0.00   |  |
| 70   | LYCOPOLIUM UNDIFF.          | 0.00                | 0.00   | 0.00   | 0.00   | 0.00   | 0.00   | 0.00   | 0.00   |  |
| 71   | LYCOPOLIUM UNDIFF.          | 0.00                | 0.00   | 0.00   | 0.00   | 0.00   | 0.00   | 0.00   | 0.00   |  |
| 72   | LYCOPOLIUM UNDIFF.          | 0.00                | 0.00   | 0.00   | 0.00   | 0.00   | 0.00   | 0.00   | 0.00   |  |
| 73   | LYCOPOLIUM UNDIFF.          | 0.00                | 0.00   | 0.00   | 0.00   | 0.00   | 0.00   | 0.00   | 0.00   |  |
| 74   | LYCOPOLIUM UNDIFF.          | 0.00                | 0.00   | 0.00   | 0.00   | 0.00   | 0.00   | 0.00   | 0.00   |  |
| 75   | LYCOPOLIUM UNDIFF.          | 0.00                | 0.00   | 0.00   | 0.00   | 0.00   | 0.00   | 0.00   | 0.00   |  |
| 76   | LYCOPOLIUM UNDIFF.          | 0.00                | 0.00   | 0.00   | 0.00   | 0.00   | 0.00   | 0.00   | 0.00   |  |
| 77   | LYCOPOLIUM UNDIFF.          | 0.00                | 0.00   | 0.00   | 0.00   | 0.00   | 0.00   | 0.00   | 0.00   |  |
| 78   | LYCOPOLIUM UNDIFF.          | 0.00                | 0.00   | 0.00   | 0.00   | 0.00   | 0.00   | 0.00   | 0.00   |  |
| 79   | LYCOPOLIUM UNDIFF.          | 0.00                | 0.00   | 0.00   | 0.00   | 0.00   | 0.00   | 0.00   | 0.00   |  |
| 80   | LYCOPOLIUM UNDIFF.          | 0.00                | 0.00   | 0.00   | 0.00   | 0.00   | 0.00   | 0.00   | 0.00   |  |
| 81   | LYCOPOLIUM UNDIFF.          | 0.00                | 0.00   | 0.00   | 0.00   | 0.00   | 0.00   | 0.00   | 0.00   |  |
| 82   | LYCOPOLIUM UNDIFF.          | 0.00                | 0.00   | 0.00   | 0.00   | 0.00   | 0.00   | 0.00   | 0.00   |  |
| 83   | LYCOPOLIUM UNDIFF.          | 0.00                | 0.00   | 0.00   | 0.00   | 0.00   | 0.00   | 0.00   | 0.00   |  |
| 84   | LYCOPOLIUM UNDIFF.          | 0.00                | 0.00   | 0.00   | 0.00   | 0.00   | 0.00   | 0.00   | 0.00   |  |
| 85   | LYCOPOLIUM UNDIFF.          | 0.00                | 0.00   | 0.00   | 0.00   | 0.00   | 0.00   | 0.00   | 0.00   |  |
| 86   | LYCOPOLIUM UNDIFF.          | 0.00                | 0.00   | 0.00   | 0.00   | 0.00   | 0.00   | 0.00   | 0.00   |  |
| 87   | LYCOPOLIUM UNDIFF.          | 0.00                | 0.00   | 0.00   | 0.00   | 0.00   | 0.00   | 0.00   | 0.00   |  |
| 88   | LYCOPOLIUM UNDIFF.          | 0.00                | 0.00   | 0.00   | 0.00   | 0.00   | 0.00   | 0.00   | 0.00   |  |
| 89   | LYCOPOLIUM UNDIFF.          | 0.00                | 0.00   | 0.00   | 0.00   | 0.00   | 0.00   | 0.00   | 0.00   |  |
| 90   | LYCOPOLIUM UNDIFF.          | 0.00                | 0.00   | 0.00   | 0.00   | 0.00   | 0.00   | 0.00   | 0.00   |  |
| 91   | LYCOPOLIUM UNDIFF.          | 0.00                | 0.00   | 0.00   | 0.00   | 0.00   | 0.00   | 0.00   | 0.00   |  |
| 92   | LYCOPOLIUM UNDIFF.          | 0.00                | 0.00   | 0.00   | 0.00   | 0.00   | 0.00   | 0.00   | 0.00   |  |
| 93   | LYCOPOLIUM UNDIFF.          | 0.00                | 0.00   | 0.00   | 0.00   | 0.00   | 0.00   | 0.00   | 0.00   |  |
| 94   | LYCOPOLIUM UNDIFF.          | 0.00                | 0.00   | 0.00   | 0.00   | 0.00   | 0.00   | 0.00   | 0.00   |  |
| 95   | LYCOPOLIUM UNDIFF.          | 0.00                | 0.00   | 0.00   | 0.00   | 0.00   | 0.00   | 0.00   | 0.00   |  |
| 96   | LYCOPOLIUM UNDIFF.          | 0.00                | 0.00   | 0.00   | 0.00   | 0.00   | 0.00   | 0.00   | 0.00   |  |
| 97   | LYCOPOLIUM UNDIFF.          | 0.00                | 0.00   | 0.00   | 0.00   | 0.00   | 0.00   | 0.00   | 0.00   |  |
| 98   | LYCOPOLIUM UNDIFF.          | 0.00                | 0.00   | 0.00   | 0.00   | 0.00   | 0.00   | 0.00   | 0.00   |  |
| 99   | LYCOPOLIUM UNDIFF.          | 0.00                | 0.00   | 0.00   | 0.00   | 0.00   | 0.00   | 0.00   | 0.00   |  |
| 100  | LYCOPOLIUM UNDIFF.          | 0.00                | 0.00   | 0.00   | 0.00   | 0.00   | 0.00   | 0.00   | 0.00   |  |

## EAST LONG COVE CORE 3

| NO. | TYPE                        | 16    | 25    | 142   | 143   | 151   |
|-----|-----------------------------|-------|-------|-------|-------|-------|
| 1   | PINUS HAPLOXYLON            | 6.88  | 14.81 | 6.45  | 6.10  | 14.26 |
| 2   | PINUS DIPLOXYLON            | 3.04  | 13.78 | 0.00  | 12.30 | 19.81 |
| 3   | TOTAL PINUS                 | 9.92  | 28.59 | 6.45  | 18.40 | 34.07 |
| 4   | PICEA                       | 1.14  | 4.63  | 1.61  | 0.61  | 2.37  |
| 5   | ABIES                       | 0.00  | 0.00  | 0.00  | 0.00  | 0.00  |
| 6   | TSUGA                       | 0.00  | 7.41  | 10.67 | 13.41 | 11.33 |
| 7   | FAGUS                       | 0.76  | 0.93  | 10.22 | 7.93  | 5.76  |
| 8   | TILIA                       | 0.00  | 0.00  | 0.00  | 0.00  | 0.00  |
| 9   | ACER SACCHARUM              | 0.00  | 0.00  | 0.00  | 0.00  | 0.00  |
| 10  | QUERCUS                     | 27.38 | 29.80 | 29.27 | 19.51 | 28.81 |
| 11  | CASTANEA                    | 4.56  | 6.48  | 2.69  | 1.22  | 3.34  |
| 12  | CARYA                       | 0.00  | 2.78  | 1.08  | 1.03  | 2.37  |
| 13  | LIQUIDAMBAR                 | 0.00  | 0.00  | 0.00  | 0.00  | 0.00  |
| 14  | BETULA                      | 6.68  | 5.58  | 6.99  | 14.02 | 5.76  |
| 15  | JUGLANS UNDIFF.             | 0.00  | 0.00  | 0.00  | 0.00  | 0.00  |
| 16  | JUGLANS CIN-REA             | 0.00  | 0.00  | 0.00  | 0.00  | 0.00  |
| 17  | JUGLANS NIGRA               | 0.00  | 1.89  | 0.00  | 0.00  | 0.00  |
| 18  | FRAXINUS PENNSYLVANICA-TYPE | 0.00  | 0.00  | 1.61  | 0.00  | 1.34  |
| 19  | FRAXINUS NIGRA-TYPE         | 1.32  | 0.00  | 1.08  | 0.00  | 1.34  |
| 20  | ULMUS                       | 2.28  | 0.00  | 1.76  | 1.22  | 1.34  |
| 21  | OSTEA/CARPINUS              | 0.00  | 0.00  | 0.00  | 0.00  | 0.00  |
| 22  | ACE RUBRUM                  | 2.28  | 0.00  | 1.61  | 0.61  | 0.34  |
| 23  | PLATANUS                    | 0.00  | 0.00  | 0.00  | 0.00  | 0.00  |
| 24  | CORYLUS                     | 0.00  | 0.00  | 0.00  | 0.00  | 0.00  |
| 25  | AMEROSIA-TYPE               | 35.54 | 2.00  | 0.00  | 12.00 | 1.00  |
| 26  | RUBUS                       | 4.56  | 0.00  | 0.00  | 0.00  | 0.00  |
| 27  | PLANTAGO LANCEOLATA         | 0.00  | 0.00  | 0.00  | 0.00  | 0.00  |
| 28  | PLANTAGO MAJOR              | 0.00  | 0.00  | 0.00  | 0.00  | 0.00  |
| 29  | REGIONAL SUM                | 10.00 | 10.00 | 10.00 | 10.00 | 10.00 |
| 30  | RHAMNUS/VITIS               | 0.00  | 0.00  | 0.00  | 0.00  | 0.00  |
| 31  | THALICTRUM                  | 0.00  | 0.00  | 0.00  | 0.61  | 0.34  |
| 32  | IPATIENS                    | 0.00  | 0.00  | 0.00  | 0.00  | 0.00  |
| 33  | URTICA                      | 0.00  | 0.00  | 0.00  | 0.00  | 0.00  |
| 34  | LARIATAE                    | 0.00  | 0.00  | 0.00  | 0.00  | 0.00  |
| 35  | LYCOPODIUM UNDIFF.          | 0.00  | 0.00  | 0.00  | 0.00  | 0.00  |
| 36  | LYCOPODIUM LUCIDULUM        | 0.00  | 0.00  | 0.00  | 0.00  | 0.00  |
| 37  | OSMUNDA UNDIFF.             | 0.00  | 0.00  | 0.00  | 0.00  | 0.00  |
| 38  | SPHAGNUM                    | 2.28  | 0.00  | 1.54  | 0.00  | 0.00  |
| 39  | PTERIDIUM                   | 0.00  | 0.00  | 0.00  | 0.00  | 0.00  |
| 40  | BUTRYCHIUM                  | 0.00  | 0.00  | 1.08  | 0.00  | 0.00  |
| 41  | POTAMOGETON                 | 0.00  | 0.00  | 0.00  | 0.61  | 0.00  |
| 42  | NUPHAR                      | 0.00  | 0.00  | 0.00  | 0.00  | 0.00  |
| 43  | NYMPHAEA                    | 0.00  | 0.00  | 0.00  | 0.00  | 0.00  |
| 44  | CYPALANTHUS                 | 0.00  | 0.00  | 0.00  | 0.00  | 0.00  |
| 45  | MYSSA                       | 0.00  | 0.00  | 0.00  | 0.61  | 0.00  |
| 46  | SALIX                       | 0.76  | 0.00  | 1.08  | 0.00  | 0.00  |
| 47  | ALNUS CF.                   | 0.76  | 2.78  | 1.08  | 5.49  | 0.00  |
| 48  | SPARGANIUM-TYPE             | 0.00  | 0.00  | 0.00  | 0.00  | 0.00  |
| 49  | TYPHA                       | 7.60  | 2.78  | 0.00  | 0.00  | 0.00  |
| 50  | MONOLITE SPOR.              | 0.00  | 0.00  | 0.00  | 0.00  | 0.00  |
| 51  | ARTEMISIA                   | 0.00  | 0.00  | 0.00  | 1.22  | 1.34  |
| 52  | LIGULIFLORAE                | 0.00  | 0.00  | 0.00  | 0.00  | 0.00  |
| 53  | TUBULIFLORAE UNDIFF.        | 19.61 | 1.19  | 0.00  | 0.00  | 4.07  |
| 54  | TUBULIFLORAE L              | 5.32  | 13.84 | 1.00  | 0.00  | 18.64 |
| 55  | TUBULIFLORAE C              | 0.00  | 0.00  | 0.00  | 0.00  | 0.00  |
| 56  | TUBULIFLORAE C              | 0.00  | 0.00  | 0.00  | 0.00  | 0.00  |
| 57  | LYCOPODIUM ANNOTINUM        | 0.00  | 0.00  | 0.00  | 0.00  | 0.00  |
| 58  | LYCOPODIUM TRISTACHYUM      | 0.00  | 0.00  | 0.00  | 0.00  | 0.00  |
| 59  | LYCOPODIUM INUVATIUM        | 0.00  | 0.00  | 0.00  | 0.00  | 0.00  |
| 60  | POLYPODIUM-LAPIDACEUM-TYPE  | 0.00  | 0.00  | 0.00  | 0.00  | 0.00  |
| 61  | POLYPODIUM                  | 0.00  | 0.00  | 0.00  | 0.00  | 0.00  |
| 62  | UROSALPINX                  | 0.00  | 0.00  | 0.00  | 0.00  | 0.00  |
| 63  | UROSALPINX                  | 0.00  | 0.00  | 0.00  | 0.00  | 0.00  |
| 64  | UROSALPINX                  | 0.00  | 0.00  | 0.00  | 0.00  | 0.00  |
| 65  | UROSALPINX                  | 0.00  | 0.00  | 0.00  | 0.00  | 0.00  |
| 66  | UROSALPINX                  | 0.00  | 0.00  | 0.00  | 0.00  | 0.00  |
| 67  | UROSALPINX                  | 0.00  | 0.00  | 0.00  | 0.00  | 0.00  |
| 68  | UROSALPINX                  | 0.00  | 0.00  | 0.00  | 0.00  | 0.00  |
| 69  | UROSALPINX                  | 0.00  | 0.00  | 0.00  | 0.00  | 0.00  |
| 70  | UROSALPINX                  | 0.00  | 0.00  | 0.00  | 0.00  | 0.00  |
| 71  | UROSALPINX                  | 0.00  | 0.00  | 0.00  | 0.00  | 0.00  |
| 72  | UROSALPINX                  | 0.00  | 0.00  | 0.00  | 0.00  | 0.00  |
| 73  | UROSALPINX                  | 0.00  | 0.00  | 0.00  | 0.00  | 0.00  |
| 74  | UROSALPINX                  | 0.00  | 0.00  | 0.00  | 0.00  | 0.00  |
| 75  | UROSALPINX                  | 0.00  | 0.00  | 0.00  | 0.00  | 0.00  |
| 76  | UROSALPINX                  | 0.00  | 0.00  | 0.00  | 0.00  | 0.00  |
| 77  | UROSALPINX                  | 0.00  | 0.00  | 0.00  | 0.00  | 0.00  |
| 78  | UROSALPINX                  | 0.00  | 0.00  | 0.00  | 0.00  | 0.00  |
| 79  | UROSALPINX                  | 0.00  | 0.00  | 0.00  | 0.00  | 0.00  |
| 80  | UROSALPINX                  | 0.00  | 0.00  | 0.00  | 0.00  | 0.00  |
| 81  | UROSALPINX                  | 0.00  | 0.00  | 0.00  | 0.00  | 0.00  |



## EAST LONG COVE CORE 4

| NO. | TYPE                         | 51     | 139    |
|-----|------------------------------|--------|--------|
| 1   | PINUS HAPLOXYLON             | 0.00   | 17.27  |
| 2   | PINUS DIPLOXYLON             | 0.00   | 10.36  |
| 82  | TOTAL PINUS                  | 10.00  | 27.63  |
| 3   | PICEA                        | 0.00   | 1.00   |
| 5   | ABIES                        | 0.00   | 0.00   |
| 6   | TSUGA                        | 0.00   | 0.00   |
| 7   | FAGUS                        | 0.00   | 1.00   |
| 8   | ALNUS                        | 0.00   | 0.00   |
| 9   | ACER SACCHARUM               | 0.00   | 0.00   |
| 10  | QUERCUS                      | 30.00  | 36.84  |
| 11  | CASTANEA                     | 2.50   | 2.11   |
| 12  | CORYLIA                      | 0.00   | 0.00   |
| 13  | LIQUIDAMBAR                  | 0.00   | 1.00   |
| 14  | BETULA                       | 10.00  | 4.21   |
| 15  | JUGLANS UNDIFF.              | 0.00   | 0.00   |
| 16  | JUGLANS CINEREA              | 0.00   | 0.00   |
| 17  | JUGLANS NIGRA                | 0.00   | 0.00   |
| 18  | FRAXINUS PENNSYLVANICA-TYPE  | 0.00   | 0.00   |
| 19  | FRAXINUS NIGRA-TYPE          | 0.00   | 1.00   |
| 20  | ULMUS                        | 0.00   | 0.00   |
| 21  | OSTRYA/CARPINUS              | 0.00   | 0.00   |
| 22  | ACER RUBRUM                  | 0.00   | 0.00   |
| 23  | PLATANUS                     | 0.00   | 0.00   |
| 24  | CORYLUS                      | 0.00   | 0.00   |
| 25  | AMBROSIA-TYPE                | 21.00  | 11.00  |
| 26  | RUMEX                        | 7.00   | 4.74   |
| 27  | PLANTAGO LANCEOLATA          | 1.00   | 0.00   |
| 28  | PLANTAGO MAJOR               | 0.00   | 0.00   |
| 29  | REGIONAL SUM                 | 100.00 | 100.00 |
| 30  | RHAMNUS/VITIS                | 0.00   | 0.00   |
| 31  | THALICTRUM                   | 0.00   | 0.00   |
| 32  | IMPATIENS                    | 0.00   | 0.00   |
| 33  | URTICA                       | 0.00   | 0.00   |
| 34  | LABIATAE                     | 0.00   | 0.00   |
| 35  | LYCOPODIUM UNDIFF.           | 0.00   | 0.00   |
| 36  | LYCOPODIUM LUCIDULUM         | 0.00   | 0.00   |
| 37  | OSMUNDA UNDIFF.              | 0.00   | 0.00   |
| 38  | SPHAGNUM                     | 0.00   | 3.16   |
| 39  | PTERIDIUM                    | 1.00   | 0.00   |
| 40  | BOTRYCHUM                    | 0.00   | 0.00   |
| 41  | POTAMOGETON                  | 0.00   | 0.00   |
| 42  | NUPHAR                       | 0.00   | 0.00   |
| 43  | NYMPHAEA                     | 0.00   | 0.00   |
| 44  | CEPHALANTHUS                 | 1.00   | 0.00   |
| 45  | NYSSA                        | 1.00   | 0.00   |
| 46  | SALIX                        | 1.00   | 0.00   |
| 47  | ALNUS CF.                    | 0.00   | 1.58   |
| 48  | ILEX                         | 0.00   | 0.00   |
| 49  | SPARGANIUM-TYPE              | 2.00   | 0.00   |
| 50  | TYPHA                        | 1.00   | 0.00   |
| 51  | MONOLETE SPORE               | 0.00   | 0.00   |
| 52  | ARTEMISIA                    | 0.00   | 0.00   |
| 53  | LIGULIFLORAE UNDIFF.         | 20.00  | 7.37   |
| 54  | TUBULIFLORAE A               | 0.00   | 1.00   |
| 55  | TUBULIFLORAE B               | 0.00   | 0.00   |
| 56  | TUBULIFLORAE C               | 0.00   | 0.00   |
| 57  | LYCOPODIUM ANNOTINUM         | 0.00   | 0.00   |
| 58  | LYCOPODIUM TRISTACHYUM       | 0.00   | 0.00   |
| 59  | LYCOPODIUM INNDATUM          | 0.00   | 0.00   |
| 60  | POLYGONUM LAPATHIFOLIUM-TYPE | 0.00   | 0.00   |
| 61  | POLYGONACEAE                 | 0.00   | 0.00   |
| 62  | EPILOBIUM                    | 0.00   | 0.00   |
| 63  | UMBELLIFERAE                 | 0.00   | 0.00   |
| 64  | CRUCIFERAE                   | 0.00   | 0.00   |
| 65  | CARYOPHYLLACEAE              | 0.00   | 0.00   |
| 66  | ERICACEAE                    | 0.00   | 0.00   |
| 67  | CUPRESSACEAE                 | 1.00   | 0.00   |
| 68  | ROSACEAE UNDIFF.             | 2.00   | 0.00   |
| 69  | RHUS                         | 2.00   | 0.00   |
| 70  | MYRTICA-COMPTONIA            | 0.00   | 0.00   |
| 71  | IVA CF.                      | 0.00   | 0.00   |
| 72  | CYPERACEAE UNDIFF.           | 0.00   | 0.00   |
| 73  | CYPERACEAE A                 | 147.00 | 1.05   |
| 74  | CHENOPODIUM-TYPE             | 11.00  | 7.04   |
| 75  | CHENOPODIUM A                | 11.00  | 0.00   |
| 76  | CHENOPODIUM B                | 11.00  | 2.00   |
| 77  | CHENOPODIUM C                | 0.00   | 0.00   |
| 78  | GRAMINAE UNDIFF.             | 41.00  | 2.00   |
| 79  | RUPPIA                       | 0.00   | 0.00   |
| 80  | INDETERMINATE/OBSCURE        | 0.00   | 0.00   |
| 81  | UNKNOWN                      | 0.00   | 0.00   |

| 42. | TYPE                         | 65   | 74   | 51   | 93    |
|-----|------------------------------|------|------|------|-------|
| 1   | PINUS HAPLOXYLON             | 1.00 | 2.00 | 3.00 | 10.00 |
| 2   | PINUS DIPLOXYLON             | 0.00 | 0.00 | 0.00 | 0.00  |
| 3   | PINUS PINUS                  | 0.00 | 0.00 | 0.00 | 0.00  |
| 4   | ABIES                        | 0.00 | 0.00 | 0.00 | 0.00  |
| 5   | TSUGA                        | 0.00 | 0.00 | 0.00 | 0.00  |
| 6   | LAGERHODIA                   | 0.00 | 0.00 | 0.00 | 0.00  |
| 7   | TILIA                        | 0.00 | 0.00 | 0.00 | 0.00  |
| 8   | ACER SACCHARUM               | 0.00 | 0.00 | 0.00 | 0.00  |
| 9   | QUERCUS                      | 0.00 | 0.00 | 0.00 | 0.00  |
| 10  | CASTANEA                     | 0.00 | 0.00 | 0.00 | 0.00  |
| 11  | CARYA                        | 0.00 | 0.00 | 0.00 | 0.00  |
| 12  | LIQUIDAMBAR                  | 0.00 | 0.00 | 0.00 | 0.00  |
| 13  | BETULA                       | 0.00 | 0.00 | 0.00 | 0.00  |
| 14  | JUGLANS UNDIFF.              | 0.00 | 0.00 | 0.00 | 0.00  |
| 15  | JUGLANS CINEREA              | 0.00 | 0.00 | 0.00 | 0.00  |
| 16  | JUGLANS NIGRA                | 0.00 | 0.00 | 0.00 | 0.00  |
| 17  | FRAXINUS PENNSYLVANICA-TYPE  | 0.00 | 0.00 | 0.00 | 0.00  |
| 18  | FRAXINUS NIGRA-TYPE          | 0.00 | 0.00 | 0.00 | 0.00  |
| 19  | ULMUS                        | 0.00 | 0.00 | 0.00 | 0.00  |
| 20  | OSTEA/CARPINUS               | 0.00 | 0.00 | 0.00 | 0.00  |
| 21  | ACER RUPRUM                  | 0.00 | 0.00 | 0.00 | 0.00  |
| 22  | PLATANUS                     | 0.00 | 0.00 | 0.00 | 0.00  |
| 23  | CORYLUS                      | 0.00 | 0.00 | 0.00 | 0.00  |
| 24  | ALNUS-TYPE                   | 0.00 | 0.00 | 0.00 | 0.00  |
| 25  | RUMEX                        | 0.00 | 0.00 | 0.00 | 0.00  |
| 26  | PLANTAGO LANCEOLATA          | 0.00 | 0.00 | 0.00 | 0.00  |
| 27  | PLANTAGO MAJOR               | 0.00 | 0.00 | 0.00 | 0.00  |
| 28  | REGIUM SUM                   | 0.00 | 0.00 | 0.00 | 0.00  |
| 29  | RHAMNUS/VITIS                | 0.00 | 0.00 | 0.00 | 0.00  |
| 30  | THALICTRUM                   | 0.00 | 0.00 | 0.00 | 0.00  |
| 31  | IMPATIENS                    | 0.00 | 0.00 | 0.00 | 0.00  |
| 32  | URTICA                       | 0.00 | 0.00 | 0.00 | 0.00  |
| 33  | ABETAE                       | 0.00 | 0.00 | 0.00 | 0.00  |
| 34  | LYCOPodium UNDIFF.           | 0.00 | 0.00 | 0.00 | 0.00  |
| 35  | LYCOPodium LUCIDUM           | 0.00 | 0.00 | 0.00 | 0.00  |
| 36  | OSMUNDA UNDIFF.              | 0.00 | 0.00 | 0.00 | 0.00  |
| 37  | SPERMATOPHYTES               | 0.00 | 0.00 | 0.00 | 0.00  |
| 38  | PTERIDOPHYTES                | 0.00 | 0.00 | 0.00 | 0.00  |
| 39  | ROTELLIDOPHYTES              | 0.00 | 0.00 | 0.00 | 0.00  |
| 40  | POTAMOGETON                  | 0.00 | 0.00 | 0.00 | 0.00  |
| 41  | NYMPHAEA                     | 0.00 | 0.00 | 0.00 | 0.00  |
| 42  | CEPHALANTHUS                 | 0.00 | 0.00 | 0.00 | 0.00  |
| 43  | MYSSA                        | 0.00 | 0.00 | 0.00 | 0.00  |
| 44  | SALIX                        | 0.00 | 0.00 | 0.00 | 0.00  |
| 45  | ALNUS CF.                    | 0.00 | 0.00 | 0.00 | 0.00  |
| 46  | ILEX                         | 0.00 | 0.00 | 0.00 | 0.00  |
| 47  | SPERMATOPHYTES               | 0.00 | 0.00 | 0.00 | 0.00  |
| 48  | TYPHI                        | 0.00 | 0.00 | 0.00 | 0.00  |
| 49  | MONOCOTYLEDON SPORE          | 0.00 | 0.00 | 0.00 | 0.00  |
| 50  | ARTICISIA                    | 0.00 | 0.00 | 0.00 | 0.00  |
| 51  | LIGULIFLORAE                 | 0.00 | 0.00 | 0.00 | 0.00  |
| 52  | TUBULIFLORAE UNDIFF.         | 0.00 | 0.00 | 0.00 | 0.00  |
| 53  | TUBULIFLORAE A               | 0.00 | 0.00 | 0.00 | 0.00  |
| 54  | TUBULIFLORAE B               | 0.00 | 0.00 | 0.00 | 0.00  |
| 55  | TUBULIFLORAE C               | 0.00 | 0.00 | 0.00 | 0.00  |
| 56  | LYCOPodium ANNOCIUM          | 0.00 | 0.00 | 0.00 | 0.00  |
| 57  | LYCOPodium TRISTICHYUM       | 0.00 | 0.00 | 0.00 | 0.00  |
| 58  |                              | 0.00 | 0.00 | 0.00 | 0.00  |
| 59  | LYCOPodium INUNDIUM          | 0.00 | 0.00 | 0.00 | 0.00  |
| 60  | POLYPODIUM LAPATIFOLIUM-TYPE | 0.00 | 0.00 | 0.00 | 0.00  |
| 61  | POLYPODIACEAE                | 0.00 | 0.00 | 0.00 | 0.00  |
| 62  | FERULACEAE                   | 0.00 | 0.00 | 0.00 | 0.00  |
| 63  | LYCOPodium                   | 0.00 | 0.00 | 0.00 | 0.00  |
| 64  | LYCOPodium                   | 0.00 | 0.00 | 0.00 | 0.00  |
| 65  | LYCOPodium                   | 0.00 | 0.00 | 0.00 | 0.00  |
| 66  | CARYOPHYLLACEAE              | 0.00 | 0.00 | 0.00 | 0.00  |
| 67  | LYCOPodium                   | 0.00 | 0.00 | 0.00 | 0.00  |
| 68  | CUPRESSACEAE                 | 0.00 | 0.00 | 0.00 | 0.00  |
| 69  | LYCOPodium UNDIFF.           | 0.00 | 0.00 | 0.00 | 0.00  |
| 70  | RHIZ                         | 0.00 | 0.00 | 0.00 | 0.00  |
| 71  | LYCOPodium-COMPTONIA         | 0.00 | 0.00 | 0.00 | 0.00  |
| 72  | LYCOPodium                   | 0.00 | 0.00 | 0.00 | 0.00  |
| 73  | CYPERACEAE UNDIFF.           | 0.00 | 0.00 | 0.00 | 0.00  |
| 74  | CYPERACEAE A                 | 0.00 | 0.00 | 0.00 | 0.00  |
| 75  | CYPERACEAE B                 | 0.00 | 0.00 | 0.00 | 0.00  |
| 76  | CYPERACEAE C                 | 0.00 | 0.00 | 0.00 | 0.00  |
| 77  | CYPERACEAE D                 | 0.00 | 0.00 | 0.00 | 0.00  |
| 78  | CYPERACEAE E                 | 0.00 | 0.00 | 0.00 | 0.00  |
| 79  | CYPERACEAE F                 | 0.00 | 0.00 | 0.00 | 0.00  |
| 80  | CYPERACEAE G                 | 0.00 | 0.00 | 0.00 | 0.00  |
| 81  | CYPERACEAE H                 | 0.00 | 0.00 | 0.00 | 0.00  |
| 82  | CYPERACEAE I                 | 0.00 | 0.00 | 0.00 | 0.00  |
| 83  | CYPERACEAE J                 | 0.00 | 0.00 | 0.00 | 0.00  |
| 84  | CYPERACEAE K                 | 0.00 | 0.00 | 0.00 | 0.00  |
| 85  | CYPERACEAE L                 | 0.00 | 0.00 | 0.00 | 0.00  |
| 86  | CYPERACEAE M                 | 0.00 | 0.00 | 0.00 | 0.00  |
| 87  | CYPERACEAE N                 | 0.00 | 0.00 | 0.00 | 0.00  |
| 88  | CYPERACEAE O                 | 0.00 | 0.00 | 0.00 | 0.00  |
| 89  | CYPERACEAE P                 | 0.00 | 0.00 | 0.00 | 0.00  |
| 90  | CYPERACEAE Q                 | 0.00 | 0.00 | 0.00 | 0.00  |
| 91  | CYPERACEAE R                 | 0.00 | 0.00 | 0.00 | 0.00  |
| 92  | CYPERACEAE S                 | 0.00 | 0.00 | 0.00 | 0.00  |
| 93  | CYPERACEAE T                 | 0.00 | 0.00 | 0.00 | 0.00  |
| 94  | CYPERACEAE U                 | 0.00 | 0.00 | 0.00 | 0.00  |
| 95  | CYPERACEAE V                 | 0.00 | 0.00 | 0.00 | 0.00  |
| 96  | CYPERACEAE W                 | 0.00 | 0.00 | 0.00 | 0.00  |
| 97  | CYPERACEAE X                 | 0.00 | 0.00 | 0.00 | 0.00  |
| 98  | CYPERACEAE Y                 | 0.00 | 0.00 | 0.00 | 0.00  |
| 99  | CYPERACEAE Z                 | 0.00 | 0.00 | 0.00 | 0.00  |
| 100 | CYPERACEAE                   | 0.00 | 0.00 | 0.00 | 0.00  |



[illegible]

| NO. | TYPE                         | 159    | 197    | 204    | 209    |
|-----|------------------------------|--------|--------|--------|--------|
| 1   | PINUS PARLOXYLON             | 14.95  | 4.08   | 30.07  | 0.00   |
| 2   | PINUS DIPLOXYLON             | 19.88  | 24.36  | 0.00   | 22.30  |
| 3   | TOTAL PINUS                  | 34.83  | 28.44  | 30.07  | 22.30  |
| 4   | PICEA                        | 1.00   | 0.00   | 0.00   | 0.00   |
| 5   | ABIES                        | 0.00   | 0.00   | 0.00   | 0.00   |
| 6   | TSUGA                        | 4.35   | 8.42   | 1.78   | 4.82   |
| 7   | FAGUS                        | 1.45   | 1.50   | 1.40   | 3.61   |
| 8   | TILOA                        | 0.00   | 0.00   | 1.70   | 0.00   |
| 9   | ACER SACCHARUM               | 0.00   | 0.53   | 0.78   | 0.00   |
| 10  | QUERCUS                      | 26.81  | 38.98  | 45.46  | 44.58  |
| 11  | MASTANEA                     | 0.00   | 1.00   | 1.48   | 2.41   |
| 12  | CARYA                        | 2.17   | 2.11   | 3.38   | 7.23   |
| 13  | LITOID AMAR                  | 0.00   | 0.00   | 0.00   | 0.00   |
| 14  | DEQUILA                      | 18.84  | 10.00  | 0.00   | 4.10   |
| 15  | JUGLANS UNDIFF.              | 0.00   | 0.00   | 0.00   | 0.00   |
| 16  | JUGLANS CINEREA              | 0.00   | 0.00   | 0.00   | 0.00   |
| 17  | JUGLANS NIGRA                | 0.00   | 0.53   | 1.78   | 0.00   |
| 18  | FRAXINUS PENNSYLVANICA-TYPE  | 0.00   | 0.00   | 1.40   | 0.00   |
| 19  | FRAXINUS NIGRA-TYPE          | 0.00   | 1.50   | 1.78   | 2.41   |
| 20  | ULMUS                        | 0.00   | 0.53   | 0.00   | 0.00   |
| 21  | ASTRYA/CARPINUS              | 0.72   | 0.00   | 2.80   | 1.20   |
| 22  | ACER RUBRUM                  | 0.00   | 0.00   | 0.00   | 0.00   |
| 23  | PLATANUS                     | 0.00   | 0.53   | 0.70   | 0.00   |
| 24  | CORYLUS                      | 0.00   | 0.00   | 0.00   | 0.00   |
| 25  | AMRPOSIA-TYPE                | 7.97   | 2.63   | 5.50   | 3.61   |
| 26  | PUMEX                        | 1.45   | 0.53   | 0.78   | 0.00   |
| 27  | PLANTAGO LANCEOLATA          | 0.00   | 0.00   | 0.00   | 0.00   |
| 28  | PLANTAGO MAJOR               | 0.00   | 0.00   | 0.00   | 0.00   |
| 29  | REGIONAL SUM                 | 100.00 | 100.00 | 100.00 | 100.00 |
| 30  | PHAMNUS/VITIS                | 0.00   | 0.00   | 0.00   | 0.00   |
| 31  | THALITRUM                    | 0.00   | 0.00   | 0.00   | 0.00   |
| 32  | IMPATIENS                    | 0.00   | 0.00   | 0.00   | 0.00   |
| 33  | URTICA                       | 0.00   | 0.00   | 0.00   | 0.00   |
| 34  | LARIATAE                     | 0.00   | 0.00   | 0.00   | 0.00   |
| 35  | LYCOPODIUM UNDIFF.           | 0.00   | 0.00   | 0.00   | 0.00   |
| 36  | LYCOPODIUM LUCIDULUM         | 0.00   | 0.00   | 0.00   | 0.00   |
| 37  | OSMUNDA UNDIFF.              | 0.00   | 0.53   | 0.00   | 0.00   |
| 38  | SPHAGNUM                     | 0.00   | 0.00   | 0.00   | 0.00   |
| 39  | PTERIDIUM                    | 0.72   | 1.00   | 2.80   | 1.20   |
| 40  | PTERIDIUM                    | 0.00   | 0.00   | 0.00   | 0.00   |
| 41  | POTAMOGETON                  | 0.00   | 0.00   | 0.00   | 0.00   |
| 42  | NUPHAR                       | 0.00   | 0.00   | 0.00   | 0.00   |
| 43  | NYMFAEA                      | 0.00   | 0.00   | 0.00   | 0.00   |
| 44  | CEPHALANTHUS                 | 0.00   | 0.00   | 0.00   | 0.00   |
| 45  | MYSSA                        | 0.00   | 0.53   | 0.00   | 0.00   |
| 46  | SALIX CF.                    | 2.17   | 1.50   | 0.00   | 0.00   |
| 47  | ILEY                         | 6.00   | 0.00   | 1.40   | 0.00   |
| 48  | SPARGANIUM-TYPE              | 0.00   | 1.50   | 0.00   | 0.00   |
| 49  | LYPHA                        | 0.00   | 0.00   | 1.40   | 1.20   |
| 50  | MONOLETE SPORE               | 0.00   | 0.00   | 1.40   | 2.41   |
| 51  | ARTEMISIA                    | 0.00   | 0.00   | 0.00   | 0.00   |
| 52  | LITGULIFLOPAE                | 0.00   | 0.00   | 0.00   | 0.00   |
| 53  | TURBULIFLOPAE UNDIFF.        | 1.45   | 1.50   | 1.40   | 91.57  |
| 54  | TURBULIFLOPAE A              | 0.72   | 0.53   | 0.00   | 4.62   |
| 55  | TURBULIFLOPAE B              | 0.00   | 0.00   | 0.00   | 0.00   |
| 56  | TURBULIFLOPAE C              | 0.00   | 0.00   | 0.00   | 0.00   |
| 57  | LYCOPODIUM ANNOTINUM         | 0.00   | 0.00   | 0.00   | 0.00   |
| 58  | LYCOPODIUM TRISTACHYUM       | 0.00   | 0.00   | 0.00   | 0.00   |
| 59  | LYCOPODIUM INUNDATUM         | 0.00   | 0.00   | 0.00   | 0.00   |
| 60  | POLYGONUM LAPATHIFOLIUM-TYPE | 0.00   | 0.00   | 0.00   | 0.00   |
| 61  | POLYGONACEAE                 | 0.00   | 0.00   | 0.00   | 0.00   |
| 62  | ERIGONUM                     | 0.00   | 0.00   | 0.00   | 0.00   |
| 63  | UNDIFFERENTIAL               | 0.00   | 0.00   | 0.00   | 0.00   |
| 64  | DICTYOTERPAE                 | 0.00   | 0.00   | 0.00   | 0.00   |
| 65  | DICTYOTERPAE                 | 0.00   | 0.00   | 0.00   | 0.00   |
| 66  | DICTYOTERPAE                 | 0.00   | 0.00   | 0.00   | 0.00   |
| 67  | DICTYOTERPAE                 | 0.00   | 0.00   | 0.00   | 0.00   |
| 68  | DICTYOTERPAE                 | 0.00   | 0.00   | 0.00   | 0.00   |
| 69  | DICTYOTERPAE                 | 0.00   | 0.00   | 0.00   | 0.00   |
| 70  | DICTYOTERPAE                 | 0.00   | 0.00   | 0.00   | 0.00   |
| 71  | DICTYOTERPAE                 | 0.00   | 0.00   | 0.00   | 0.00   |
| 72  | DICTYOTERPAE                 | 0.00   | 0.00   | 0.00   | 0.00   |
| 73  | DICTYOTERPAE                 | 0.00   | 0.00   | 0.00   | 0.00   |
| 74  | DICTYOTERPAE                 | 0.00   | 0.00   | 0.00   | 0.00   |
| 75  | DICTYOTERPAE                 | 0.00   | 0.00   | 0.00   | 0.00   |

| NO. | TYPE                        | 274    | 282    | 288    | DEPTH<br>296 |
|-----|-----------------------------|--------|--------|--------|--------------|
| 1   | PINUS HAPLOXYLON            | 17.89  | 14.47  | 9.88   | 48.44        |
| 2   | PINUS DIPLOXYLON            | 17.89  | 14.47  | 9.88   | 48.44        |
| 3   | TOTAL PINUS                 | 29.74  | 32.88  | 29.81  | 48.44        |
| 4   | PICEA                       | 0.00   | 0.00   | 0.00   | 0.00         |
| 5   | ABIES                       | 0.00   | 0.00   | 0.00   | 0.00         |
| 6   | TSUGA                       | 0.00   | 0.00   | 0.00   | 0.00         |
| 7   | FAGUS                       | 0.00   | 0.00   | 0.00   | 0.00         |
| 8   | TILIA                       | 0.00   | 0.00   | 0.00   | 0.00         |
| 9   | ACER SACCHARUM              | 0.00   | 0.00   | 0.00   | 0.00         |
| 10  | QUERCUS                     | 38.88  | 29.88  | 48.88  | 21.88        |
| 11  | CASTANEA                    | 2.00   | 1.00   | 1.00   | 7.00         |
| 12  | CARYA                       | 0.00   | 0.00   | 0.00   | 0.00         |
| 13  | LIQUIDAMBAR                 | 0.00   | 0.00   | 0.00   | 0.00         |
| 14  | BETULA                      | 0.00   | 18.00  | 14.00  | 4.00         |
| 15  | JUGLANS UNDIFF.             | 0.00   | 0.00   | 0.00   | 0.00         |
| 16  | JUGLANS CINEREA             | 0.00   | 0.00   | 0.00   | 0.00         |
| 17  | JUGLANS NIGRA               | 0.00   | 0.00   | 0.00   | 0.00         |
| 18  | FRAXINUS PENNSYLVANICA-TYPE | 0.00   | 0.00   | 0.00   | 0.00         |
| 19  | FRAXINUS NIGRA-TYPE         | 0.00   | 0.00   | 0.00   | 0.00         |
| 20  | ULMUS                       | 0.00   | 0.00   | 0.00   | 0.00         |
| 21  | OSTRYA CARPINUS             | 0.00   | 0.00   | 0.00   | 0.00         |
| 22  | ACER RUBRUM                 | 0.00   | 0.00   | 0.00   | 0.00         |
| 23  | PLATANUS                    | 0.00   | 0.00   | 0.00   | 0.00         |
| 24  | CORYLUS                     | 0.00   | 0.00   | 0.00   | 0.00         |
| 25  | AMBROSIA-TYPE               | 0.00   | 0.00   | 0.00   | 0.00         |
| 26  | RUMEX                       | 2.00   | 0.00   | 0.00   | 0.00         |
| 27  | PLANTAGO LANCEOLATA         | 0.00   | 0.00   | 0.00   | 0.00         |
| 28  | PLANTAGO MAJOR              | 0.00   | 0.00   | 0.00   | 0.00         |
| 29  | REGIONAL SUM                | 100.00 | 100.00 | 100.00 | 100.00       |
| 30  | RHAMNUS/VITIS               | 0.00   | 0.00   | 0.00   | 0.00         |
| 31  | THALICTRUM                  | 0.00   | 0.00   | 0.00   | 0.00         |
| 32  | IMPATIENS                   | 0.00   | 0.00   | 0.00   | 0.00         |
| 33  | URTICA                      | 0.00   | 0.00   | 0.00   | 0.00         |
| 34  | LABIATAE                    | 0.00   | 0.00   | 0.00   | 0.00         |
| 35  | LYCOPODIUM UNDIFF.          | 0.00   | 0.00   | 0.00   | 0.00         |
| 36  | LYCOPODIUM LUCIDULUM        | 0.00   | 0.00   | 0.00   | 0.00         |
| 37  | OSMUNDA UNDIFF.             | 0.00   | 1.00   | 0.00   | 4.00         |
| 38  | SPHAGNUM                    | 0.00   | 0.00   | 0.00   | 0.00         |
| 39  | PTERIDIUM                   | 1.00   | 0.00   | 0.00   | 7.00         |
| 40  | BOTRYCHUM                   | 0.00   | 0.00   | 0.00   | 0.00         |
| 41  | POTAMOGETON                 | 0.00   | 0.00   | 0.00   | 0.00         |
| 42  | NUPHAR                      | 0.00   | 0.00   | 0.00   | 0.00         |
| 43  | NYMPHAEA                    | 0.00   | 0.00   | 0.00   | 0.00         |
| 44  | CEPHALANTHUS                | 0.00   | 0.00   | 0.00   | 0.00         |
| 45  | NYSSA                       | 0.00   | 0.00   | 0.00   | 0.00         |
| 46  | SALIX                       | 0.00   | 0.00   | 0.00   | 0.00         |
| 47  | ALNUS CF.                   | 0.00   | 0.00   | 0.00   | 0.00         |
| 48  | ILEX                        | 0.00   | 0.00   | 1.00   | 3.00         |
| 49  | SPARGANIUM-TYPE             | 0.00   | 0.00   | 0.00   | 0.00         |
| 50  | TYPHA                       | 0.00   | 0.00   | 0.00   | 0.00         |
| 51  | MONOCOTYLEDON SPORE         | 0.00   | 0.00   | 1.00   | 2.00         |
| 52  | ARTEMISIA                   | 0.00   | 0.00   | 0.00   | 0.00         |
| 53  | LIGULIFLORAE UNDIFF.        | 12.00  | 0.00   | 24.00  | 21.00        |
| 54  | TUBULIFLORAE A              | 0.00   | 0.00   | 0.00   | 0.00         |
| 55  | TUBULIFLORAE B              | 0.00   | 0.00   | 0.00   | 0.00         |
| 56  | TUBULIFLORAE C              | 0.00   | 0.00   | 0.00   | 0.00         |
| 57  | LYCOPODIUM ANNOTINUM        | 0.00   | 0.00   | 0.00   | 0.00         |
| 58  | LYCOPODIUM TRISTACHYUM      | 0.00   | 0.00   | 0.00   | 0.00         |
| 59  | LYCOPODIUM LIMBOSUM         | 0.00   | 0.00   | 0.00   | 0.00         |
| 60  | POLYPODIUM LATHRAEUM-TYPE   | 0.00   | 0.00   | 0.00   | 0.00         |
| 61  | POLYGONACEAE                | 0.00   | 0.00   | 0.00   | 0.00         |
| 62  | EPILORIUM                   | 0.00   | 0.00   | 0.00   | 0.00         |
| 63  | UMBELLIFERAE                | 0.00   | 0.00   | 0.00   | 0.00         |
| 64  | CRUCIFERAE                  | 0.00   | 0.00   | 0.00   | 0.00         |
| 65  | CARYOPHYLLACEAE             | 0.00   | 0.00   | 0.00   | 0.00         |
| 66  | ERICACEAE                   | 0.00   | 0.00   | 0.00   | 0.00         |
| 67  | CUPRESSACEAE                | 0.00   | 0.00   | 0.00   | 0.00         |
| 68  | ROSACEAE UNDIFF.            | 0.00   | 0.00   | 0.00   | 0.00         |
| 69  | RHUS                        | 0.00   | 0.00   | 0.00   | 0.00         |
| 70  | MYRICA-COMPTONIA            | 0.00   | 1.00   | 1.00   | 2.00         |
| 71  | IVA CF.                     | 0.00   | 0.00   | 0.00   | 0.00         |
| 72  | CYPERACEAE UNDIFF.          | 0.00   | 0.00   | 0.00   | 0.00         |
| 73  | CYPERACEAE A                | 0.00   | 0.00   | 0.00   | 0.00         |
| 74  | CHENOPODIUM-TYPE            | 0.00   | 0.00   | 0.00   | 0.00         |
| 75  | CHENOPODIUM A               | 9.00   | 3.00   | 0.00   | 0.00         |
| 76  | CHENOPODIUM B               | 0.00   | 0.00   | 0.00   | 0.00         |
| 77  | CHENOPODIUM C               | 0.00   | 0.00   | 0.00   | 0.00         |
| 78  | GRAMINAE UNDIFF.            | 106.00 | 1.00   | 3.00   | 2.00         |
| 79  | RUPPIA                      | 0.00   | 0.00   | 0.00   | 0.00         |
| 80  | INDETERMINATE/OBSCURE       | 14.00  | 2.00   | 4.00   | 12.00        |
| 81  | UNKNOWN                     | 0.00   | 0.00   | 0.00   | 0.00         |

| NO. | TYPE                        | 129    | 166    | 174   |
|-----|-----------------------------|--------|--------|-------|
| 1   | PINUS HAPLOXYLON            | 25.42  | 0.82   | 12.81 |
| 2   | PINUS DIPLOXYLON            | 8.89   | 11.71  | 12.81 |
| 3   | TOTAL PINUS                 | 25.42  | 22.53  | 25.62 |
| 4   | PICEA                       | 0.08   | 0.48   | 1.06  |
| 5   | ABIES                       | 0.08   | 0.08   | 0.08  |
| 6   | TSUGA                       | 0.08   | 0.48   | 0.08  |
| 7   | FAGUS                       | 0.08   | 0.08   | 0.08  |
| 8   | TILIA                       | 0.08   | 0.08   | 0.08  |
| 9   | ACER SACCHARUM              | 0.08   | 0.08   | 0.08  |
| 10  | JUERCUS                     | 37.29  | 42.73  | 12.77 |
| 11  | CASTANEA                    | 0.08   | 0.08   | 0.08  |
| 12  | CARYA                       | 1.69   | 1.69   | 0.08  |
| 13  | LIQUIDAMBA                  | 0.08   | 0.08   | 0.08  |
| 14  | BETULA                      | 0.47   | 1.95   | 0.08  |
| 15  | JUGLANS UNDIFF.             | 0.08   | 0.08   | 0.08  |
| 16  | JUGLANS CINEREA             | 0.08   | 0.08   | 0.08  |
| 17  | JUGLANS NIGRA               | 0.08   | 0.08   | 0.08  |
| 18  | FRAXINUS PENNSYLVANICA-TYPE | 0.08   | 0.08   | 0.08  |
| 19  | FRAXINUS NIGRA-TYPE         | 3.39   | 0.08   | 0.08  |
| 20  | ULMUS                       | 1.69   | 0.08   | 0.08  |
| 21  | OSTRYA CARPINUS             | 0.08   | 0.08   | 0.08  |
| 22  | ACER RUBRUM                 | 1.69   | 0.08   | 0.08  |
| 23  | PLATANUS                    | 0.08   | 0.08   | 0.08  |
| 24  | CORYLUS                     | 0.08   | 0.08   | 0.08  |
| 25  | AMBROSIA-TYPE               | 5.08   | 2.26   | 0.08  |
| 26  | RUMEX                       | 6.78   | 0.08   | 0.08  |
| 27  | PLANTAGO LANCEOLATA         | 0.08   | 0.08   | 0.08  |
| 28  | PLANTAGO MAJOR              | 0.08   | 0.08   | 0.08  |
| 29  | REGIONAL-SUN                | 18.88  | 18.88  | 18.88 |
| 30  | RHAMNUS VITIS               | 0.08   | 0.08   | 0.08  |
| 31  | THALICTRUM                  | 0.08   | 0.08   | 0.08  |
| 32  | IMPATIENS                   | 0.08   | 0.08   | 0.08  |
| 33  | JR-IOA                      | 0.08   | 0.08   | 0.08  |
| 34  | LABIATAE                    | 0.08   | 0.08   | 0.08  |
| 35  | LYCOPodium UNDIFF.          | 0.08   | 0.08   | 0.08  |
| 36  | LYCOPodium LUCIDULUM        | 1.69   | 0.08   | 0.08  |
| 37  | OSMUNDA UNDIFF.             | 0.08   | 0.08   | 0.08  |
| 38  | SPHAGNUM                    | 1.69   | 0.08   | 0.08  |
| 39  | PTERIDIUM                   | 1.69   | 0.08   | 0.08  |
| 40  | BOTRYCHUM                   | 0.08   | 0.08   | 0.08  |
| 41  | POTAMOGETON                 | 0.08   | 0.08   | 0.08  |
| 42  | NUPHAR                      | 0.08   | 0.08   | 0.08  |
| 43  | NYMFAEA                     | 0.08   | 0.08   | 0.08  |
| 44  | CEPHALANTHUS                | 0.08   | 0.08   | 0.08  |
| 45  | MYSSA                       | 0.08   | 0.08   | 0.08  |
| 46  | SALIX                       | 1.69   | 0.08   | 0.08  |
| 47  | ALNUS CF.                   | 0.08   | 2.26   | 0.08  |
| 48  | ILEX                        | 0.08   | 0.08   | 0.08  |
| 49  | SPARGANIUM-TYPE             | 0.08   | 0.08   | 0.08  |
| 50  | TYPHA                       | 0.08   | 0.08   | 0.08  |
| 51  | MONOLETE SPORE              | 0.08   | 4.57   | 0.08  |
| 52  | ARTEMISIA                   | 0.08   | 0.08   | 0.08  |
| 53  | LIGULIFLORAE                | 0.08   | 0.08   | 0.08  |
| 54  | TUBULIFLORAE UNDIFF.        | 6.78   | 13.41  | 4.88  |
| 55  | TUBULIFLORAE A              | 1.69   | 0.08   | 0.08  |
| 56  | TUBULIFLORAE B              | 0.08   | 0.08   | 0.08  |
| 57  | TUBULIFLORAE C              | 0.08   | 0.08   | 0.08  |
| 58  | LYCOPodium ANNOTINUM        | 0.08   | 0.08   | 0.08  |
| 59  | LYCOPodium TRISTACHYUM      | 0.08   | 0.08   | 0.08  |
| 60  | LYCOPodium INUNDATUM        | 0.08   | 0.08   | 0.08  |
| 61  | POLYGONUM LAPHYFOLIUM-TYPE  | 0.08   | 0.08   | 0.08  |
| 62  | POLYGONACEAE                | 0.08   | 0.08   | 0.08  |
| 63  | EPILORIUM                   | 0.08   | 0.08   | 0.08  |
| 64  | UMBELLIFEREAE               | 0.08   | 0.08   | 0.08  |
| 65  | CRUCIFERAE                  | 0.08   | 0.08   | 0.08  |
| 66  | CARYOPHYLLACEAE             | 0.08   | 0.08   | 0.08  |
| 67  | ERICACEAE                   | 0.08   | 0.08   | 0.08  |
| 68  | RUPESTRACEAE                | 0.08   | 0.08   | 0.08  |
| 69  | ROSACEAE UNDIFF.            | 0.08   | 0.08   | 0.08  |
| 70  | RHUS                        | 0.08   | 18.41  | 14.88 |
| 71  | MYRICA-COMPTONIA            | 6.78   | 11.71  | 13.41 |
| 72  | IVA CF.                     | 0.08   | 0.08   | 0.08  |
| 73  | CYPERACEAE UNDIFF.          | 18.88  | 12.81  | 0.08  |
| 74  | CYPERACEAE A                | 328.34 | 149.77 | 22.81 |
| 75  | CHENOPodium-TYPE            | 0.08   | 3.17   | 5.79  |
| 76  | CHENOPodium A               | 0.08   | 17.81  | 4.88  |
| 77  | CHENOPodium B               | 0.08   | 0.08   | 0.08  |
| 78  | CHENOPodium C               | 0.08   | 0.08   | 0.08  |
| 79  | GRAMINAE UNDIFF.            | 35.59  | 41.88  | 13.41 |
| 80  | RUBIDIA                     | 44.88  | 34.88  | 9.88  |
| 81  | INDETERMINATE/OBSCURE       | 0.08   | 0.08   | 0.08  |
| 82  | UNKNOWN                     | 0.08   | 0.08   | 0.08  |

| LONG COVE CORE 1 |                                | 267   |
|------------------|--------------------------------|-------|
| 4).              | TYPE                           |       |
| 1                | PINUS HAPLOXYLON               | 2.88  |
| 2                | PINUS DIPLOXYLON               | 22.38 |
| 3                | PINUS                          | 2.00  |
| 4                | ABIES                          | 0.00  |
| 5                | TSUGA                          | 0.00  |
| 6                | QUERCUS                        | 0.00  |
| 7                | FRAXINUS                       | 0.00  |
| 8                | ALNUS                          | 0.00  |
| 9                | ACER SACCHARUM                 | 4.00  |
| 10               | QUERCUS                        | 32.12 |
| 11               | CORYLUS                        | 2.00  |
| 12               | CORYLUS                        | 0.00  |
| 13               | CORYLUS                        | 0.00  |
| 14               | LIQUIDAMBAR                    | 1.00  |
| 15               | BETULA                         | 0.00  |
| 16               | JUGLANS UNDIFF.                | 0.00  |
| 17               | JUGLANS CINEREA                | 0.00  |
| 18               | JUGLANS NIGRA                  | 0.00  |
| 19               | FRAXINUS PENNSYLVANICA-TYPE    | 0.00  |
| 20               | FRAXINUS NIGRA-TYPE            | 0.00  |
| 21               | U. MUS                         | 0.00  |
| 22               | OSTREA/CARPINUS                | 0.96  |
| 23               | ACER RUBRUM                    | 0.00  |
| 24               | PLATANUS                       | 0.00  |
| 25               | CORYLUS                        | 0.00  |
| 26               | AMBRICIA-TYPE                  | 0.00  |
| 27               | RUMEX                          | 0.00  |
| 28               | PLANTAGO LANCEOLATA            | 0.00  |
| 29               | PLANTAGO MAJOR                 | 0.00  |
| 30               | REGIUM SUM                     | 10.00 |
| 31               | RHAPHANUS                      | 0.00  |
| 32               | THALICTRUM                     | 0.00  |
| 33               | IMPATIENS                      | 0.00  |
| 34               | URTICA                         | 0.00  |
| 35               | LARIX                          | 0.00  |
| 36               | LYCOPodium UNDIFF.             | 0.00  |
| 37               | LYCOPodium LUCIDUM             | 0.00  |
| 38               | OSMUNDA UNDIFF.                | 0.00  |
| 39               | SPHAGNUM                       | 1.00  |
| 40               | STELLARIA                      | 0.00  |
| 41               | BOERHAVIA                      | 0.00  |
| 42               | POTAMOGETON                    | 0.00  |
| 43               | NYMPHAEA                       | 0.00  |
| 44               | CEPHALANTHUS                   | 0.00  |
| 45               | NYSSA                          | 0.00  |
| 46               | SALIX                          | 0.00  |
| 47               | ALNUS CF.                      | 2.00  |
| 48               | ILEX                           | 0.00  |
| 49               | SPARGANIUM-TYPE                | 0.00  |
| 50               | TYPHA                          | 0.00  |
| 51               | MONOCOTYLEDON SPORE            | 0.96  |
| 52               | ARTHRISIA                      | 0.00  |
| 53               | LIGULIFLORAE                   | 0.00  |
| 54               | TURBIDIFLORAE UNDIFF.          | 26.00 |
| 55               | TURBIDIFLORAE A                | 0.00  |
| 56               | TURBIDIFLORAE B                | 0.00  |
| 57               | TURBIDIFLORAE C                | 0.00  |
| 58               | LYCOPodium ANNCTINUM           | 0.00  |
| 59               | LYCOPodium TRISTICHUM          | 0.00  |
| 60               | LYCOPodium INUNDATUM           | 0.00  |
| 61               | POLYTRICHUM LAPATHIFOLIUM-TYPE | 0.00  |
| 62               | POLYTRICHUM                    | 0.00  |
| 63               | SPERMATOPHYTES                 | 0.00  |
| 64               | QUERCUS                        | 0.00  |
| 65               | CARYOPHYLLACEAE                | 0.00  |
| 66               | ERICACEAE                      | 0.96  |
| 67               | RUSSULA                        | 0.00  |
| 68               | POSA. UNDIFF.                  | 0.00  |
| 69               | RUSSULA                        | 0.30  |
| 70               | MYRICA-COMPTONIA               | 1.44  |
| 71               | IVAX                           | 0.48  |
| 72               | CYPRESSACEAE UNDIFF.           | 44.60 |
| 73               | CYPRESSACEAE A                 | 67.15 |
| 74               | CHENOPODIUM-TYPE               | 20.62 |
| 75               | CHENOPODIUM A                  | 0.00  |
| 76               | CHENOPODIUM B                  | 0.00  |
| 77               | CHENOPODIUM C                  | 0.00  |
| 78               | GRAMINEAE UNDIFF.              | 23.98 |
| 79               | PIDEA                          | 0.00  |
| 80               | INDETERMINATE/OBSOLETE         | 47.48 |
| 81               | UNKNOWN                        | 6.24  |



| NO. | TYPE             | 151   | 162   |
|-----|------------------|-------|-------|
| 1   | PINUS HAPLOXYLON | 22.83 | 3.44  |
| 2   | PINUS DIPLOXYLON | 22.83 | 24.64 |
| 3   | PINUS            | 22.83 | 24.64 |
| 4   | PICEA            | 0.00  | 0.00  |
| 5   | ABIES            | 0.00  | 0.00  |
| 6   | TSUGA            | 0.00  | 0.00  |
| 7   | FAGUS            | 0.00  | 0.00  |
| 8   | QUERCUS          | 0.00  | 0.00  |
| 9   | ALNUS            | 0.00  | 0.00  |
| 10  | AMER. SACCHARUM  | 0.00  | 0.00  |
| 11  | AMER. RUBRUM     | 0.00  | 0.00  |
| 12  | AMER. RUBRUM     | 0.00  | 0.00  |
| 13  | AMER. RUBRUM     | 0.00  | 0.00  |
| 14  | AMER. RUBRUM     | 0.00  | 0.00  |
| 15  | AMER. RUBRUM     | 0.00  | 0.00  |
| 16  | AMER. RUBRUM     | 0.00  | 0.00  |
| 17  | AMER. RUBRUM     | 0.00  | 0.00  |
| 18  | AMER. RUBRUM     | 0.00  | 0.00  |
| 19  | AMER. RUBRUM     | 0.00  | 0.00  |
| 20  | AMER. RUBRUM     | 0.00  | 0.00  |
| 21  | AMER. RUBRUM     | 0.00  | 0.00  |
| 22  | AMER. RUBRUM     | 0.00  | 0.00  |
| 23  | AMER. RUBRUM     | 0.00  | 0.00  |
| 24  | AMER. RUBRUM     | 0.00  | 0.00  |
| 25  | AMER. RUBRUM     | 0.00  | 0.00  |
| 26  | AMER. RUBRUM     | 0.00  | 0.00  |
| 27  | AMER. RUBRUM     | 0.00  | 0.00  |
| 28  | AMER. RUBRUM     | 0.00  | 0.00  |
| 29  | AMER. RUBRUM     | 0.00  | 0.00  |
| 30  | AMER. RUBRUM     | 0.00  | 0.00  |
| 31  | AMER. RUBRUM     | 0.00  | 0.00  |
| 32  | AMER. RUBRUM     | 0.00  | 0.00  |
| 33  | AMER. RUBRUM     | 0.00  | 0.00  |
| 34  | AMER. RUBRUM     | 0.00  | 0.00  |
| 35  | AMER. RUBRUM     | 0.00  | 0.00  |
| 36  | AMER. RUBRUM     | 0.00  | 0.00  |
| 37  | AMER. RUBRUM     | 0.00  | 0.00  |
| 38  | AMER. RUBRUM     | 0.00  | 0.00  |
| 39  | AMER. RUBRUM     | 0.00  | 0.00  |
| 40  | AMER. RUBRUM     | 0.00  | 0.00  |
| 41  | AMER. RUBRUM     | 0.00  | 0.00  |
| 42  | AMER. RUBRUM     | 0.00  | 0.00  |
| 43  | AMER. RUBRUM     | 0.00  | 0.00  |
| 44  | AMER. RUBRUM     | 0.00  | 0.00  |
| 45  | AMER. RUBRUM     | 0.00  | 0.00  |
| 46  | AMER. RUBRUM     | 0.00  | 0.00  |
| 47  | AMER. RUBRUM     | 0.00  | 0.00  |
| 48  | AMER. RUBRUM     | 0.00  | 0.00  |
| 49  | AMER. RUBRUM     | 0.00  | 0.00  |
| 50  | AMER. RUBRUM     | 0.00  | 0.00  |
| 51  | AMER. RUBRUM     | 0.00  | 0.00  |
| 52  | AMER. RUBRUM     | 0.00  | 0.00  |
| 53  | AMER. RUBRUM     | 0.00  | 0.00  |
| 54  | AMER. RUBRUM     | 0.00  | 0.00  |
| 55  | AMER. RUBRUM     | 0.00  | 0.00  |
| 56  | AMER. RUBRUM     | 0.00  | 0.00  |
| 57  | AMER. RUBRUM     | 0.00  | 0.00  |
| 58  | AMER. RUBRUM     | 0.00  | 0.00  |
| 59  | AMER. RUBRUM     | 0.00  | 0.00  |
| 60  | AMER. RUBRUM     | 0.00  | 0.00  |
| 61  | AMER. RUBRUM     | 0.00  | 0.00  |
| 62  | AMER. RUBRUM     | 0.00  | 0.00  |
| 63  | AMER. RUBRUM     | 0.00  | 0.00  |
| 64  | AMER. RUBRUM     | 0.00  | 0.00  |
| 65  | AMER. RUBRUM     | 0.00  | 0.00  |
| 66  | AMER. RUBRUM     | 0.00  | 0.00  |
| 67  | AMER. RUBRUM     | 0.00  | 0.00  |
| 68  | AMER. RUBRUM     | 0.00  | 0.00  |
| 69  | AMER. RUBRUM     | 0.00  | 0.00  |
| 70  | AMER. RUBRUM     | 0.00  | 0.00  |
| 71  | AMER. RUBRUM     | 0.00  | 0.00  |
| 72  | AMER. RUBRUM     | 0.00  | 0.00  |
| 73  | AMER. RUBRUM     | 0.00  | 0.00  |
| 74  | AMER. RUBRUM     | 0.00  | 0.00  |
| 75  | AMER. RUBRUM     | 0.00  | 0.00  |
| 76  | AMER. RUBRUM     | 0.00  | 0.00  |
| 77  | AMER. RUBRUM     | 0.00  | 0.00  |
| 78  | AMER. RUBRUM     | 0.00  | 0.00  |
| 79  | AMER. RUBRUM     | 0.00  | 0.00  |
| 80  | AMER. RUBRUM     | 0.00  | 0.00  |
| 81  | AMER. RUBRUM     | 0.00  | 0.00  |
| 82  | AMER. RUBRUM     | 0.00  | 0.00  |
| 83  | AMER. RUBRUM     | 0.00  | 0.00  |
| 84  | AMER. RUBRUM     | 0.00  | 0.00  |
| 85  | AMER. RUBRUM     | 0.00  | 0.00  |
| 86  | AMER. RUBRUM     | 0.00  | 0.00  |
| 87  | AMER. RUBRUM     | 0.00  | 0.00  |
| 88  | AMER. RUBRUM     | 0.00  | 0.00  |
| 89  | AMER. RUBRUM     | 0.00  | 0.00  |
| 90  | AMER. RUBRUM     | 0.00  | 0.00  |
| 91  | AMER. RUBRUM     | 0.00  | 0.00  |
| 92  | AMER. RUBRUM     | 0.00  | 0.00  |
| 93  | AMER. RUBRUM     | 0.00  | 0.00  |
| 94  | AMER. RUBRUM     | 0.00  | 0.00  |
| 95  | AMER. RUBRUM     | 0.00  | 0.00  |
| 96  | AMER. RUBRUM     | 0.00  | 0.00  |
| 97  | AMER. RUBRUM     | 0.00  | 0.00  |
| 98  | AMER. RUBRUM     | 0.00  | 0.00  |
| 99  | AMER. RUBRUM     | 0.00  | 0.00  |
| 100 | AMER. RUBRUM     | 0.00  | 0.00  |

| 10. | TYPE                         | 19    | 37   | 82   | 143  | 254  | 258  |
|-----|------------------------------|-------|------|------|------|------|------|
| 1   | PINUS HAPLOXYLON             | 15.53 | 3.00 | 1.00 | 1.00 | 1.00 | 1.00 |
| 2   | PINUS DIPLOXYLON             | 0.00  | 0.00 | 0.00 | 0.00 | 0.00 | 0.00 |
| 3   | TOTAL PINUS                  | 15.53 | 3.00 | 1.00 | 1.00 | 1.00 | 1.00 |
| 4   | ABIES                        | 1.24  | 1.65 | 1.00 | 1.00 | 1.00 | 1.00 |
| 5   | TSUGA                        | 1.24  | 1.65 | 1.00 | 1.00 | 1.00 | 1.00 |
| 6   | FAGUS                        | 1.24  | 1.65 | 1.00 | 1.00 | 1.00 | 1.00 |
| 7   | TILIA                        | 1.24  | 1.65 | 1.00 | 1.00 | 1.00 | 1.00 |
| 8   | ACER SACCHARUM               | 1.24  | 1.65 | 1.00 | 1.00 | 1.00 | 1.00 |
| 9   | QUERCUS                      | 2.48  | 1.17 | 4.00 | 4.00 | 5.00 | 5.00 |
| 10  | CASTANEA                     | 2.48  | 1.17 | 4.00 | 4.00 | 5.00 | 5.00 |
| 11  | CARYA                        | 2.48  | 1.17 | 4.00 | 4.00 | 5.00 | 5.00 |
| 12  | LIQUIDAMBAR                  | 2.48  | 1.17 | 4.00 | 4.00 | 5.00 | 5.00 |
| 13  | BETULA                       | 2.48  | 1.17 | 4.00 | 4.00 | 5.00 | 5.00 |
| 14  | JUGLANS UNDIFF.              | 2.48  | 1.17 | 4.00 | 4.00 | 5.00 | 5.00 |
| 15  | JUGLANS NEREA                | 2.48  | 1.17 | 4.00 | 4.00 | 5.00 | 5.00 |
| 16  | JUGLANS                      | 2.48  | 1.17 | 4.00 | 4.00 | 5.00 | 5.00 |
| 17  | JUGLANS                      | 2.48  | 1.17 | 4.00 | 4.00 | 5.00 | 5.00 |
| 18  | FRAXINUS PENNSYLVANICA-TYPE  | 2.48  | 1.17 | 4.00 | 4.00 | 5.00 | 5.00 |
| 19  | FRAXINUS                     | 2.48  | 1.17 | 4.00 | 4.00 | 5.00 | 5.00 |
| 20  | ULMUS                        | 2.48  | 1.17 | 4.00 | 4.00 | 5.00 | 5.00 |
| 21  | OSTRYA/CALANUS               | 2.48  | 1.17 | 4.00 | 4.00 | 5.00 | 5.00 |
| 22  | ACER RUBRUM                  | 2.48  | 1.17 | 4.00 | 4.00 | 5.00 | 5.00 |
| 23  | PLATANUS                     | 2.48  | 1.17 | 4.00 | 4.00 | 5.00 | 5.00 |
| 24  | CORYLUS                      | 2.48  | 1.17 | 4.00 | 4.00 | 5.00 | 5.00 |
| 25  | AMBROSIA-TYPE                | 2.48  | 1.17 | 4.00 | 4.00 | 5.00 | 5.00 |
| 26  | RUMEX                        | 2.48  | 1.17 | 4.00 | 4.00 | 5.00 | 5.00 |
| 27  | PLANTAGO LANCEOLATA          | 2.48  | 1.17 | 4.00 | 4.00 | 5.00 | 5.00 |
| 28  | PLANTAGO MAJOR               | 2.48  | 1.17 | 4.00 | 4.00 | 5.00 | 5.00 |
| 29  | REGIONAL SUN                 | 2.48  | 1.17 | 4.00 | 4.00 | 5.00 | 5.00 |
| 30  | RHAMNUS/VITIS                | 2.48  | 1.17 | 4.00 | 4.00 | 5.00 | 5.00 |
| 31  | THALICTRUM                   | 2.48  | 1.17 | 4.00 | 4.00 | 5.00 | 5.00 |
| 32  | IMPATIENS                    | 2.48  | 1.17 | 4.00 | 4.00 | 5.00 | 5.00 |
| 33  | URTICA                       | 2.48  | 1.17 | 4.00 | 4.00 | 5.00 | 5.00 |
| 34  | LABIATAE                     | 2.48  | 1.17 | 4.00 | 4.00 | 5.00 | 5.00 |
| 35  | LYCOPODIUM UNDIFF.           | 2.48  | 1.17 | 4.00 | 4.00 | 5.00 | 5.00 |
| 36  | LYCOPODIUM LUCIDULUM         | 2.48  | 1.17 | 4.00 | 4.00 | 5.00 | 5.00 |
| 37  | OSMUNDA UNDIFF.              | 2.48  | 1.17 | 4.00 | 4.00 | 5.00 | 5.00 |
| 38  | SPHAGNUM                     | 2.48  | 1.17 | 4.00 | 4.00 | 5.00 | 5.00 |
| 39  | PTERIDIUM                    | 2.48  | 1.17 | 4.00 | 4.00 | 5.00 | 5.00 |
| 40  | BOTRYCHUM                    | 2.48  | 1.17 | 4.00 | 4.00 | 5.00 | 5.00 |
| 41  | POTAMOGETON                  | 2.48  | 1.17 | 4.00 | 4.00 | 5.00 | 5.00 |
| 42  | NUPHAR                       | 2.48  | 1.17 | 4.00 | 4.00 | 5.00 | 5.00 |
| 43  | NYMPHAEA                     | 2.48  | 1.17 | 4.00 | 4.00 | 5.00 | 5.00 |
| 44  | CEPHALANTHUS                 | 2.48  | 1.17 | 4.00 | 4.00 | 5.00 | 5.00 |
| 45  | NYSSA                        | 2.48  | 1.17 | 4.00 | 4.00 | 5.00 | 5.00 |
| 46  | SALIX                        | 2.48  | 1.17 | 4.00 | 4.00 | 5.00 | 5.00 |
| 47  | ALNUS CF.                    | 2.48  | 1.17 | 4.00 | 4.00 | 5.00 | 5.00 |
| 48  | TELEX                        | 2.48  | 1.17 | 4.00 | 4.00 | 5.00 | 5.00 |
| 49  | SPARGANIUM-TYPE              | 2.48  | 1.17 | 4.00 | 4.00 | 5.00 | 5.00 |
| 50  | LYPHA                        | 2.48  | 1.17 | 4.00 | 4.00 | 5.00 | 5.00 |
| 51  | MONOLETE SPORE               | 2.48  | 1.17 | 4.00 | 4.00 | 5.00 | 5.00 |
| 52  | ARTEMISIA                    | 2.48  | 1.17 | 4.00 | 4.00 | 5.00 | 5.00 |
| 53  | LEGUMIFLORAE                 | 2.48  | 1.17 | 4.00 | 4.00 | 5.00 | 5.00 |
| 54  | TUBULIFLORAE UNDIFF.         | 2.48  | 1.17 | 4.00 | 4.00 | 5.00 | 5.00 |
| 55  | TUBULIFLORAE A               | 2.48  | 1.17 | 4.00 | 4.00 | 5.00 | 5.00 |
| 56  | TUBULIFLORAE B               | 2.48  | 1.17 | 4.00 | 4.00 | 5.00 | 5.00 |
| 57  | TUBULIFLORAE C               | 2.48  | 1.17 | 4.00 | 4.00 | 5.00 | 5.00 |
| 58  | LYCOPODIUM ANNOTINUM         | 2.48  | 1.17 | 4.00 | 4.00 | 5.00 | 5.00 |
| 59  | LYCOPODIUM TRISTACHYUM       | 2.48  | 1.17 | 4.00 | 4.00 | 5.00 | 5.00 |
| 60  | LYCOPODIUM INUNDATUM         | 2.48  | 1.17 | 4.00 | 4.00 | 5.00 | 5.00 |
| 61  | POLYGONUM LAPATHIFOLIUM-TYPE | 2.48  | 1.17 | 4.00 | 4.00 | 5.00 | 5.00 |
| 62  | POLYGONACEAE                 | 2.48  | 1.17 | 4.00 | 4.00 | 5.00 | 5.00 |
| 63  | EPTLOBIUM                    | 2.48  | 1.17 | 4.00 | 4.00 | 5.00 | 5.00 |
| 64  | UMBELLIFERAE                 | 2.48  | 1.17 | 4.00 | 4.00 | 5.00 | 5.00 |
| 65  | CRUCIFERAE                   | 2.48  | 1.17 | 4.00 | 4.00 | 5.00 | 5.00 |
| 66  | CARYOPHYLLACEAE              | 2.48  | 1.17 | 4.00 | 4.00 | 5.00 | 5.00 |
| 67  | ERICACEAE                    | 2.48  | 1.17 | 4.00 | 4.00 | 5.00 | 5.00 |
| 68  | CUPRESSACEAE                 | 2.48  | 1.17 | 4.00 | 4.00 | 5.00 | 5.00 |
| 69  | ROSACEAE UNDIFF.             | 2.48  | 1.17 | 4.00 | 4.00 | 5.00 | 5.00 |
| 70  | RHUS                         | 2.48  | 1.17 | 4.00 | 4.00 | 5.00 | 5.00 |
| 71  | MYRTICA-COMPTONIA            | 2.48  | 1.17 | 4.00 | 4.00 | 5.00 | 5.00 |
| 72  | IVA CF.                      | 2.48  | 1.17 | 4.00 | 4.00 | 5.00 | 5.00 |
| 73  | CYPERACEAE UNDIFF.           | 2.48  | 1.17 | 4.00 | 4.00 | 5.00 | 5.00 |
| 74  | CYPERACEAE A                 | 2.48  | 1.17 | 4.00 | 4.00 | 5.00 | 5.00 |
| 75  | CYPERACEAE B                 | 2.48  | 1.17 | 4.00 | 4.00 | 5.00 | 5.00 |
| 76  | CYPERACEAE C                 | 2.48  | 1.17 | 4.00 | 4.00 | 5.00 | 5.00 |
| 77  | CHENOPODIUM-TYPE             | 2.48  | 1.17 | 4.00 | 4.00 | 5.00 | 5.00 |
| 78  | CHENOPODIUM A                | 2.48  | 1.17 | 4.00 | 4.00 | 5.00 | 5.00 |
| 79  | CHENOPODIUM B                | 2.48  | 1.17 | 4.00 | 4.00 | 5.00 | 5.00 |
| 80  | CHENOPODIUM C                | 2.48  | 1.17 | 4.00 | 4.00 | 5.00 | 5.00 |
| 81  | GRANINAE UNDIFF.             | 2.48  | 1.17 | 4.00 | 4.00 | 5.00 | 5.00 |
| 82  | GURP                         | 2.48  | 1.17 | 4.00 | 4.00 | 5.00 | 5.00 |
| 83  | INDETERMINATE/OBSCURE        | 2.48  | 1.17 | 4.00 | 4.00 | 5.00 | 5.00 |
| 84  | UNKNOWN                      | 2.48  | 1.17 | 4.00 | 4.00 | 5.00 | 5.00 |

## LONG COVE CORE 4

## LONG COVE CORE 4

| NO. | TYPE                        | 0     | 11     | 15    | 19    | 23    | 31    | 34     | 39     | 46    | 60    | 84    | 87    |
|-----|-----------------------------|-------|--------|-------|-------|-------|-------|--------|--------|-------|-------|-------|-------|
| 1   | PINUS HAPLOXYLON            | 1.28  | 42.86  | 14.04 | 7.08  | 10.29 | 0.00  | 2.63   | 5.85   | 9.78  | 14.96 | 5.66  | 3.26  |
| 2   | PINUS DIPLOXYLON            | 12.78 | 0.00   | 5.40  | 0.00  | 0.00  | 13.60 | 17.00  | 19.28  | 13.44 | 16.83 | 16.97 | 22.81 |
| 71  | TOTAL PINUS                 | 14.06 | 42.86  | 19.43 | 7.08  | 10.29 | 13.60 | 19.71  | 17.13  | 23.22 | 31.78 | 22.63 | 26.06 |
| 4   | PICEA                       | .40   | .95    | .71   | 0.00  | 0.00  | 0.00  | .29    | 2.39   | 1.22  | 0.00  | 0.00  | 0.00  |
| 5   | TSUGA                       | 2.41  | 2.86   | 0.00  | .59   | 0.00  | 0.00  | 3.48   | 4.78   | 5.30  | 5.62  | 3.06  | 5.32  |
| 6   | FAGUS                       | .80   | 0.00   | .35   | 0.00  | 0.00  | 0.00  | .87    | .88    | 1.63  | .49   | 1.22  | .53   |
| 7   | ALNUS SACCHARUM             | 3.21  | 2.86   | .71   | 1.18  | 2.74  | 0.00  | 0.00   | 0.00   | 1.53  | 1.10  | 1.22  | .53   |
| 8   | QUERCUS                     | 49.98 | 23.86  | 34.98 | 32.18 | 28.68 | 23.68 | 58.88  | 32.88  | 34.28 | 48.18 | 46.48 | 43.88 |
| 9   | CASTANEA                    | .48   | 0.00   | .71   | .59   | 0.00  | 0.00  | 0.00   | 1.59   | 1.22  | 1.22  | 3.98  | 2.68  |
| 10  | CARYA                       | 2.81  | 1.98   | 1.77  | 2.95  | 0.00  | 0.00  | 1.15   | 1.59   | 3.05  | 2.44  | 4.59  | 1.26  |
| 11  | LIQUIDAMBAR                 | 12.08 | 0.00   | 1.06  | 0.00  | 0.00  | 0.00  | 0.00   | 0.00   | 0.00  | 0.00  | 0.00  | 0.00  |
| 12  | BETULA                      | 12.05 | 11.43  | 12.37 | 12.98 | 13.97 | 12.00 | 11.59  | 7.57   | 18.59 | 9.78  | 18.48 | 11.78 |
| 13  | NORUS                       | .48   | 0.00   | 0.00  | 0.00  | 0.00  | 0.00  | 0.00   | 0.00   | 0.00  | 0.00  | 0.00  | 0.00  |
| 14  | JUGLANS NIGRA               | 0.00  | 0.00   | 0.00  | .59   | .74   | 0.00  | 0.00   | 0.00   | 0.00  | 0.00  | 0.31  | .53   |
| 15  | JUGLANS CINEREA             | 0.00  | 0.00   | .35   | 0.00  | 0.00  | .48   | 0.00   | .68    | .68   | .24   | 0.00  | 0.00  |
| 16  | FRAXINUS PENNSYLVANICA-TYPE | 1.61  | .95    | 1.86  | .29   | 2.21  | .48   | .29    | .68    | 0.00  | .24   | 0.00  | 0.00  |
| 17  | FRAXINUS NIGRA-TYPE         | .88   | 0.00   | 0.00  | .59   | 0.00  | 0.00  | 0.00   | 0.00   | 0.00  | .24   | .92   | 0.00  |
| 18  | UNUS                        | .48   | .95    | 0.00  | 1.47  | 1.47  | .88   | .29    | .88    | .81   | .24   | .92   | 1.86  |
| 19  | OSTRYA/CARPINUS             | .48   | .95    | 0.00  | .59   | 0.00  | .48   | .29    | .88    | .81   | .24   | .92   | 1.86  |
| 20  | ACER RUBRUM                 | 2.01  | .95    | .71   | .29   | .74   | .48   | .29    | .68    | .41   | .24   | .92   | 1.86  |
| 21  | PLATANUS                    | 0.00  | 0.00   | 0.00  | 0.00  | 0.00  | 0.00  | .23    | 0.00   | 0.00  | 0.00  | 0.00  | .53   |
| 22  | CORYLUS                     | 0.00  | 0.00   | .35   | 0.00  | 0.00  | 0.00  | 0.00   | 0.00   | 0.00  | 0.00  | 0.00  | 0.00  |
| 23  | AMORPHOSA-TYPE              | 7.23  | 1.98   | 23.35 | 37.88 | 39.88 | 39.88 | 28.88  | 24.88  | 4.88  | 4.88  | 3.88  | 1.88  |
| 24  | RUBUS                       | 1.28  | 1.98   | 1.86  | .88   | 1.47  | 3.28  | 3.19   | 2.19   | 4.88  | 4.88  | 3.88  | 1.88  |
| 25  | PLANTAGO LANGEOLATA         | 0.00  | 1.98   | .71   | .59   | 0.00  | 0.00  | 1.48   | .48    | 0.00  | 0.00  | 0.00  | 0.00  |
| 26  | PLANTAGO MAJOR              | 0.00  | 0.00   | 0.00  | 0.00  | 0.00  | 1.28  | 0.00   | 0.00   | 0.00  | 0.00  | 0.00  | 0.00  |
| 72  | REGIONAL SUM                | 18.88 | 18.88  | 18.88 | 18.88 | 18.88 | 18.88 | 18.88  | 18.88  | 18.88 | 18.88 | 18.88 | 18.88 |
| 27  | RHAMNUS/VITIS               | 0.00  | 0.00   | 0.00  | .29   | 0.00  | 0.00  | .23    | 0.00   | 0.00  | 0.00  | 0.00  | 0.00  |
| 28  | THALICTRUM                  | 0.00  | 0.00   | 0.00  | 0.00  | 0.00  | 0.00  | 0.00   | 0.00   | 0.00  | 0.00  | 0.00  | 0.00  |
| 29  | IMPATIENS                   | 0.00  | 0.00   | 0.00  | .29   | 0.00  | 0.00  | 0.00   | 0.00   | 0.00  | 0.00  | 0.00  | 0.00  |
| 30  | LABIATAE                    | 7.81  | 0.00   | 1.86  | 0.00  | 0.00  | 0.00  | .29    | 0.00   | 0.00  | 0.00  | 0.00  | 0.00  |
| 31  | LYCOPODIUM UNDIFF.          | 0.00  | 0.00   | .71   | 0.00  | 0.00  | 0.00  | 0.00   | 0.00   | 0.00  | 0.00  | 0.00  | .53   |
| 32  | LYCOPODIUM LUCIDULUM        | 0.00  | 0.00   | 0.00  | 0.00  | 0.00  | 0.00  | 0.00   | 0.00   | 0.00  | 0.00  | .31   | 0.00  |
| 33  | LYCOPODIUM ANNULIUM TYPE    | 0.00  | 0.00   | 0.00  | 0.00  | 0.00  | 0.00  | 0.00   | 0.00   | 0.00  | 0.00  | 0.00  | 0.00  |
| 34  | LYCOPODIUM TRISTACHYUM      | 0.00  | 0.00   | 0.00  | 0.00  | 0.00  | 0.00  | 0.00   | 0.00   | 0.00  | 0.00  | 0.00  | 0.00  |
| 35  | LYCOPODIUM INNOUATUM        | 0.00  | 0.00   | 0.00  | 0.00  | 0.00  | 0.00  | 0.00   | 0.00   | 0.00  | 0.00  | 0.00  | 0.00  |
| 36  | OSMUNDA UNDIFF.             | 1.28  | 0.00   | 0.00  | 0.00  | 0.00  | 1.68  | 0.00   | 0.00   | .28   | .43   | 1.88  | 0.00  |
| 37  | SPHAGNUM                    | 0.00  | 0.00   | .71   | 0.00  | 0.00  | 0.00  | 0.00   | 0.00   | 0.61  | 0.00  | .31   | 0.00  |
| 38  | PIETIDIUM                   | 0.00  | 0.00   | .35   | 0.00  | 0.00  | 0.00  | 0.00   | 0.00   | 0.00  | .24   | 0.00  | 0.00  |
| 39  | DOTRYCHIUM                  | 0.00  | 0.00   | 0.00  | 0.00  | 0.00  | 0.00  | 0.00   | 0.00   | 0.00  | 0.00  | 0.00  | 0.00  |
| 40  | HYSSA                       | .80   | 0.00   | 0.00  | .29   | 0.00  | .48   | 0.00   | 0.00   | .41   | .24   | 0.00  | .53   |
| 41  | SALIX                       | .48   | 0.00   | .35   | .88   | 0.00  | 0.00  | .29    | 0.00   | 0.00  | 0.00  | 0.00  | 0.00  |
| 42  | ALNUS CF.                   | 2.01  | .95    | .35   | .29   | .74   | 1.28  | .29    | 0.00   | 0.00  | 1.28  | 1.31  | 0.00  |
| 43  | ILEX                        | 0.00  | .95    | .35   | .88   | 0.00  | 0.00  | 0.00   | 0.00   | 0.00  | 0.00  | 1.31  | 0.00  |
| 44  | SPARGANIUM-TYPE             | 0.00  | 0.00   | 0.00  | 0.00  | 0.00  | 1.28  | 0.00   | 0.00   | 0.00  | 0.00  | 0.00  | 0.00  |
| 45  | TYPHA                       | 0.00  | 0.00   | .35   | 0.00  | 0.00  | 0.00  | 0.00   | 0.00   | 0.00  | 0.00  | 0.00  | .53   |
| 46  | MONOLETE SPORE              | 1.28  | 1.98   | .35   | 0.00  | 1.47  | 0.00  | .29    | 0.00   | 0.00  | 0.00  | 0.00  | 0.00  |
| 47  | ARTEMISIA                   | 0.00  | 0.00   | .35   | 0.00  | .74   | 0.00  | .29    | 0.00   | 0.00  | 0.00  | 1.31  | 0.00  |
| 48  | LIGULIFLORAE                | 0.00  | 0.00   | 0.00  | 0.00  | 0.00  | 0.00  | 0.00   | 0.00   | 0.00  | 0.00  | 0.00  | 0.00  |
| 49  | TUBULIFLORAE UNDIFF.        | 0.43  | 5.71   | 28.62 | 22.71 | 16.91 | 0.29  | 28.12  | 7.57   | 2.44  | 2.69  | 21.18 | 9.05  |
| 50  | TUBULIFLORAE A              | 0.00  | 0.00   | 0.00  | 0.00  | 0.00  | 0.00  | .29    | 0.00   | 0.00  | 0.00  | 0.00  | 0.00  |
| 51  | EPILOBIUM                   | 0.00  | 0.00   | 0.00  | 0.00  | 0.00  | 0.00  | .29    | 0.00   | 0.00  | 0.00  | 0.00  | 0.00  |
| 52  | UNDELLIFERAE                | 0.00  | 0.00   | 0.00  | 0.00  | 0.00  | 0.00  | 0.00   | 0.00   | 0.00  | 0.00  | 0.00  | 0.00  |
| 53  | CARYOPHYLLACEAE             | 0.00  | 0.00   | 0.00  | 0.00  | 0.00  | 0.00  | 0.00   | 0.00   | 0.00  | 0.00  | 0.00  | 0.00  |
| 54  | ERICACEAE                   | 0.00  | 0.00   | 0.00  | 0.00  | 0.00  | 0.00  | 0.00   | 0.00   | 0.00  | 0.00  | 0.00  | 0.00  |
| 55  | CUPRESSACEAE                | 0.00  | 0.00   | 1.41  | 0.00  | 0.00  | 0.00  | 0.00   | 0.00   | 0.00  | 0.00  | 0.00  | 0.00  |
| 56  | ROSACEAE UNDIFF.            | 2.81  | 0.00   | .35   | 2.86  | 2.21  | 2.48  | 1.93   | 5.18   | 0.00  | 0.00  | 0.00  | 0.00  |
| 57  | RHUS                        | 0.00  | 0.00   | 0.00  | 1.18  | 0.00  | 0.00  | 0.00   | 0.00   | 0.00  | 0.00  | 0.00  | 0.00  |
| 58  | MYRICA-COMPTONIA            | 7.53  | 0.00   | 1.77  | 10.62 | 19.29 | 5.60  | 5.16   | 1.93   | 0.00  | 1.98  | 0.00  | 0.00  |
| 59  | IVA CF.                     | 20.48 | 7.62   | 25.80 | 30.88 | 2.21  | 11.20 | 5.88   | 1.93   | 3.28  | 1.71  | 24.12 | 15.43 |
| 60  | CYPERACEAE UNDIFF.          | 0.00  | 0.00   | 2.12  | .59   | 2.21  | 0.00  | 1.45   | 7.57   | .41   | 1.22  | .31   | 0.00  |
| 61  | CYPERACEAE A                | 1.61  | .95    | .71   | 6.26  | 39.15 | 18.00 | 229.57 | 9.16   | 0.00  | 0.00  | 6.28  | 3.19  |
| 62  | CHEMOPODIACEAE UNDIFF       | 10.84 | .95    | 0.00  | 1.40  | 1.77  | 0.00  | 0.00   | 0.00   | 0.00  | 0.00  | 1.98  | 3.19  |
| 63  | SALICORNIA-TYPE             | 1.61  | 2.86   | 4.24  | .68   | 2.21  | 3.28  | .58    | 1.28   | .41   | .49   | .92   | 1.86  |
| 64  | ATRIPLEX-TYPE               | 0.00  | 2.86   | 0.00  | 2.06  | .74   | 0.00  | 0.00   | 0.00   | 1.63  | .98   | .26   | 1.68  |
| 65  | CHEMOPODIACEAE C            | 0.00  | 0.00   | 0.00  | 0.00  | 0.00  | 0.00  | 0.00   | 0.00   | 0.00  | 0.00  | 0.00  | 0.00  |
| 66  | LINONIUM                    | 0.00  | 0.00   | 0.00  | 0.00  | 0.00  | 0.00  | 0.00   | 0.00   | 0.00  | 0.00  | 0.00  | 0.00  |
| 67  | GRAMINEAE UNDIFF.           | 77.91 | 119.05 | 58.53 | 39.53 | 32.35 | 46.48 | 14.28  | 167.33 | 48.73 | 43.92 | 66.97 | 12.47 |
| 68  | RJPPA                       | .48   | 0.00   | 0.00  | 0.00  | 0.00  | 0.00  | 0.00   | 0.00   | 0.00  | 0.00  | 0.00  | 0.00  |
| 69  | INDEFINITE/OBSCURE          | 20.88 | 38.10  | 42.40 | 35.99 | 13.24 | 9.60  | 11.59  | 14.34  | 18.94 | 12.22 | 21.41 | 13.83 |
| 70  | UNKNOWN                     | .40   | 0.00   | 1.86  | .29   | 0.00  | 0.00  | 0.00   | 0.00   | 2.04  | 2.28  | 1.53  | 0.00  |

## LONG COVE CORE 4 CONTINUED

| LONG COVE CORE 4 (cont.) |                             |                      |        |        |        |        |
|--------------------------|-----------------------------|----------------------|--------|--------|--------|--------|
| NO.                      | TYPE                        | DEPTH OF SAMPLE (CM) |        |        |        |        |
|                          |                             | 91                   | 95     | 102    | 242    | 244    |
| 1                        | PINUS HAPLOXYLON            | 29.44                | 11.86  | 8.30   | 8.03   | 15.50  |
| 2                        | PINUS DIPLOXYLON            | 0.00                 | 18.16  | 14.52  | 5.35   | 18.00  |
| 71                       | TOTAL PINUS                 | 29.44                | 22.02  | 22.82  | 13.39  | 33.50  |
| 4                        | PICEA                       | 1.52                 | 0.82   | 0.00   | 1.47   | 1.33   |
| 5                        | TSUGA                       | 3.55                 | 4.94   | 5.81   | 5.35   | 6.53   |
| 6                        | FASUS                       | 1.02                 | 0.62   | 1.66   | 2.14   | 0.05   |
| 7                        | ACER SACCHARUM              | 4.06                 | 1.23   | 1.24   | 1.61   | 1.09   |
| 8                        | QUERCUS                     | 45.18                | 52.26  | 50.21  | 61.31  | 43.88  |
| 9                        | CASTANEA                    | 1.52                 | 1.06   | 0.00   | 0.54   | 0.24   |
| 10                       | CARYA                       | 4.06                 | 4.32   | 3.32   | 5.09   | 5.57   |
| 11                       | LIQUIDAMBAR                 | 0.00                 | 0.00   | 0.00   | 0.27   | 0.24   |
| 12                       | BETULA                      | 5.50                 | 0.76   | 7.47   | 0.00   | 3.14   |
| 13                       | MORUS                       | 0.00                 | 0.00   | 0.00   | 0.00   | 0.00   |
| 14                       | JUGLANS NIGRA               | 0.00                 | 0.21   | 0.00   | 0.00   | 0.00   |
| 15                       | JUGLANS CINEREA             | 0.00                 | 0.00   | 0.00   | 0.00   | 0.12   |
| 16                       | FRAXINUS PENNSYLVANICA-TYPE | 0.00                 | 0.41   | 1.00   | 0.27   | 0.00   |
| 17                       | FRAXINUS NIGRA-TYPE         | 0.51                 | 0.00   | 0.00   | 0.27   | 0.00   |
| 18                       | ULMUS                       | 0.51                 | 1.02   | 0.00   | 0.54   | 0.36   |
| 19                       | OSTRYA/CARPINUS             | 0.00                 | 0.21   | 0.00   | 0.27   | 0.24   |
| 20                       | ACER RUBRUM                 | 0.51                 | 0.00   | 0.00   | 0.00   | 0.00   |
| 21                       | PLATANUS                    | 0.00                 | 0.00   | 0.00   | 0.00   | 0.00   |
| 22                       | CORYLUS                     | 0.00                 | 0.00   | 0.00   | 0.00   | 0.00   |
| 23                       | AMBROSIA-TYPE               | 2.83                 | 4.12   | 1.66   | 0.54   | 1.33   |
| 24                       | BUNEX                       | 0.51                 | 0.00   | 0.00   | 0.00   | 0.00   |
| 25                       | PLANTAGO LANCEOLATA         | 0.00                 | 0.00   | 0.00   | 0.00   | 0.00   |
| 26                       | PLANTAGO MAJOR              | 0.00                 | 0.00   | 0.00   | 0.00   | 0.00   |
| 72                       | REGIONAL SUN                | 100.00               | 100.00 | 100.00 | 100.00 | 100.00 |
| 27                       | DIAPHRYS/VITIS              | 0.00                 | 0.00   | 0.00   | 0.00   | 0.00   |
| 28                       | THALICTRUM                  | 0.00                 | 0.41   | 0.00   | 0.00   | 0.00   |
| 29                       | IMPATIENS                   | 0.00                 | 0.00   | 0.00   | 0.00   | 0.00   |
| 30                       | LARIATAE                    | 0.00                 | 0.02   | 0.00   | 0.00   | 0.12   |
| 31                       | LYCOPODIUM UNDIFF.          | 0.00                 | 0.21   | 0.00   | 0.54   | 0.00   |
| 32                       | LYCOPODIUM LUCIDULUM        | 0.51                 | 0.00   | 0.00   | 0.00   | 0.00   |
| 33                       | LYCOPODIUM ANNOTIUM-TYPE    | 0.51                 | 0.00   | 0.00   | 0.00   | 0.00   |
| 34                       | LYCOPODIUM TRISTACHYUM      | 0.00                 | 0.00   | 0.00   | 0.00   | 0.00   |
| 35                       | LYCOPODIUM INUNDATUM        | 0.00                 | 0.00   | 0.00   | 0.00   | 0.00   |
| 36                       | OSHRUNDA UNDIFF.            | 0.00                 | 1.02   | 0.41   | 0.00   | 0.24   |
| 37                       | SPHAGNUM                    | 0.00                 | 0.21   | 0.41   | 0.27   | 0.40   |
| 38                       | PTERIDIUM                   | 1.02                 | 3.09   | 0.63   | 0.54   | 0.00   |
| 39                       | BOTRYCHIUM                  | 0.00                 | 0.00   | 0.00   | 0.00   | 0.00   |
| 40                       | NYSSA                       | 0.00                 | 0.00   | 0.00   | 0.27   | 0.24   |
| 41                       | SALIX                       | 0.00                 | 0.00   | 0.00   | 0.00   | 0.00   |
| 42                       | ALNUS CF.                   | 0.00                 | 1.44   | 2.49   | 0.00   | 0.40   |
| 43                       | T. FX                       | 0.00                 | 0.00   | 0.00   | 0.00   | 0.12   |
| 44                       | SPARGANIUM-TYPE             | 0.00                 | 0.00   | 0.00   | 0.00   | 0.12   |
| 45                       | TYPHA                       | 0.00                 | 0.21   | 0.00   | 0.00   | 0.00   |
| 46                       | MONOLETE SPORE              | 1.52                 | 0.41   | 0.00   | 0.00   | 0.97   |
| 47                       | ARTENISTA                   | 0.00                 | 0.21   | 0.41   | 0.27   | 0.40   |
| 48                       | LIGULIFLORAE                | 0.00                 | 0.21   | 0.00   | 0.00   | 0.00   |
| 49                       | TUBULIFLORAE UNDIFF.        | 1.52                 | 1.23   | 2.07   | 0.00   | 0.00   |
| 50                       | TUBULIFLORAE A              | 1.52                 | 0.21   | 0.00   | 0.00   | 0.00   |
| 51                       | EPILABIUM                   | 0.00                 | 0.00   | 0.00   | 0.00   | 0.00   |
| 52                       | UMBELLIFERAE                | 0.00                 | 0.00   | 0.00   | 0.00   | 0.00   |
| 53                       | CARYOPHYLLACEAE             | 0.00                 | 0.00   | 0.00   | 0.00   | 0.00   |
| 54                       | ERICACEAE                   | 0.00                 | 0.00   | 0.00   | 0.00   | 0.12   |
| 55                       | CUPRESSACEAE                | 0.00                 | 0.00   | 0.00   | 0.00   | 0.00   |
| 56                       | ROSACEAE UNDIFF.            | 0.00                 | 0.21   | 0.00   | 0.00   | 0.00   |
| 57                       | RHUS                        | 0.00                 | 0.00   | 0.00   | 0.00   | 0.00   |
| 58                       | MYRICA-COMPTONIA            | 0.51                 | 2.06   | 2.49   | 1.34   | 1.40   |
| 59                       | IVA CF.                     | 4.06                 | 2.06   | 1.00   | 1.34   | 1.27   |
| 60                       | CYPERACEAE UNDIFF.          | 0.00                 | 0.00   | 1.66   | 0.54   | 0.00   |
| 61                       | CYPERACEAE A                | 1.02                 | 0.62   | 0.00   | 0.54   | 0.36   |
| 62                       | CHEENOPODIACEAE UNDIFF      | 1.02                 | 0.02   | 0.00   | 0.00   | 0.00   |
| 63                       | SALICORNIA-TYPE             | 7.11                 | 6.17   | 2.00   | 0.00   | 0.00   |
| 64                       | ATRIPLEX-TYPE               | 0.00                 | 1.23   | 0.00   | 0.54   | 0.00   |
| 65                       | CHEENOPODIACEAE C           | 0.51                 | 0.21   | 1.66   | 0.00   | 0.00   |
| 66                       | LIMONIUM                    | 0.00                 | 2.06   | 0.00   | 0.00   | 0.00   |
| 67                       | GRIMINAE UNDIFF.            | 61.93                | 17.66  | 24.00  | 1.07   | 1.21   |
| 68                       | RUPPIA                      | 0.00                 | 0.00   | 0.00   | 0.00   | 0.00   |
| 69                       | INDETERMINATE/OBSCURE       | 62.44                | 8.02   | 13.69  | 36.41  | 7.99   |
| 70                       | UNKNOWN                     | 0.00                 | 0.00   | 0.41   | 0.54   | 0.24   |

| NO. | TYPE                        | 17     |
|-----|-----------------------------|--------|
| 1   | PINUS HAPLOXYLON            | 1.00   |
| 2   | PINUS DIPLOXYLON            | 0.00   |
| 3   | TOTAL PINUS                 | 1.00   |
| 4   | PTERIDIUM                   | 0.00   |
| 5   | ARTEMISSIA                  | 0.00   |
| 6   | TSUGA                       | 0.00   |
| 7   | FAGUS                       | 0.00   |
| 8   | TILIA                       | 0.00   |
| 9   | ACER SACCHARUM              | 0.00   |
| 10  | QUERCUS                     | 0.00   |
| 11  | CASTANEA                    | 0.00   |
| 12  | CARYA                       | 0.00   |
| 13  | LIQUIDAMBAR                 | 0.00   |
| 14  | BETULA                      | 0.00   |
| 15  | JUGLANS UNDIFF.             | 0.00   |
| 16  | JUGLANS CINEREA             | 0.00   |
| 17  | JUGLANS NIGRA               | 0.00   |
| 18  | FRAXINUS PENNSYLVANICA-TYPE | 0.00   |
| 19  | FRAXINUS NIGRA-TYPE         | 0.00   |
| 20  | ULMUS                       | 0.00   |
| 21  | OSTYA/CARPINUS              | 0.00   |
| 22  | ACER RUBRUM                 | 0.00   |
| 23  | PLATANUS                    | 0.00   |
| 24  | CORYLUS                     | 0.00   |
| 25  | AMBROSIA-TYPE               | 0.00   |
| 26  | RUMEX                       | 0.00   |
| 27  | PLANTAGO LANCEOLATA         | 0.00   |
| 28  | PLANTAGO MAJOR              | 0.00   |
| 29  | REGIONAL SUM                | 100.00 |
| 30  | RHAMNUS/VITIS               | 0.00   |
| 31  | THALICTRUM                  | 0.00   |
| 32  | IMPATIENS                   | 0.00   |
| 33  | URTICA                      | 0.00   |
| 34  | LARIATAE                    | 0.00   |
| 35  | LYCOPodium UNDIFF.          | 0.00   |
| 36  | LYCOPodium LUCIDULUM        | 0.00   |
| 37  | OSMUNDA UNDIFF.             | 0.00   |
| 38  | SPHAGNUM                    | 0.00   |
| 39  | PTERIDIUM                   | 0.00   |
| 40  | ROTRYCIUM                   | 0.00   |
| 41  | POTAMOGETON                 | 0.00   |
| 42  | NUPHAR                      | 0.00   |
| 43  | NYMPHAEA                    | 0.00   |
| 44  | CEPHALANTHUS                | 0.00   |
| 45  | NYSSA                       | 0.00   |
| 46  | SALIX                       | 0.00   |
| 47  | ALNUS CF.                   | 0.00   |
| 48  | ILEX                        | 0.00   |
| 49  | SPARGANIUM-TYPE             | 0.00   |
| 50  | TYPHA                       | 0.00   |
| 51  | MONOLETE SPORE              | 0.00   |
| 52  | ARTERISTIA                  | 0.00   |
| 53  | LYCULT FLORAE               | 0.00   |
| 54  | TUBUL FLORAE UNDIFF.        | 20.00  |
| 55  | TUBUL FLORAE A              | 0.00   |
| 56  | TUBUL FLORAE B              | 0.00   |
| 57  | TUBUL FLORAE C              | 0.00   |
| 58  | LYCOPodium ANNOTINUM        | 0.00   |
| 59  | LYCOPodium TRISTACHYUM      | 0.00   |
| 60  | LYCOPodium INUNDATUM        | 0.00   |
| 61  | POLYCOM LAMNACEAE           | 0.00   |
| 62  | POLYCOMACEAE                | 0.00   |
| 63  | EPILOBIUM                   | 0.00   |
| 64  | UMBELLIFEREAE               | 0.00   |
| 65  | CRUCIFERAE                  | 0.00   |
| 66  | CARYOPHYLLACEAE             | 0.00   |
| 67  | ERICACEAE                   | 0.00   |
| 68  | CUPRESSACEAE                | 0.00   |
| 69  | ROSACEAE UNDIFF.            | 0.00   |
| 70  | RHUS                        | 0.00   |
| 71  | MYRICA-COMPTONIA            | 0.00   |
| 72  | LYSACEAE UNDIFF.            | 0.00   |
| 73  | CYPERACEAE                  | 0.00   |
| 74  | CHENOPODIUM-TYPE            | 1.00   |
| 75  | CHENOPODIUM A               | 0.00   |
| 76  | CHENOPODIUM B               | 0.00   |
| 77  | CHENOPODIUM C               | 0.00   |
| 78  | GRAMINAE UNDIFF.            | 0.00   |
| 79  | RUPPIA                      | 0.00   |
| 80  | INDETERMINATE/OSCURE        | 11.00  |
| 81  | UNKNOWN                     | 0.00   |
